# Supplementary material for: Rapid Identification of Potential Drugs for Diabetic Nephropathy Using Whole-Genome Expression Profiles of Glomeruli
Source: Biomed Res Int. 2016 Mar 16;2016:1634730. doi: 10.1155/2016/1634730 (PMC4812204; doi:10.1155/2016/1634730)
Supplement: Supplementary file 1 — S1. DEGs between early stage DN samples and the normal controls. S2. DEGs between late stage DN samples and the normal controls. S3. DEGs between early and late stage DN samples. [file 1634730.f1.xlsx]

## Sheet: early_1fc.0.585_symbol
Entrez Gene ID	Gene Symbol	logFC	AveExpr	t	P.Value	adj.P.Val
2353	FOS	-4.61206	7.73099	-15.0007	1.75353e-13	3.53441e-09
100128537	C1orf132	2.57087	8.22534	11.5737	3.736e-11	3.76514e-07
4248	MGAT3	1.4373	7.88563	11.2177	6.96325e-11	4.67838e-07
1958	EGR1	-1.41665	11.6935	-10.5593	2.28636e-10	1.1521e-06
7538	ZFP36	-1.92997	9.09858	-10.3035	3.67792e-10	1.48264e-06
3725	JUN	-1.19903	10.4996	-10.1969	4.49363e-10	1.50956e-06
467	ATF3	-2.27042	8.2564	-9.96674	6.95975e-10	2.00401e-06
100302650	BRE-AS1	-3.33421	5.44455	-9.48552	1.77381e-09	4.46912e-06
22846	VASH1	1.46734	8.93604	8.98128	4.8787e-09	1.09261e-05
3726	JUNB	-1.32084	10.3209	-8.63262	1.00115e-08	2.01793e-05
4261	CIITA	1.87733	8.34927	8.53651	1.224e-08	2.24281e-05
2335	FN1	1.90681	11.2557	8.06338	3.35113e-08	5.62878e-05
1843	DUSP1	-1.87902	10.8518	-7.9912	3.91794e-08	5.82589e-05
2354	FOSB	-3.06646	6.75881	-7.97633	4.04656e-08	5.82589e-05
8337	HIST2H2AA3	-1.64905	8.99424	-7.91023	4.6726e-08	6.27873e-05
9647	PPM1F	1.04238	9.99324	7.76361	6.44222e-08	8.11559e-05
1441	CSF3R	-1.75423	6.15506	-7.43668	1.33209e-07	0.000157938
55350	VNN3	-2.05261	3.71179	-7.28977	1.85478e-07	0.000207694
146225	CMTM2	-2.49287	6.00424	-7.21732	2.186e-07	0.0002319
5996	RGS1	-2.58016	6.17097	-7.09119	2.91454e-07	0.000293728
5008	OSM	-2.307	5.04467	-7.05548	3.16304e-07	0.000303591
2357	FPR1	-1.72594	7.77885	-6.87315	4.81532e-07	0.000441171
3577	CXCR1	-1.79491	5.35765	-6.68944	7.38547e-07	0.000647224
3579	CXCR2	-2.60836	6.53152	-6.66613	7.79959e-07	0.000655035
366	AQP9	-2.40752	5.88071	-6.57558	9.64732e-07	0.000777806
26253	CLEC4E	-2.07876	7.60837	-6.45218	1.29098e-06	0.00100081
54863	TOR4A	0.966299	10.0072	6.43491	1.34492e-06	0.00100401
7832	BTG2	-0.790229	10.584	-6.36683	1.58085e-06	0.00113799
219699	UNC5B	1.38791	9.30788	6.18751	2.42597e-06	0.00168613
5743	PTGS2	-2.46199	7.52666	-6.09293	3.0452e-06	0.00204597
1277	COL1A1	2.28101	11.07	6.05023	3.37542e-06	0.00219467
1326	MAP3K8	0.998832	7.074	5.9067	4.77787e-06	0.00299649
84658	EMR3	-1.21912	4.21191	-5.89581	4.90595e-06	0.00299649
54210	TREM1	-2.44435	5.52081	-5.81244	6.00936e-06	0.00356249
5166	PDK4	-1.19668	10.54	-5.7211	7.51096e-06	0.00432546
4839	NOP2	0.655545	7.93859	5.6445	9.06143e-06	0.0050734
1293	COL6A3	1.34402	9.22463	5.61422	9.76052e-06	0.00531711
56159	TEX11	-2.72807	5.41161	-5.57158	1.0839e-05	0.00574925
64332	NFKBIZ	0.821564	9.49487	5.53625	1.18235e-05	0.00597404
6402	SELL	-1.56948	8.07229	-5.51459	1.24716e-05	0.00597404
586	BCAT1	1.36629	7.74642	5.5111	1.25793e-05	0.00597404
2350	FOLR2	1.58865	9.44579	5.50907	1.26425e-05	0.00597404
4858	NOVA2	0.843841	7.10937	5.5058	1.27448e-05	0.00597404
1278	COL1A2	1.28921	10.6383	5.45066	1.4602e-05	0.00668906
286336	FAM78A	1.00504	7.35468	5.41177	1.60749e-05	0.00704359
64231	MS4A6A	1.20066	10.1692	5.37622	1.7553e-05	0.00752764
94031	HTRA3	-0.848316	6.44895	-5.34534	1.89479e-05	0.00785029
6280	S100A9	-1.86485	7.69332	-5.34244	1.90844e-05	0.00785029
8793	TNFRSF10D	0.835228	8.28125	5.30929	2.07191e-05	0.00835229
7706	TRIM25	0.875123	8.87721	5.28943	2.17651e-05	0.0086019
6452	SH3BP2	1.16627	9.30521	5.2766	2.24698e-05	0.00866998
5266	PI3	-1.96224	5.91291	-5.27076	2.27976e-05	0.00866998
5997	RGS2	-0.950846	10.8185	-5.21688	2.60634e-05	0.00972841
2358	FPR2	-1.39471	4.01118	-5.18233	2.84027e-05	0.0103822
2857	GPR34	1.85831	6.39425	5.17612	2.88451e-05	0.0103822
713	C1QB	1.58423	7.91148	5.15132	3.06815e-05	0.0108494
7045	TGFBI	1.30867	10.6004	5.11596	3.35078e-05	0.0116446
56124	PCDHB12	-0.664514	5.2543	-5.093	3.54816e-05	0.0121215
79075	DSCC1	0.6956	7.95974	5.07434	3.71722e-05	0.0124874
4060	LUM	1.23955	11.0534	4.98801	4.61151e-05	0.0149919
1896	EDA	-0.96418	5.88936	-4.97911	4.71524e-05	0.0150858
6614	SIGLEC1	1.67757	6.85233	4.85812	6.38257e-05	0.0197316
9241	NOG	1.53851	6.25539	4.85324	6.46103e-05	0.0197316
3164	NR4A1	-1.18261	7.20214	-4.83893	6.69682e-05	0.0201464
6279	S100A8	-1.81638	10.0485	-4.80609	7.27131e-05	0.021553
4684	NCAM1	1.39786	8.08101	4.786	7.64684e-05	0.0220185
100507073	LOC100507073	1.86303	5.78151	4.77605	7.84005e-05	0.0222569
2681	GGTA1P	1.26758	8.11546	4.74884	8.39383e-05	0.0234981
114899	C1QTNF3	1.07206	9.47603	4.67902	0.000100009	0.0276135
9289	GPR56	0.766272	11.1932	4.60824	0.00011946	0.0321043
100653022	PP12719	1.68534	6.40601	4.59622	0.000123121	0.032653
1735	DIO3	-0.945909	5.30934	-4.57951	0.000128399	0.0336106
728	C5AR1	-1.2325	8.80074	-4.54533	0.000139909	0.0361539
683	BST1	-0.776214	9.34074	-4.53539	0.000143448	0.0363582
144423	GLT1D1	-1.23838	4.98352	-4.53301	0.000144307	0.0363582
4312	MMP1	1.85737	5.79531	4.51372	0.000151471	0.0376589
631	BFSP1	0.763863	7.37147	4.50481	0.0001549	0.0376589
1589	CYP21A2	1.24969	9.45286	4.50436	0.000155075	0.0376589
5329	PLAUR	-0.84172	7.53618	-4.49012	0.000160725	0.0385663
340578	DCAF12L2	-2.00976	5.90105	-4.47884	0.000165342	0.0388284
400931	MIRLET7BHG	0.814058	5.32027	4.47805	0.00016567	0.0388284
64321	SOX17	0.928731	9.37512	4.46675	0.00017044	0.0393487
100506603	LOC100506603	0.698702	8.10751	4.4636	0.000171795	0.0393487
5176	SERPINF1	1.90435	8.6564	4.4416	0.00018156	0.0401353
222487	GPR97	-0.836525	4.25171	-4.44096	0.00018185	0.0401353
8875	VNN2	-1.16694	7.48831	-4.43373	0.000185185	0.0401353
9783	RIMS3	0.855222	8.51809	4.4214	0.000191009	0.0405261
2146	EZH2	0.935002	7.39322	4.40842	0.000197339	0.0414329
4125	MAN2B1	0.66585	9.18592	4.38956	0.000206916	0.0429959
5004	ORM1	-0.901057	3.77781	-4.36491	0.000220129	0.0448356
714	C1QC	1.62294	9.37096	4.33723	0.000235974	0.0471637
1306	COL15A1	1.08128	9.23891	4.33663	0.000236333	0.0471637
3553	IL1B	-1.405	6.62305	-4.32	0.000246413	0.0482204
712	C1QA	1.41967	8.25279	4.31595	0.000248927	0.048244
8832	CD84	1.19278	6.61084	4.30933	0.000253099	0.048302
93082	NEURL3	1.22548	6.40528	4.30754	0.000254239	0.048302
2814	GP5	-0.883697	4.6264	-4.30415	0.000256416	0.048302
100642175	SPRY4-IT1	1.69815	9.02984	4.2806	0.000272029	0.0489972
3034	HAL	-0.963491	3.89845	-4.27752	0.000274144	0.0489972
653390	RRN3P2	-1.21578	5.32345	-4.27429	0.00027637	0.0489972
100500850	MIR3682	0.908002	5.07472	4.27321	0.000277122	0.0489972
100130449	PP14571	-1.14011	4.67644	-4.26147	0.000285407	0.049051
54510	PCDH18	0.635471	10.0022	4.2614	0.000285461	0.049051
154089	LINC01312	-1.35532	3.12828	-4.25903	0.000287161	0.049051
9997	SCO2	0.85117	8.52525	4.25374	0.000291002	0.0492894
