# Supplementary material for: Rapid Identification of Potential Drugs for Diabetic Nephropathy Using Whole-Genome Expression Profiles of Glomeruli
Source: Biomed Res Int. 2016 Mar 16;2016:1634730. doi: 10.1155/2016/1634730 (PMC4812204; doi:10.1155/2016/1634730)
Supplement: Supplementary file 2 [file 1634730.f2.xlsx]

## Sheet: late_1fc.0.585_symbol
Entrez Gene ID	Gene Symbo	logFC	AveExpr	t	P.Value	adj.P.Val
2353	FOS	-4.06042	7.73099	-15.2495	1.23563e-13	2.49054e-09
586	BCAT1	3.00238	7.74642	13.9839	7.7119e-13	5.57226e-09
2335	FN1	2.84719	11.2557	13.9026	8.71388e-13	5.57226e-09
1293	COL6A3	2.84562	9.22463	13.7255	1.13927e-12	5.57226e-09
64231	MS4A6A	2.63013	10.1692	13.5989	1.38228e-12	5.57226e-09
1278	COL1A2	2.72035	10.6383	13.2807	2.26103e-12	7.59557e-09
4248	MGAT3	1.42757	7.88563	12.8655	4.35723e-12	1.25463e-08
8832	CD84	3.05213	6.61084	12.7328	5.39193e-12	1.3585e-08
713	C1QB	3.35435	7.91148	12.5944	6.74601e-12	1.51081e-08
2857	GPR34	3.83206	6.39425	12.325	1.04898e-11	2.11432e-08
2350	FOLR2	2.99162	9.44579	11.9791	1.86882e-11	3.26096e-08
22846	VASH1	1.69172	8.93604	11.9565	1.94143e-11	3.26096e-08
3489	IGFBP6	2.52026	9.05977	11.7836	2.60434e-11	4.03793e-08
100128537	C1orf132	2.2428	8.22534	11.6587	3.22626e-11	4.64489e-08
7058	THBS2	3.15218	10.1413	11.466	4.50342e-11	6.0514e-08
1277	COL1A1	3.71645	11.07	11.3826	5.20926e-11	6.56236e-08
7538	ZFP36	-1.83828	9.09858	-11.3322	5.69063e-11	6.74708e-08
3725	JUN	-1.14353	10.4996	-11.2294	6.82047e-11	7.63741e-08
7045	TGFBI	2.44594	10.6004	11.0411	9.53307e-11	1.01131e-07
6614	SIGLEC1	3.2838	6.85233	10.9808	1.06209e-10	1.07037e-07
87	ACTN1	1.48012	10.3988	10.8468	1.35213e-10	1.29779e-07
712	C1QA	3.06125	8.25279	10.7462	1.62314e-10	1.48666e-07
960	CD44	1.7266	9.91731	10.722	1.69643e-10	1.48666e-07
115908	CTHRC1	3.85301	7.93525	10.5857	2.17788e-10	1.82905e-07
714	C1QC	3.40267	9.37096	10.5002	2.54987e-10	1.87618e-07
11326	VSIG4	3.34801	7.91136	10.4979	2.56082e-10	1.87618e-07
2200	FBN1	1.55758	9.44513	10.4965	2.56746e-10	1.87618e-07
1290	COL5A2	2.12342	8.71087	10.4884	2.60633e-10	1.87618e-07
4837	NNMT	3.4021	10.4394	10.3904	3.12673e-10	2.10121e-07
51284	TLR7	2.74005	7.18155	10.3903	3.12742e-10	2.10121e-07
5118	PCOLCE	2.52479	8.47975	10.3476	3.38641e-10	2.20182e-07
1359	CPA3	5.02532	5.98227	10.2833	3.82019e-10	2.40625e-07
54209	TREM2	2.90828	6.13102	10.2553	4.02615e-10	2.45913e-07
2681	GGTA1P	2.36306	8.11546	10.2225	4.28225e-10	2.49796e-07
4125	MAN2B1	1.34102	9.18592	10.2082	4.39919e-10	2.49796e-07
51338	MS4A4A	3.48694	6.958	10.2007	4.46152e-10	2.49796e-07
4481	MSR1	2.6077	5.37148	10.1547	4.8671e-10	2.65139e-07
55016	MARCH1	2.65564	7.63001	10.1317	5.0837e-10	2.6965e-07
3394	IRF8	2.27208	8.73916	10.0984	5.41489e-10	2.79853e-07
2274	FHL2	1.68137	10.1243	10.0039	6.48205e-10	3.26631e-07
10962	MLLT11	1.66487	9.54594	9.98668	6.69927e-10	3.29343e-07
9497	SLC4A7	1.36246	8.53471	9.96598	6.96993e-10	3.33664e-07
165	AEBP1	1.75392	11.4044	9.95498	7.11825e-10	3.33664e-07
9450	LY86	2.5511	7.64008	9.92939	7.47622e-10	3.42479e-07
2191	FAP	4.26602	5.56243	9.90475	7.83862e-10	3.45298e-07
6876	TAGLN	1.67169	11.2956	9.90198	7.88038e-10	3.45298e-07
4082	MARCKS	1.43142	11.1216	9.85355	8.65057e-10	3.70981e-07
2115	ETV1	1.42904	7.69442	9.83088	9.03743e-10	3.79497e-07
401097	C3orf80	3.00575	5.32519	9.81525	9.3145e-10	3.83149e-07
9509	ADAMTS2	2.14601	6.65208	9.79926	9.60698e-10	3.87277e-07
64332	NFKBIZ	1.2563	9.49487	9.77547	1.006e-09	3.97585e-07
1306	COL15A1	2.10514	9.23891	9.74904	1.05891e-09	4.10449e-07
285590	SH3PXD2B	2.13214	6.92075	9.72332	1.11317e-09	4.23342e-07
1843	DUSP1	-1.97525	10.8518	-9.69998	1.1649e-09	4.3481e-07
79690	GAL3ST4	1.81983	7.71333	9.60993	1.38888e-09	5.08985e-07
2690	GHR	-1.12201	10.242	-9.5574	1.53965e-09	5.54166e-07
5176	SERPINF1	3.54478	8.6564	9.54666	1.57249e-09	5.56055e-07
1289	COL5A1	2.75893	8.1927	9.52056	1.65537e-09	5.70593e-07
9332	CD163	2.92928	8.99042	9.51603	1.67022e-09	5.70593e-07
1589	CYP21A2	2.26482	9.45286	9.42611	1.99502e-09	6.70195e-07
718	C3	4.00414	10.2357	9.40354	2.08634e-09	6.89382e-07
54504	CPVL	1.5789	9.97285	9.38608	2.15997e-09	7.022e-07
11098	PRSS23	1.64936	10.4747	9.35194	2.31171e-09	7.36285e-07
4240	MFGE8	1.33965	9.36833	9.34629	2.33788e-09	7.36285e-07
30835	CD209	3.53175	7.25706	9.27873	2.67546e-09	8.2964e-07
4313	MMP2	1.81018	9.26091	9.26855	2.73048e-09	8.33872e-07
11259	FILIP1L	1.86988	9.44903	9.22684	2.96863e-09	8.9307e-07
100302650	BRE-AS1	-2.80442	5.44455	-9.21257	3.05493e-09	9.05518e-07
54510	PCDH18	1.18726	10.0022	9.19332	3.17546e-09	9.27601e-07
26508	HEYL	1.85566	8.07732	9.16647	3.35183e-09	9.65136e-07
4261	CIITA	1.74114	8.34927	9.14203	3.52116e-09	9.99611e-07
10406	WFDC2	2.74883	10.4986	9.11845	3.69288e-09	1.02348e-06
83733	SLC25A18	-1.42545	7.68007	-9.11652	3.70735e-09	1.02348e-06
5376	PMP22	1.10831	10.533	9.10987	3.75756e-09	1.02348e-06
953	ENTPD1	0.974416	9.2885	9.06617	4.10523e-09	1.09603e-06
57125	PLXDC1	2.66493	7.11745	9.05303	4.21616e-09	1.09603e-06
100507073	LOC100507073	3.05809	5.78151	9.05252	4.22047e-09	1.09603e-06
5918	RARRES1	4.71434	6.97018	9.04645	4.27281e-09	1.09603e-06
90865	IL33	2.73171	6.96109	9.04381	4.29579e-09	1.09603e-06
54843	SYTL2	2.14672	8.95413	9.03188	4.40121e-09	1.09791e-06
4060	LUM	1.94351	11.0534	9.03066	4.41213e-09	1.09791e-06
6274	S100A3	2.22044	5.92652	8.99164	4.77674e-09	1.16741e-06
286827	TRIM59	2.30404	6.57449	8.98852	4.80725e-09	1.16741e-06
3671	ISLR	3.93094	7.238	8.98125	4.87904e-09	1.17074e-06
8728	ADAM19	1.87407	8.08178	8.96222	5.07214e-09	1.20275e-06
55332	DRAM1	0.921412	10.5556	8.94163	5.29003e-09	1.23984e-06
2359	FPR3	3.01554	5.85305	8.91765	5.55602e-09	1.28657e-06
945	CD33	2.39348	6.48868	8.91231	5.61711e-09	1.28657e-06
943	TNFRSF8	-1.40096	6.83394	-8.90095	5.74942e-09	1.29327e-06
6356	CCL11	3.96464	6.00577	8.89881	5.77465e-09	1.29327e-06
140885	SIRPA	-0.939986	10.886	-8.88632	5.92448e-09	1.31224e-06
1896	EDA	-1.48609	5.88936	-8.86154	6.23363e-09	1.34868e-06
9645	MICAL2	0.913215	11.0274	8.85883	6.26846e-09	1.34868e-06
23643	LY96	1.12154	10.7068	8.85504	6.31743e-09	1.34868e-06
50863	NTM	2.76251	8.25223	8.85203	6.35667e-09	1.34868e-06
114757	CYGB	2.03603	7.24347	8.7633	7.6327e-09	1.59315e-06
4320	MMP11	1.83139	6.27274	8.76113	7.66696e-09	1.59315e-06
6710	SPTB	-1.96362	8.46011	-8.71256	8.47821e-09	1.74374e-06
7450	VWF	2.25458	7.70523	8.70717	8.57358e-09	1.74555e-06
84624	FNDC1	3.54698	7.37005	8.69006	8.88356e-09	1.76401e-06
113146	AHNAK2	3.81457	6.41542	8.68818	8.91837e-09	1.76401e-06
6423	SFRP2	5.21526	8.15279	8.68773	8.9268e-09	1.76401e-06
283431	GAS2L3	2.18027	7.19985	8.67351	9.19443e-09	1.79925e-06
54863	TOR4A	1.12681	10.0072	8.66464	9.36566e-09	1.81514e-06
1436	CSF1R	2.05059	8.40437	8.62838	1.01004e-08	1.92065e-06
2621	GAS6	-0.708373	9.74969	-8.62837	1.01007e-08	1.92065e-06
4312	MMP1	3.06287	5.79531	8.59477	1.08344e-08	2.04091e-06
29108	PYCARD	1.51237	8.79223	8.57117	1.13826e-08	2.12434e-06
3082	HGF	3.23087	7.23044	8.56533	1.15225e-08	2.13072e-06
145864	HAPLN3	2.08842	7.06553	8.54082	1.21298e-08	2.22262e-06
9855	FARP2	-0.792884	6.79106	-8.47222	1.40105e-08	2.54411e-06
83439	TCF7L1	-0.919504	10.4004	-8.44598	1.48074e-08	2.62759e-06
51339	DACT1	2.43088	7.86633	8.44399	1.48695e-08	2.62759e-06
54751	FBLIM1	1.4286	8.74803	8.44153	1.49469e-08	2.62759e-06
2210	FCGR1B	2.54071	7.06296	8.44011	1.49917e-08	2.62759e-06
51330	TNFRSF12A	2.03058	8.59421	8.43561	1.51349e-08	2.62982e-06
3726	JUNB	-1.11481	10.3209	-8.4132	1.58683e-08	2.73091e-06
1687	DFNA5	0.849399	8.54792	8.40966	1.59877e-08	2.73091e-06
1191	CLU	1.2443	12.1433	8.40466	1.61575e-08	2.7333e-06
10826	FAXDC2	-0.764152	10.1956	-8.4013	1.62729e-08	2.7333e-06
283316	CD163L1	2.09707	5.55943	8.37733	1.71197e-08	2.8113e-06
6507	SLC1A3	3.23371	7.11589	8.37366	1.72536e-08	2.8113e-06
4017	LOXL2	1.60018	7.73575	8.37298	1.72784e-08	2.8113e-06
3764	KCNJ8	2.48159	7.70464	8.37252	1.72951e-08	2.8113e-06
1009	CDH11	1.62561	9.96202	8.36193	1.76877e-08	2.82965e-06
6366	CCL21	3.98835	9.10844	8.35392	1.7991e-08	2.82965e-06
6039	RNASE6	2.19196	8.63628	8.35342	1.80101e-08	2.82965e-06
51200	CPA4	3.35167	5.9815	8.35185	1.80701e-08	2.82965e-06
7837	PXDN	1.1177	10.5494	8.35081	1.811e-08	2.82965e-06
170371	C10orf128	2.71819	7.66631	8.34225	1.8442e-08	2.83712e-06
56925	LXN	0.911043	10.4334	8.33619	1.8681e-08	2.83712e-06
719	C3AR1	2.07537	8.07326	8.33569	1.87009e-08	2.83712e-06
23166	STAB1	1.24774	9.11286	8.33518	1.87208e-08	2.83712e-06
50861	STMN3	1.34442	8.87355	8.32981	1.89359e-08	2.84465e-06
130940	CCDC148	-1.89434	7.48385	-8.32691	1.90528e-08	2.84465e-06
51192	CKLF	0.783798	9.31176	8.31148	1.96884e-08	2.91793e-06
144402	CPNE8	-0.977715	9.47309	-8.29987	2.01807e-08	2.96906e-06
1326	MAP3K8	1.21377	7.074	8.28818	2.06893e-08	3.01463e-06
3903	LAIR1	2.27895	6.88202	8.28592	2.07895e-08	3.01463e-06
8337	HIST2H2AA3	-1.49137	8.99424	-8.26059	2.19431e-08	3.15918e-06
11041	B3GNT1	-0.73849	11.0913	-8.2521	2.23445e-08	3.19416e-06
220	ALDH1A3	3.02153	7.00065	8.24097	2.28818e-08	3.21552e-06
59	ACTA2	1.30804	11.5476	8.24067	2.28966e-08	3.21552e-06
10894	LYVE1	2.90449	7.06553	8.23912	2.29726e-08	3.21552e-06
9750	FAM65B	-0.983254	7.20557	-8.22622	2.36148e-08	3.28262e-06
57121	LPAR5	2.20344	6.86052	8.20792	2.4558e-08	3.38626e-06
1462	VCAN	2.54848	10.3022	8.20529	2.46964e-08	3.38626e-06
9289	GPR56	1.17783	11.1932	8.1791	2.61223e-08	3.55333e-06
467	ATF3	-1.61307	8.2564	-8.17652	2.62674e-08	3.55333e-06
26585	GREM1	3.06442	4.65723	8.16545	2.68986e-08	3.61445e-06
56261	GPCPD1	-0.772864	8.87766	-8.15599	2.74507e-08	3.66422e-06
1396	CRIP1	1.17146	11.0031	8.14704	2.79838e-08	3.7108e-06
683	BST1	-1.20682	9.34074	-8.14224	2.82739e-08	3.72476e-06
5396	PRRX1	4.67515	6.46277	8.10848	3.04044e-08	3.97942e-06
5328	PLAU	1.32747	8.68893	8.09213	3.14952e-08	4.0956e-06
10184	LHFPL2	1.57679	8.25016	8.0784	3.24422e-08	4.1917e-06
1311	COMP	3.99022	6.8835	8.07374	3.27697e-08	4.20705e-06
8795	TNFRSF10B	0.67665	10.9399	8.02953	3.60562e-08	4.59967e-06
2532	ACKR1	2.83745	6.54852	8.02144	3.66938e-08	4.65158e-06
100506725	LOC100506725	-2.55069	6.35812	-8.01239	3.74198e-08	4.71396e-06
125058	TBC1D16	1.37151	9.41801	8.00384	3.81204e-08	4.77239e-06
1264	CNN1	1.92353	5.26545	7.99453	3.88974e-08	4.8396e-06
57716	PRX	-1.10548	8.18295	-7.99071	3.92216e-08	4.85001e-06
5166	PDK4	-1.44316	10.54	-7.96678	4.13132e-08	5.07749e-06
55803	ADAP2	1.53728	7.77674	7.9349	4.42801e-08	5.40915e-06
3958	LGALS3	1.06834	11.5459	7.92899	4.48542e-08	5.44627e-06
4232	MEST	2.08664	10.0226	7.92332	4.54115e-08	5.48093e-06
84959	UBASH3B	1.24072	7.34406	7.91549	4.61931e-08	5.54208e-06
2213	FCGR2B	2.66575	6.88119	7.88816	4.90315e-08	5.8362e-06
5791	PTPRE	1.34098	8.43632	7.88637	4.92238e-08	5.8362e-06
3624	INHBA	2.70137	9.20946	7.87242	5.07465e-08	5.98156e-06
57534	MIB1	-0.769014	11.0984	-7.86336	5.17615e-08	6.06572e-06
80005	DOCK5	-0.72845	10.7966	-7.83801	5.47151e-08	6.37478e-06
54443	ANLN	2.31832	4.44722	7.82498	5.62993e-08	6.52166e-06
10659	CELF2	1.30549	9.57804	7.80839	5.83854e-08	6.72466e-06
10418	SPON1	3.03528	8.61455	7.79871	5.9639e-08	6.83003e-06
2876	GPX1	0.615066	11.4918	7.78531	6.14214e-08	6.9826e-06
7305	TYROBP	1.43805	10.5917	7.78351	6.16642e-08	6.9826e-06
253782	CERS6	-0.880394	10.5165	-7.77855	6.23405e-08	7.01975e-06
91523	PCED1B	-0.86313	7.3738	-7.77595	6.26973e-08	7.0207e-06
2119	ETV5	0.678154	10.9975	7.76936	6.36131e-08	7.07363e-06
64499	TPSB2	3.49872	6.98038	7.76751	6.38718e-08	7.07363e-06
26002	MOXD1	3.37143	9.21556	7.75318	6.59183e-08	7.26038e-06
2687	GGT5	2.13055	8.72919	7.74244	6.74967e-08	7.39383e-06
7941	PLA2G7	3.70385	6.56987	7.7389	6.80246e-08	7.4097e-06
3587	IL10RA	1.83442	8.06437	7.73656	6.83769e-08	7.4097e-06
5008	OSM	-2.18629	5.04467	-7.72067	7.08145e-08	7.5945e-06
8654	PDE5A	1.39118	8.68749	7.72054	7.08358e-08	7.5945e-06
3910	LAMA4	1.78849	8.97477	7.71702	7.13884e-08	7.61325e-06
79895	ATP8B4	2.06829	4.79713	7.70847	7.27476e-08	7.71737e-06
1234	CCR5	2.25599	4.9029	7.70204	7.37884e-08	7.7868e-06
8483	CILP	2.07146	5.95872	7.68636	7.63882e-08	8.01917e-06
79836	LONRF3	-1.14268	8.31422	-7.68063	7.73631e-08	8.07943e-06
8490	RGS5	1.55975	11.1637	7.61951	8.85799e-08	9.20318e-06
3778	KCNMA1	2.23623	6.9135	7.60801	9.0872e-08	9.34979e-06
26278	SACS	1.02978	9.14232	7.60777	9.09188e-08	9.34979e-06
2736	GLI2	1.47097	5.72883	7.60264	9.19612e-08	9.40898e-06
100505702	LINC01094	2.37812	3.68399	7.59488	9.35617e-08	9.52439e-06
55740	ENAH	0.978196	9.72302	7.58735	9.51403e-08	9.53492e-06
10458	BAIAP2	-0.920973	9.23232	-7.58637	9.53475e-08	9.53492e-06
154089	LINC01312	-2.09072	3.12828	-7.58637	9.53482e-08	9.53492e-06
56998	CTNNBIP1	-1.25242	8.45048	-7.58538	9.55574e-08	9.53492e-06
7097	TLR2	1.49587	7.07228	7.58047	9.6607e-08	9.57e-06
10516	FBLN5	1.90118	8.99727	7.5793	9.68585e-08	9.57e-06
55165	CEP55	2.8528	6.61695	7.57399	9.80102e-08	9.63656e-06
222484	LNX2	-0.995626	9.97864	-7.56188	1.0069e-07	9.83162e-06
2674	GFRA1	2.29684	9.84929	7.56063	1.0097e-07	9.83162e-06
94121	SYTL4	-1.02964	9.10816	-7.54971	1.03456e-07	1.00044e-05
4192	MDK	1.56111	6.96527	7.5485	1.03736e-07	1.00044e-05
3577	CXCR1	-1.7534	5.35765	-7.54567	1.04393e-07	1.00197e-05
23208	SYT11	1.19184	9.42145	7.5404	1.05626e-07	1.00564e-05
3918	LAMC2	2.09639	6.744	7.53883	1.05996e-07	1.00564e-05
4162	MCAM	1.26516	10.4902	7.53767	1.06272e-07	1.00564e-05
1906	EDN1	1.93735	8.50922	7.5317	1.07697e-07	1.00843e-05
8038	ADAM12	2.88253	8.03009	7.53152	1.07739e-07	1.00843e-05
9770	RASSF2	1.35163	9.01635	7.53016	1.08067e-07	1.00843e-05
23387	SIK3	-0.7109	10.3013	-7.5275	1.0871e-07	1.00975e-05
23308	ICOSLG	-1.1379	7.54639	-7.50903	1.13287e-07	1.04284e-05
929	CD14	1.27255	9.37058	7.50893	1.13313e-07	1.04284e-05
4015	LOX	-1.5157	10.6458	-7.50638	1.1396e-07	1.04284e-05
27237	ARHGEF16	-0.818033	6.8789	-7.50488	1.14342e-07	1.04284e-05
5577	PRKAR2B	-1.37212	9.20128	-7.49027	1.1814e-07	1.07262e-05
57484	RNF150	-0.701455	9.27278	-7.48667	1.19095e-07	1.07645e-05
63908	NAPB	-0.648396	9.68345	-7.47739	1.21592e-07	1.09411e-05
2254	FGF9	-1.3071	8.94463	-7.46783	1.24223e-07	1.11281e-05
100132116	ACTA2-AS1	1.58354	5.38225	7.45574	1.27633e-07	1.1383e-05
629	CFB	1.90621	10.2164	7.4495	1.29432e-07	1.14926e-05
727936	GXYLT2	2.02306	8.71929	7.44164	1.31734e-07	1.16458e-05
152007	GLIPR2	1.5299	8.53971	7.43477	1.3378e-07	1.17237e-05
51809	GALNT7	0.798007	9.65333	7.42173	1.37753e-07	1.20197e-05
717	C2	2.08731	7.72053	7.4147	1.39945e-07	1.21583e-05
4239	MFAP4	2.81076	8.38808	7.40378	1.43423e-07	1.2407e-05
3965	LGALS9	1.27028	7.5132	7.39942	1.44835e-07	1.24756e-05
1307	COL16A1	2.11823	7.11688	7.38897	1.4828e-07	1.26813e-05
284677	C1orf204	-1.71389	8.57381	-7.38837	1.48482e-07	1.26813e-05
341	APOC1	3.04696	9.213	7.37959	1.51443e-07	1.28797e-05
55022	PID1	2.24611	8.42433	7.36727	1.55703e-07	1.31864e-05
8793	TNFRSF10D	1.00204	8.28125	7.35502	1.60061e-07	1.34987e-05
26301	GBGT1	1.68944	5.18084	7.33095	1.68993e-07	1.4111e-05
84986	ARHGAP19	-1.34249	10.5895	-7.32983	1.69421e-07	1.4111e-05
858	CAV2	0.978644	10.0916	7.32563	1.71038e-07	1.4187e-05
405754	ERVFRD-1	-2.16416	6.86192	-7.32288	1.72101e-07	1.42167e-05
79772	MCTP1	2.59819	6.51492	7.31315	1.75927e-07	1.44734e-05
1759	DNM1	1.49658	8.53444	7.30529	1.7908e-07	1.46729e-05
11010	GLIPR1	1.05744	9.83677	7.30349	1.79812e-07	1.46732e-05
1295	COL8A1	3.25565	8.84448	7.29919	1.81568e-07	1.4717e-05
2301	FOXE3	-2.29505	4.84197	-7.29861	1.81808e-07	1.4717e-05
56256	SERTAD4	2.27942	7.90447	7.28959	1.85554e-07	1.49176e-05
2192	FBLN1	2.59473	9.3682	7.28892	1.85838e-07	1.49176e-05
6447	SCG5	3.067	8.2701	7.28733	1.86506e-07	1.49176e-05
9647	PPM1F	0.846414	9.99324	7.27934	1.89912e-07	1.51299e-05
23189	KANK1	-0.66989	11.1834	-7.26557	1.95929e-07	1.55478e-05
60681	FKBP10	1.17003	9.2823	7.26044	1.98217e-07	1.56677e-05
55350	VNN3	-1.76933	3.71179	-7.2558	2.00315e-07	1.57581e-05
8445	DYRK2	0.953015	8.69587	7.25446	2.00924e-07	1.57581e-05
5979	RET	2.08068	6.65387	7.24687	2.04413e-07	1.59073e-05
83643	CCDC3	3.56195	8.3268	7.24601	2.04811e-07	1.59073e-05
51435	SCARA3	2.2518	6.42999	7.24412	2.05693e-07	1.59073e-05
79713	IGFLR1	1.01958	7.07798	7.24329	2.0608e-07	1.59073e-05
58475	MS4A7	2.16575	8.63052	7.24181	2.06773e-07	1.59073e-05
257019	FRMD3	-0.922775	11.0127	-7.23945	2.07882e-07	1.59318e-05
7805	LAPTM5	1.00079	10.7048	7.23585	2.0959e-07	1.60019e-05
83483	PLVAP	2.07558	8.02071	7.22714	2.13776e-07	1.62599e-05
10990	LILRB5	2.42778	5.95288	7.22342	2.15589e-07	1.63002e-05
9917	FAM20B	-0.815478	10.6419	-7.22115	2.16706e-07	1.63002e-05
1471	CST3	0.613678	11.321	7.22109	2.16732e-07	1.63002e-05
10360	NPM3	1.18509	7.70501	7.1911	2.32031e-07	1.73215e-05
7832	BTG2	-0.772034	10.584	-7.1825	2.36617e-07	1.75987e-05
6659	SOX4	1.18688	9.84325	7.17827	2.38906e-07	1.77036e-05
92610	TIFA	0.949368	9.37333	7.17657	2.39832e-07	1.77072e-05
2264	FGFR4	-1.04592	8.54739	-7.17108	2.4285e-07	1.78559e-05
1030	CDKN2B	2.20244	7.52444	7.16907	2.43969e-07	1.78559e-05
388610	TRNP1	1.411	8.17096	7.16811	2.44504e-07	1.78559e-05
2774	GNAL	-0.713911	8.24647	-7.16379	2.46923e-07	1.79675e-05
83461	CDCA3	1.60761	5.49914	7.15872	2.4979e-07	1.81107e-05
117583	PARD3B	-1.0579	10.6896	-7.15293	2.53112e-07	1.82858e-05
7003	TEAD1	-0.829024	10.6126	-7.14431	2.58137e-07	1.85447e-05
140	ADORA3	2.00756	5.6251	7.14312	2.58837e-07	1.85447e-05
10194	TSHZ1	-0.717038	10.332	-7.14208	2.59457e-07	1.85447e-05
91683	SYT12	2.39311	6.47645	7.13812	2.61811e-07	1.86468e-05
10123	ARL4C	2.01512	9.71562	7.12991	2.66764e-07	1.87875e-05
27128	CYTH4	1.3529	7.138	7.12912	2.67246e-07	1.87875e-05
286336	FAM78A	1.14639	7.35468	7.12781	2.6805e-07	1.87875e-05
2209	FCGR1A	2.23192	5.18913	7.12716	2.68446e-07	1.87875e-05
631	BFSP1	1.04375	7.37147	7.10764	2.80692e-07	1.95091e-05
4254	KITLG	1.34877	9.55664	7.10128	2.84807e-07	1.97271e-05
2006	ELN	1.90397	7.00193	7.09532	2.88715e-07	1.98952e-05
79626	TNFAIP8L2	1.67435	7.48306	7.09402	2.89573e-07	1.98952e-05
56649	TMPRSS4	2.02016	8.43147	7.09308	2.90196e-07	1.98952e-05
23601	CLEC5A	3.1892	5.77878	7.08624	2.9478e-07	2.0141e-05
54829	ASPN	1.99004	8.50615	7.08466	2.95845e-07	2.01455e-05
26472	PPP1R14B	1.1541	8.50576	7.08156	2.97951e-07	2.01712e-05
9957	HS3ST1	1.89691	6.90028	7.08116	2.98225e-07	2.01712e-05
4839	NOP2	0.711649	7.93859	7.07551	3.02108e-07	2.03372e-05
100507524	ARHGEF26-AS1	-2.2476	5.45299	-7.07467	3.02696e-07	2.03372e-05
10579	TACC2	-0.820399	11.05	-7.06913	3.06559e-07	2.05282e-05
125113	KRT222	3.16571	6.28305	7.06199	3.11618e-07	2.07848e-05
5167	ENPP1	1.43557	8.65817	7.06082	3.12453e-07	2.07848e-05
10468	FST	1.79888	5.44823	7.05765	3.14733e-07	2.08676e-05
57451	TENM2	-1.40496	9.66705	-7.05111	3.19487e-07	2.11134e-05
9891	NUAK1	0.909376	10.2012	7.04779	3.21931e-07	2.12053e-05
9787	DLGAP5	2.97844	4.51319	7.03942	3.28175e-07	2.14763e-05
8477	GPR65	1.39454	7.64388	7.03246	3.33462e-07	2.16815e-05
23014	FBXO21	-0.719549	10.8232	-7.03084	3.34709e-07	2.16926e-05
23649	POLA2	-1.7716	8.79415	-7.02914	3.36016e-07	2.17075e-05
64943	NT5DC2	0.924334	8.13988	7.01395	3.47953e-07	2.24069e-05
7851	MALL	1.80021	8.38635	7.01129	3.50084e-07	2.24282e-05
5091	PC	-1.30898	8.76289	-7.01076	3.5051e-07	2.24282e-05
4306	NR3C2	-0.944301	9.85108	-7.00412	3.55905e-07	2.27013e-05
3207	HOXA11	1.31952	7.2898	6.99971	3.59536e-07	2.28606e-05
3071	NCKAP1L	1.7628	6.90372	6.99419	3.64132e-07	2.30169e-05
4053	LTBP2	1.89772	9.81676	6.9846	3.72254e-07	2.33812e-05
84793	FOXD2-AS1	-1.52607	6.84406	-6.98338	3.73306e-07	2.33812e-05
131583	FAM43A	-1.26279	9.61586	-6.98312	3.73524e-07	2.33812e-05
8707	B3GALT2	-1.94582	9.10696	-6.97102	3.84086e-07	2.39679e-05
5507	PPP1R3C	1.50717	9.7762	6.94844	4.0461e-07	2.51707e-05
58504	ARHGAP22	2.10588	5.97594	6.93853	4.13968e-07	2.56736e-05
126393	HSPB6	2.48285	9.19459	6.92764	4.24513e-07	2.62469e-05
857	CAV1	1.26469	10.0941	6.91897	4.33104e-07	2.66961e-05
219972	MPEG1	1.61469	9.81403	6.91458	4.37517e-07	2.6886e-05
3694	ITGB6	2.60759	9.16281	6.91212	4.40007e-07	2.69568e-05
4830	NME1	1.03974	9.9609	6.90817	4.44047e-07	2.70647e-05
147372	CCBE1	-1.37745	10.2875	-6.90777	4.44454e-07	2.70647e-05
7351	UCP2	1.24873	10.2444	6.90435	4.47991e-07	2.71692e-05
140465	MYL6B	0.630849	10.382	6.9035	4.48866e-07	2.71692e-05
143941	TTC36	-1.27443	5.60486	-6.89065	4.62417e-07	2.79056e-05
5549	PRELP	1.95121	9.25397	6.88837	4.64865e-07	2.79278e-05
219699	UNC5B	1.33798	9.30788	6.88772	4.65556e-07	2.79278e-05
8877	SPHK1	1.55718	5.26087	6.88538	4.68087e-07	2.79963e-05
5999	RGS4	2.95454	9.1365	6.87458	4.79947e-07	2.86207e-05
2762	GMDS	-0.878831	9.19209	-6.87044	4.84573e-07	2.88113e-05
1075	CTSC	1.70884	11.02	6.86599	4.89587e-07	2.8997e-05
155465	AGR3	3.16435	5.03755	6.86198	4.94157e-07	2.91235e-05
8572	PDLIM4	1.51768	9.24838	6.85906	4.97514e-07	2.92359e-05
991	CDC20	1.61095	6.40984	6.85755	4.99266e-07	2.92535e-05
54551	MAGEL2	-1.54851	6.78988	-6.8509	5.07019e-07	2.96213e-05
2151	F2RL2	2.49752	8.35125	6.84866	5.09659e-07	2.96213e-05
84275	SLC25A33	-0.957812	9.27034	-6.84842	5.09951e-07	2.96213e-05
100507507	LOC100507507	1.00845	9.65053	6.84443	5.14695e-07	2.97915e-05
84935	MEDAG	2.28521	6.73925	6.84347	5.15837e-07	2.97915e-05
85439	STON2	-0.939836	10.6166	-6.83979	5.20266e-07	2.99259e-05
7298	TYMS	1.22642	9.31796	6.83907	5.21135e-07	2.99259e-05
5270	SERPINE2	1.53319	10.6421	6.83568	5.25253e-07	2.99946e-05
340578	DCAF12L2	-2.65636	5.90105	-6.83563	5.25307e-07	2.99946e-05
9754	STARD8	-0.851016	8.53722	-6.8336	5.27795e-07	3.00515e-05
1301	COL11A1	3.12214	6.65497	6.83017	5.32011e-07	3.02062e-05
2354	FOSB	-2.2728	6.75881	-6.82646	5.36615e-07	3.03542e-05
12	SERPINA3	4.52064	6.47118	6.82565	5.37629e-07	3.03542e-05
6363	CCL19	4.48062	7.39469	6.82126	5.43135e-07	3.05794e-05
1292	COL6A2	1.73934	7.88958	6.8162	5.49558e-07	3.08548e-05
163882	CNST	-0.658722	9.40082	-6.81479	5.5136e-07	3.087e-05
29128	UHRF1	2.23621	5.84411	6.80867	5.59259e-07	3.12053e-05
115265	DDIT4L	-1.53886	9.44045	-6.80776	5.60445e-07	3.12053e-05
355	FAS	0.779486	9.58451	6.80191	5.68115e-07	3.14586e-05
8869	ST3GAL5	1.06875	8.30234	6.79758	5.73871e-07	3.16903e-05
3691	ITGB4	1.39137	6.45959	6.79369	5.79082e-07	3.18907e-05
1831	TSC22D3	-0.639173	11.6968	-6.76972	6.12322e-07	3.34991e-05
3654	IRAK1	0.627987	9.81185	6.76816	6.14555e-07	3.34991e-05
5031	P2RY6	1.17839	6.90898	6.76789	6.14938e-07	3.34991e-05
7177	TPSAB1	2.86142	7.29601	6.76573	6.18046e-07	3.35777e-05
9641	IKBKE	1.02064	5.80246	6.7643	6.20097e-07	3.35986e-05
51148	CERCAM	1.45294	8.04826	6.76143	6.24259e-07	3.37334e-05
64780	MICAL1	1.08904	8.2477	6.75868	6.28276e-07	3.38024e-05
2589	GALNT1	0.589352	11.0241	6.75826	6.2889e-07	3.38024e-05
25939	SAMHD1	0.752558	10.5802	6.75528	6.33271e-07	3.39316e-05
24147	FJX1	1.35294	7.32096	6.75434	6.3466e-07	3.39316e-05
3003	GZMK	2.13196	7.28444	6.74612	6.46944e-07	3.44969e-05
10319	LAMC3	2.2346	6.6062	6.73983	6.56516e-07	3.48465e-05
9124	PDLIM1	0.613221	11.4277	6.73915	6.5755e-07	3.48465e-05
574036	SERTAD4-AS1	1.72968	7.92868	6.73841	6.58688e-07	3.48465e-05
128414	NKAIN4	2.34432	7.64568	6.73245	6.67919e-07	3.52424e-05
100288198	HMGN3-AS1	-1.08364	8.96573	-6.72848	6.74136e-07	3.54775e-05
56899	ANKS1B	-2.94109	7.19429	-6.72735	6.75919e-07	3.54787e-05
22807	IKZF2	-0.907191	8.69531	-6.7081	7.07012e-07	3.68773e-05
64854	USP46	-1.1846	10.2383	-6.70747	7.08054e-07	3.68773e-05
57214	CEMIP	2.68451	5.17879	6.70377	7.14202e-07	3.71017e-05
30845	EHD3	-1.29039	11.4496	-6.69935	7.21621e-07	3.73907e-05
388588	SMIM1	-1.13815	7.39304	-6.6956	7.27981e-07	3.76236e-05
4070	TACSTD2	1.66723	10.8787	6.68845	7.40256e-07	3.8054e-05
10981	RAB32	1.15859	8.1536	6.68769	7.41571e-07	3.8054e-05
3231	HOXD1	-0.918313	8.50494	-6.68746	7.41974e-07	3.8054e-05
143188	LOC143188	-1.56625	6.40558	-6.67954	7.55854e-07	3.86675e-05
8506	CNTNAP1	1.05625	6.33163	6.67397	7.65771e-07	3.90757e-05
25790	CFAP45	-1.98126	8.58668	-6.6711	7.7094e-07	3.92401e-05
57124	CD248	1.30737	9.31199	6.66412	7.83649e-07	3.97865e-05
29995	LMCD1	0.868245	9.95437	6.65117	8.07793e-07	4.09092e-05
6252	RTN1	1.89958	7.693	6.64862	8.12633e-07	4.09621e-05
11043	MID2	-0.622409	9.18484	-6.64812	8.13588e-07	4.09621e-05
11006	LILRB4	1.49882	5.63223	6.64739	8.14985e-07	4.09621e-05
9201	DCLK1	2.14203	5.93872	6.64635	8.16965e-07	4.09621e-05
79083	MLPH	2.21885	4.94296	6.64397	8.21548e-07	4.09949e-05
7185	TRAF1	1.11588	7.36802	6.64389	8.21688e-07	4.09949e-05
55509	BATF3	1.20012	6.58847	6.64212	8.25118e-07	4.10644e-05
1513	CTSK	1.62356	8.67999	6.64034	8.28561e-07	4.11342e-05
655	BMP7	-0.993713	11.178	-6.63915	8.3087e-07	4.11474e-05
83716	CRISPLD2	1.97302	9.58942	6.63809	8.32947e-07	4.11492e-05
79963	ABCA11P	-0.909562	6.09531	-6.6363	8.36455e-07	4.12215e-05
7043	TGFB3	1.65902	7.74041	6.62601	8.56906e-07	4.20238e-05
1958	EGR1	-0.769192	11.6935	-6.62027	8.68528e-07	4.23909e-05
56911	MAP3K7CL	1.90191	7.73036	6.62023	8.68597e-07	4.23909e-05
22801	ITGA11	2.3039	7.12323	6.61527	8.78772e-07	4.27839e-05
4616	GADD45B	-0.735882	10.3909	-6.61162	8.86339e-07	4.30483e-05
100287525	LOC100287525	0.922355	6.7582	6.6059	8.98332e-07	4.35259e-05
4052	LTBP1	0.692262	11.0152	6.6047	9.0087e-07	4.35442e-05
645369	TMEM200C	-1.19794	10.7595	-6.59867	9.1374e-07	4.40607e-05
11107	PRDM5	-1.47724	6.6743	-6.59368	9.2452e-07	4.44741e-05
11228	RASSF8	-0.779535	10.5786	-6.58964	9.33329e-07	4.47629e-05
139818	DOCK11	1.43647	8.97237	6.5889	9.34966e-07	4.47629e-05
6324	SCN1B	1.18757	6.53053	6.5844	9.44916e-07	4.50694e-05
3800	KIF5C	1.91934	6.64626	6.58357	9.4677e-07	4.50694e-05
147495	APCDD1	2.08883	7.6158	6.58298	9.48077e-07	4.50694e-05
57713	SFMBT2	-0.947184	8.25019	-6.57815	9.58915e-07	4.54774e-05
8792	TNFRSF11A	1.98421	4.63781	6.57669	9.62221e-07	4.55271e-05
347689	SOX2-OT	-3.04118	4.96005	-6.57265	9.71395e-07	4.58535e-05
51176	LEF1	2.20896	7.94126	6.56959	9.78426e-07	4.60339e-05
6532	SLC6A4	-2.4899	6.5985	-6.569	9.79784e-07	4.60339e-05
10052	GJC1	1.08458	8.05516	6.56252	9.94859e-07	4.66334e-05
83872	HMCN1	2.70892	5.89457	6.56133	9.97642e-07	4.66554e-05
3486	IGFBP3	2.07553	10.1068	6.55673	1.00852e-06	4.70547e-05
23171	GPD1L	-0.695356	10.4849	-6.55528	1.01196e-06	4.71063e-05
7706	TRIM25	0.938288	8.87721	6.54856	1.02811e-06	4.76382e-05
283464	GXYLT1	-0.764631	9.98717	-6.54103	1.04652e-06	4.83802e-05
64073	C19orf33	1.72265	8.01214	6.5364	1.05802e-06	4.87996e-05
84525	HOPX	1.24091	10.3758	6.53205	1.06893e-06	4.91903e-05
10783	NEK6	1.03571	8.36481	6.52938	1.07566e-06	4.93874e-05
944	TNFSF8	2.35593	5.55989	6.52695	1.08184e-06	4.94034e-05
27306	HPGDS	3.17658	5.5649	6.52665	1.08262e-06	4.94034e-05
132430	PABPC4L	1.20252	7.38564	6.52636	1.08336e-06	4.94034e-05
84552	PARD6G	-1.10308	11.0845	-6.51957	1.10086e-06	5.00878e-05
9865	TRIL	1.36492	8.38053	6.51577	1.11079e-06	5.01623e-05
240	ALOX5	1.72996	7.24663	6.51563	1.11114e-06	5.01623e-05
151176	FAM132B	2.841	6.38213	6.51548	1.11155e-06	5.01623e-05
6372	CXCL6	3.24584	7.18374	6.51506	1.11265e-06	5.01623e-05
55723	ASF1B	1.70088	5.86687	6.51419	1.11494e-06	5.01623e-05
1356	CP	2.64514	7.82638	6.51182	1.12117e-06	5.03305e-05
259307	IL4I1	1.63478	5.99569	6.49659	1.16225e-06	5.20585e-05
1382	CRABP2	1.48503	6.06313	6.49236	1.17392e-06	5.23957e-05
26084	ARHGEF26	-1.4306	9.96251	-6.4913	1.17686e-06	5.23957e-05
6097	RORC	-1.61051	7.41641	-6.49103	1.17762e-06	5.23957e-05
57452	GALNT16	2.64467	7.07726	6.49011	1.18018e-06	5.23957e-05
5427	POLE2	1.35658	6.1877	6.48743	1.18768e-06	5.2613e-05
64866	CDCP1	2.10486	5.87674	6.48196	1.20315e-06	5.30649e-05
4741	NEFM	2.83896	5.5191	6.47582	1.22073e-06	5.36059e-05
10095	ARPC1B	0.863155	9.79696	6.46878	1.24125e-06	5.43698e-05
130120	REG3G	3.29682	5.44316	6.4672	1.2459e-06	5.43698e-05
130733	TMEM178A	-1.33177	10.9135	-6.46709	1.24622e-06	5.43698e-05
114794	ELFN2	2.38038	5.85209	6.46517	1.25191e-06	5.44999e-05
29015	SLC43A3	0.985173	8.49495	6.46068	1.26528e-06	5.49633e-05
84057	MND1	2.31652	4.89789	6.45625	1.2786e-06	5.54227e-05
1104	RCC1	0.899689	7.19777	6.45311	1.28817e-06	5.56336e-05
971	CD72	1.3495	5.4484	6.45284	1.28899e-06	5.56336e-05
55752	SEPT11	-0.586253	11.368	-6.45088	1.29497e-06	5.57724e-05
283208	P4HA3	2.00554	5.49303	6.43994	1.32898e-06	5.69935e-05
3164	NR4A1	-1.36195	7.20214	-6.43485	1.3451e-06	5.74404e-05
645638	WFDC21P	2.18819	6.61942	6.43369	1.3488e-06	5.74765e-05
55301	OLAH	-1.89627	6.15375	-6.42781	1.36774e-06	5.81607e-05
54360	CYTL1	2.82124	5.29878	6.42565	1.37474e-06	5.83355e-05
9037	SEMA5A	-0.782966	11.641	-6.42276	1.3842e-06	5.86133e-05
199	AIF1	-0.604392	12.6009	-6.41884	1.39715e-06	5.90377e-05
23224	SYNE2	-0.757468	10.6	-6.41792	1.4002e-06	5.90428e-05
22974	TPX2	2.38235	5.04706	6.40482	1.44442e-06	6.07803e-05
2207	FCER1G	1.35791	10.5216	6.40394	1.44744e-06	6.07805e-05
6768	ST14	1.33082	8.32063	6.40057	1.45904e-06	6.09894e-05
874	CBR3	1.332	8.69612	6.39602	1.47491e-06	6.12216e-05
9232	PTTG1	1.82405	7.90663	6.39573	1.47593e-06	6.12216e-05
10544	PROCR	0.975303	8.97027	6.3903	1.49509e-06	6.17521e-05
79630	C1orf54	0.721914	10.9543	6.38242	1.52335e-06	6.27905e-05
132625	ZFP42	-1.60531	5.85491	-6.37528	1.54941e-06	6.36047e-05
5990	RFX2	0.907698	6.8634	6.37294	1.55805e-06	6.37398e-05
440087	SMCO3	-1.25856	9.73294	-6.37257	1.55943e-06	6.37398e-05
64101	LRRC4	-1.33467	8.08928	-6.37182	1.56219e-06	6.37398e-05
51303	FKBP11	0.950097	9.53299	6.3688	1.57344e-06	6.40692e-05
84561	SLC12A8	1.27842	6.67589	6.3573	1.61708e-06	6.56015e-05
53831	GPR84	1.87381	3.82504	6.35717	1.61758e-06	6.56015e-05
83742	MARVELD1	0.799537	10.5257	6.35204	1.63747e-06	6.61979e-05
983	CDK1	1.11303	7.24559	6.35168	1.63885e-06	6.61979e-05
89857	KLHL6	1.54909	4.70168	6.3484	1.65171e-06	6.65421e-05
3484	IGFBP1	3.23303	7.87941	6.34782	1.65398e-06	6.65421e-05
221472	FGD2	1.41006	10.7345	6.34649	1.65923e-06	6.66205e-05
2760	GM2A	0.783816	10.6003	6.33899	1.68913e-06	6.75887e-05
4360	MRC1	1.64027	9.66502	6.33811	1.69268e-06	6.75887e-05
116372	LYPD1	3.33525	7.85803	6.33793	1.69341e-06	6.75887e-05
54997	TESC	1.45864	7.26191	6.33253	1.71533e-06	6.83238e-05
883	CCBL1	-1.2149	8.06757	-6.33173	1.7186e-06	6.83238e-05
1515	CTSV	-1.9766	10.5103	-6.32367	1.75192e-06	6.93748e-05
51659	GINS2	1.68644	6.67274	6.32173	1.76003e-06	6.95593e-05
114990	VASN	-1.0276	9.26662	-6.31715	1.77935e-06	7.00531e-05
55796	MBNL3	-0.726332	9.67733	-6.31698	1.78008e-06	7.00531e-05
100288413	ERVMER34-1	-1.70688	6.72266	-6.3163	1.78295e-06	7.00531e-05
1503	CTPS1	0.866639	8.48495	6.31039	1.80824e-06	7.09085e-05
25777	SUN2	-0.68924	10.2563	-6.30849	1.81648e-06	7.10932e-05
4316	MMP7	2.62764	10.3892	6.30619	1.82646e-06	7.13452e-05
81539	SLC38A1	1.61701	9.35489	6.30106	1.84893e-06	7.20833e-05
90355	C5orf30	-0.654531	9.45812	-6.29799	1.86255e-06	7.24739e-05
1008	CDH10	-3.40279	5.46075	-6.29073	1.89511e-06	7.35988e-05
57168	ASPHD2	1.40859	6.84072	6.28719	1.91118e-06	7.3938e-05
81792	ADAMTS12	2.77545	6.02237	6.28403	1.92563e-06	7.43006e-05
5592	PRKG1	-0.848637	9.76992	-6.28354	1.92792e-06	7.43006e-05
1291	COL6A1	0.817875	10.1827	6.27964	1.94593e-06	7.48515e-05
3875	KRT18	1.20997	10.8595	6.27531	1.96617e-06	7.54648e-05
163589	TDRD5	-1.8991	4.92731	-6.27463	1.96936e-06	7.54648e-05
58529	MYOZ1	-1.66825	7.32463	-6.27156	1.98388e-06	7.58767e-05
79762	C1orf115	-0.753192	10.6477	-6.26535	2.01351e-06	7.68553e-05
2131	EXT1	0.689798	10.1221	6.26375	2.02121e-06	7.68553e-05
389792	IER5L	1.00359	6.88904	6.26337	2.02306e-06	7.68553e-05
7139	TNNT2	-1.27894	11.2519	-6.26303	2.02471e-06	7.68553e-05
4237	MFAP2	1.91183	7.24967	6.26182	2.03059e-06	7.69333e-05
56704	JPH1	-1.61715	8.04255	-6.25632	2.05743e-06	7.75913e-05
221178	SPATA13	-0.747329	10.4175	-6.2559	2.0595e-06	7.75913e-05
3579	CXCR2	-2.11876	6.53152	-6.25256	2.07605e-06	7.80689e-05
55297	CCDC91	-0.983623	10.0724	-6.25055	2.08603e-06	7.82978e-05
125488	TTC39C	1.71695	7.83512	6.24683	2.1047e-06	7.88518e-05
284023	LOC284023	-0.638612	9.50933	-6.2371	2.15426e-06	8.03076e-05
3912	LAMB1	0.970936	11.0576	6.2366	2.15681e-06	8.03076e-05
9145	SYNGR1	1.1394	7.9623	6.23608	2.15949e-06	8.03076e-05
220965	FAM13C	1.82337	7.88978	6.23423	2.16907e-06	8.04204e-05
643911	CRNDE	1.16996	9.09527	6.22929	2.19488e-06	8.10257e-05
25780	RASGRP3	-0.717509	11.1074	-6.22755	2.20403e-06	8.11128e-05
54757	FAM20A	1.39389	6.23296	6.22636	2.21033e-06	8.11128e-05
3899	AFF3	1.57925	7.83722	6.22625	2.21092e-06	8.11128e-05
11249	NXPH2	-3.15586	6.84646	-6.2251	2.21702e-06	8.11128e-05
4828	NMB	1.13567	7.58749	6.22434	2.22106e-06	8.11128e-05
10769	PLK2	1.13188	9.36798	6.22322	2.22701e-06	8.11128e-05
81578	COL21A1	1.30323	7.99906	6.22277	2.22944e-06	8.11128e-05
125	ADH1B	2.29212	9.48774	6.22087	2.23956e-06	8.13345e-05
57333	RCN3	1.18164	7.70645	6.21733	2.25863e-06	8.18795e-05
2009	EML1	-0.739114	9.8362	-6.20132	2.34696e-06	8.49286e-05
4057	LTF	3.43948	9.2982	6.18874	2.41883e-06	8.73725e-05
5214	PFKP	1.2988	9.95568	6.18476	2.44205e-06	8.77294e-05
701	BUB1B	1.43906	5.43026	6.18332	2.45047e-06	8.77294e-05
286161	LOC286161	-0.76917	9.15505	-6.18067	2.46615e-06	8.79784e-05
64398	MPP5	-0.977734	11.5214	-6.1789	2.47664e-06	8.81963e-05
7869	SEMA3B	-1.10984	10.4256	-6.17585	2.4948e-06	8.86865e-05
1063	CENPF	1.9732	5.95234	6.17245	2.51526e-06	8.92563e-05
5967	REG1A	5.1794	7.16805	6.17153	2.5208e-06	8.92955e-05
5058	PAK1	-0.782248	10.8857	-6.16424	2.56534e-06	9.0714e-05
23066	CAND2	-0.668574	11.3107	-6.14706	2.67338e-06	9.43688e-05
79725	THAP9	-0.641409	7.37524	-6.14499	2.68672e-06	9.46217e-05
92949	ADAMTSL1	2.16202	6.77782	6.14449	2.68993e-06	9.46217e-05
7135	TNNI1	-2.04678	10.2701	-6.13289	2.76601e-06	9.70759e-05
1031	CDKN2C	0.900908	6.85195	6.13239	2.76933e-06	9.70759e-05
9023	CH25H	2.97403	5.92788	6.12897	2.79219e-06	9.77071e-05
3955	LFNG	0.778979	10.3933	6.12251	2.83597e-06	9.90671e-05
144423	GLT1D1	-1.44732	4.98352	-6.11739	2.8711e-06	9.9948e-05
729230	CCR2	2.44643	6.77748	6.11417	2.8934e-06	0.000100551
23138	N4BP3	1.82875	4.98321	6.11055	2.91871e-06	0.000101058
2307	FOXS1	1.76621	7.04818	6.10946	2.92638e-06	0.000101058
49861	CLDN20	-2.78513	7.04392	-6.1093	2.92753e-06	0.000101058
23767	FLRT3	-0.793288	11.224	-6.10923	2.92806e-06	0.000101058
91750	LIN52	-0.795257	8.68932	-6.10358	2.96812e-06	0.000102266
285598	ARL10	0.753211	8.95823	6.09289	3.04552e-06	0.000104753
100505592	LINC01540	1.72663	4.27216	6.0883	3.07941e-06	0.000105739
5806	PTX3	2.7206	6.13792	6.08704	3.08872e-06	0.000105835
8091	HMGA2	2.31515	4.54382	6.08453	3.1075e-06	0.000106161
51673	TPPP3	-1.15906	11.5309	-6.0801	3.14085e-06	0.000107118
286071	LOC286071	-1.19939	6.77353	-6.07893	3.14968e-06	0.000107238
285172	FAM126B	-0.628776	9.27765	-6.07619	3.17059e-06	0.000107508
753	LDLRAD4	0.856956	8.93396	6.07519	3.1782e-06	0.000107508
161145	TMEM229B	-0.813159	8.31924	-6.07515	3.17853e-06	0.000107508
27122	DKK3	0.766855	11.9678	6.07468	3.18213e-06	0.000107508
2863	GPR39	2.59694	7.93731	6.07318	3.19364e-06	0.000107644
55075	UACA	-0.653142	11.4929	-6.07049	3.21442e-06	0.000108163
51155	HN1	0.657961	10.5716	6.06497	3.25751e-06	0.000109182
87769	GGACT	-2.13318	6.76695	-6.06472	3.25952e-06	0.000109182
55182	RNF220	-0.757506	11.0706	-6.06454	3.26094e-06	0.000109182
7086	TKT	0.659638	10.8648	6.06038	3.29376e-06	0.000109985
55742	PARVA	-0.662328	11.0488	-6.06012	3.29585e-06	0.000109985
6444	SGCD	1.80708	5.87772	6.057	3.32077e-06	0.000110451
79778	MICALL2	1.07272	7.09056	6.05562	3.33187e-06	0.000110638
27036	SIGLEC7	1.81504	6.14837	6.05429	3.34252e-06	0.000110778
1536	CYBB	1.90858	7.70098	6.05048	3.37338e-06	0.000111283
1004	CDH6	1.90139	10.7558	6.04477	3.42026e-06	0.000112505
157	ADRBK2	-1.11143	9.50854	-6.04419	3.42501e-06	0.000112505
948	CD36	2.37664	7.95659	6.04362	3.42976e-06	0.000112505
83999	KREMEN1	-0.834217	8.95088	-6.04326	3.43276e-06	0.000112505
23452	ANGPTL2	1.42352	8.44107	6.04117	3.45007e-06	0.00011277
101929454	LOC101929454	-2.14717	5.11645	-6.02695	3.57065e-06	0.000115857
1740	DLG2	-1.44032	9.77957	-6.02671	3.5727e-06	0.000115857
9920	KBTBD11	-1.05981	10.9266	-6.02641	3.57526e-06	0.000115857
7130	TNFAIP6	2.17406	6.27698	6.02057	3.62605e-06	0.000117314
27286	SRPX2	2.05388	6.84717	6.00733	3.744e-06	0.000120561
113452	TMEM54	0.90505	8.29778	6.00679	3.74891e-06	0.000120561
29904	EEF2K	0.643301	8.93127	6.00663	3.75035e-06	0.000120561
4064	CD180	1.534	6.95964	6.00312	3.78237e-06	0.000121397
5831	PYCR1	1.14248	5.16344	5.99797	3.82971e-06	0.000122332
7125	TNNC2	-1.03302	5.17244	-5.99546	3.85309e-06	0.000122884
25903	OLFML2B	2.12301	7.082	5.99467	3.86045e-06	0.000122924
283481	FGF14-AS2	-0.791673	9.14739	-5.99045	3.90003e-06	0.000123794
27004	TCL6	-1.74743	6.37825	-5.98774	3.92572e-06	0.000124413
3280	HES1	-0.949198	10.6128	-5.98549	3.94716e-06	0.000124896
10212	DDX39A	0.702312	8.99706	5.98462	3.95551e-06	0.000124964
5784	PTPN14	-0.830435	10.4325	-5.98039	3.99617e-06	0.000126051
7378	UPP1	0.741944	8.90225	5.97319	4.06647e-06	0.00012783
112464	PRKCDBP	1.31921	8.39686	5.97246	4.07365e-06	0.00012783
113622	ADPRHL1	-0.883555	5.55437	-5.97203	4.07791e-06	0.00012783
2331	FMOD	2.2278	7.39793	5.96992	4.09874e-06	0.000128283
5981	RFC1	-0.653299	9.43479	-5.96853	4.11257e-06	0.000128516
3615	IMPDH2	0.704738	10.9012	5.9656	4.1419e-06	0.000129232
284217	LAMA1	1.46801	5.65069	5.96128	4.18548e-06	0.00013039
4233	MET	1.0909	10.3408	5.96043	4.19404e-06	0.000130455
2982	GUCY1A3	0.849701	10.5244	5.95928	4.20579e-06	0.000130619
285533	RNF175	1.48221	7.18079	5.95401	4.25978e-06	0.00013189
6273	S100A2	1.72085	10.4888	5.95249	4.27552e-06	0.000132174
26136	TES	0.770096	10.2466	5.95079	4.29321e-06	0.000132518
894	CCND2	1.13882	11.0702	5.94895	4.3124e-06	0.000132748
11035	RIPK3	1.27236	6.14774	5.94881	4.31386e-06	0.000132748
9536	PTGES	2.21182	7.90345	5.94532	4.35051e-06	0.000133672
9997	SCO2	1.03013	8.52525	5.94449	4.35926e-06	0.000133737
79850	FAM57A	0.773039	7.72948	5.9434	4.37078e-06	0.000133887
7855	FZD5	-0.929044	9.3294	-5.94175	4.38831e-06	0.00013422
10351	ABCA8	2.08707	8.67018	5.93877	4.42011e-06	0.000134783
6285	S100B	2.04045	4.77747	5.93655	4.44403e-06	0.000135271
29122	PRSS50	-1.37337	6.1418	-5.93604	4.44952e-06	0.000135271
7049	TGFBR3	-0.728344	11.5769	-5.93525	4.45801e-06	0.000135325
85407	NKD1	-1.53827	8.61259	-5.93357	4.47628e-06	0.000135627
1794	DOCK2	1.3098	6.72958	5.93309	4.48142e-06	0.000135627
2146	EZH2	1.08807	7.39322	5.92378	4.58385e-06	0.000138277
8412	BCAR3	-0.738377	9.49558	-5.92327	4.58956e-06	0.000138277
101669762	BLACAT1	1.37687	4.00611	5.92172	4.60685e-06	0.000138591
8850	KAT2B	-0.685839	9.89201	-5.92084	4.61662e-06	0.000138677
332	BIRC5	2.11121	7.60457	5.92008	4.62515e-06	0.000138727
6533	SLC6A6	0.620902	11.4297	5.91547	4.67727e-06	0.000140082
10635	RAD51AP1	1.33997	6.09869	5.9142	4.69167e-06	0.000140305
1380	CR2	-1.55774	6.19624	-5.9123	4.71339e-06	0.000140745
23460	ABCA6	2.01209	5.52389	5.90866	4.75515e-06	0.000141573
29767	TMOD2	-0.930974	9.92508	-5.90646	4.78062e-06	0.000141866
64098	PARVG	1.72388	7.52229	5.90599	4.78611e-06	0.000141866
339524	LINC01140	2.04189	7.12923	5.90519	4.79545e-06	0.000141934
23704	KCNE4	1.1319	8.71412	5.90239	4.82812e-06	0.000142483
222663	SCUBE3	1.94591	7.44448	5.89479	4.91813e-06	0.000144715
100505881	MAGI2-AS3	-0.807065	11.2828	-5.89248	4.94575e-06	0.000145316
963	CD53	1.14901	10.1391	5.88884	4.98978e-06	0.000146183
338773	TMEM119	3.10229	5.66205	5.88754	5.00547e-06	0.00014643
24137	KIF4A	1.97629	5.48838	5.8867	5.0157e-06	0.000146517
79864	C11orf63	-1.00278	7.52094	-5.8793	5.10671e-06	0.000148744
93517	SDR42E1	-0.994406	7.82615	-5.87782	5.12516e-06	0.000149066
9263	STK17A	0.971685	8.26598	5.87664	5.13993e-06	0.00014928
11096	ADAMTS5	0.760445	10.5419	5.87556	5.15343e-06	0.000149398
50509	COL5A3	1.55558	5.24133	5.87513	5.1588e-06	0.000149398
150	ADRA2A	3.18634	6.91965	5.86855	5.24207e-06	0.000151372
10551	AGR2	3.38089	7.48744	5.86441	5.295e-06	0.000152466
3656	IRAK2	0.701829	8.89739	5.86205	5.32554e-06	0.000152785
64321	SOX17	1.05544	9.37512	5.86143	5.33359e-06	0.000152785
3880	KRT19	2.28694	10.7718	5.86121	5.33639e-06	0.000152785
84966	IGSF21	1.62817	5.46152	5.85864	5.36997e-06	0.000153528
4854	NOTCH3	0.93015	10.5657	5.85755	5.38419e-06	0.000153716
79075	DSCC1	0.694609	7.95974	5.85099	5.47076e-06	0.000155966
4693	NDP	1.47219	4.72089	5.85042	5.47847e-06	0.000155966
2591	GALNT3	1.65118	7.63763	5.846	5.53764e-06	0.000157419
25907	TMEM158	1.62974	5.17206	5.84545	5.54513e-06	0.000157419
22903	BTBD3	-0.771564	10.4288	-5.8445	5.55787e-06	0.000157559
9796	PHYHIP	-1.59144	10.0606	-5.8435	5.57153e-06	0.000157656
8744	TNFSF9	1.07155	4.95186	5.8431	5.57694e-06	0.000157656
634	CEACAM1	-1.20103	9.94269	-5.84242	5.58613e-06	0.000157695
284723	SLC25A34	-1.45606	8.29413	-5.84163	5.59696e-06	0.000157779
9853	RUSC2	-0.719021	8.31576	-5.83893	5.63381e-06	0.000158597
50652	PCA3	-0.90937	2.82169	-5.82992	5.75884e-06	0.000161798
7564	ZNF16	-0.882016	8.93016	-5.82958	5.7636e-06	0.000161798
3514	IGKC	2.13824	9.69283	5.82412	5.84079e-06	0.00016351
116443	GRIN3A	-2.037	4.76627	-5.82211	5.86937e-06	0.000164082
25797	QPCT	1.15879	9.11748	5.82139	5.87966e-06	0.000164142
91584	PLXNA4	-1.17736	6.42221	-5.81921	5.91102e-06	0.000164789
8612	PPAP2C	1.33352	6.18202	5.81654	5.94964e-06	0.000165637
23657	SLC7A11	2.15616	5.02777	5.81474	5.97579e-06	0.000166135
1770	DNAH9	-1.26321	7.68612	-5.81332	5.99649e-06	0.000166481
79148	MMP28	-0.896643	8.03576	-5.80661	6.0954e-06	0.000168518
114898	C1QTNF2	0.968899	4.87709	5.8058	6.10751e-06	0.000168518
5865	RAB3B	2.54461	6.0994	5.80552	6.11165e-06	0.000168518
57159	TRIM54	-1.47329	7.29448	-5.79921	6.20646e-06	0.000170898
3070	HELLS	1.28947	5.88954	5.7968	6.24303e-06	0.00017138
688	KLF5	1.30674	7.97158	5.79645	6.24835e-06	0.00017138
2535	FZD2	-1.3473	8.02155	-5.79638	6.24945e-06	0.00017138
2026	ENO2	0.881886	8.40098	5.79378	6.28914e-06	0.000172
90332	EXOC3L2	-1.0035	8.86935	-5.79179	6.31971e-06	0.000172602
10587	TXNRD2	-0.904503	8.41913	-5.791	6.33198e-06	0.000172703
6558	SLC12A2	0.902233	9.60048	5.78835	6.37305e-06	0.000173588
54084	TSPEAR	-1.72409	4.91308	-5.78572	6.41401e-06	0.000173949
55187	VPS13D	-0.744854	8.83095	-5.78529	6.4208e-06	0.000173949
822	CAPG	1.55394	9.35629	5.78056	6.49538e-06	0.000175497
10462	CLEC10A	1.66569	6.144	5.77975	6.50823e-06	0.000175609
4919	ROR1	1.08924	6.46369	5.77783	6.53873e-06	0.000176196
57291	DANCR	-0.593894	11.2391	-5.77625	6.56401e-06	0.000176597
9863	MAGI2	-1.10502	11.029	-5.77581	6.57112e-06	0.000176597
1804	DPP6	-1.5125	11.5917	-5.77455	6.59134e-06	0.000176814
57502	NLGN4X	2.23462	5.40768	5.76899	6.68135e-06	0.00017837
145853	C15orf61	-0.694343	8.97624	-5.76823	6.69384e-06	0.000178467
1902	LPAR1	2.47801	8.50978	5.76319	6.77673e-06	0.000180438
6662	SOX9	1.93296	8.91385	5.76247	6.7886e-06	0.000180516
6241	RRM2	2.05691	7.26373	5.75993	6.8308e-06	0.000181369
100113407	TMEM170B	-0.859393	8.74313	-5.75893	6.84754e-06	0.000181369
2048	EPHB2	2.53902	6.94239	5.75892	6.84768e-06	0.000181369
1832	DSP	1.36316	10.0228	5.75645	6.88919e-06	0.000182229
9970	NR1I3	-2.14281	5.62837	-5.73821	7.20315e-06	0.000190284
10370	CITED2	-0.747598	10.6953	-5.7305	7.34021e-06	0.000193651
3305	HSPA1L	-0.797366	6.4234	-5.72688	7.40558e-06	0.000194929
23255	MTCL1	1.41633	7.14197	5.7251	7.43788e-06	0.00019546
3537	IGLC1	2.40306	11.3882	5.72352	7.46668e-06	0.000195695
100379345	MIR181A2HG	1.57546	6.23845	5.71478	7.62802e-06	0.000199159
23645	PPP1R15A	-0.863005	7.68668	-5.70587	7.79611e-06	0.000203021
93185	IGSF8	-0.821663	7.63404	-5.70498	7.81327e-06	0.000203205
375295	LINC01116	1.22748	8.69718	5.70027	7.90383e-06	0.000204557
150372	NFAM1	1.00367	6.75527	5.70016	7.90584e-06	0.000204557
9495	AKAP5	1.52023	7.89971	5.69844	7.93925e-06	0.000205144
8797	TNFRSF10A	1.43729	7.63541	5.69795	7.94886e-06	0.000205144
9241	NOG	1.56118	6.25539	5.68661	8.1727e-06	0.000210382
8434	RECK	-0.617482	9.37668	-5.68608	8.18328e-06	0.000210385
256987	SERINC5	-0.644885	10.8988	-5.68438	8.21738e-06	0.000210725
767811	H2BFXP	1.4977	6.36133	5.6832	8.24124e-06	0.000211068
54790	TET2	-0.763914	8.65611	-5.6777	8.35307e-06	0.00021366
51352	WT1-AS	-1.58531	9.16992	-5.67234	8.4634e-06	0.000215662
3710	ITPR3	0.959708	7.96914	5.66563	8.60373e-06	0.00021853
128346	C1orf162	1.2268	8.87318	5.66541	8.60848e-06	0.00021853
55635	DEPDC1	1.73204	4.59355	5.6638	8.6425e-06	0.000218856
11178	LZTS1	0.864082	6.92778	5.66377	8.64303e-06	0.000218856
2152	F3	-0.806657	11.6591	-5.66229	8.67454e-06	0.000219378
144501	KRT80	1.74524	6.34125	5.66036	8.71573e-06	0.000220143
4921	DDR2	0.992081	9.30398	5.6565	8.79849e-06	0.000221851
1950	EGF	-2.56628	7.98403	-5.65619	8.80534e-06	0.000221851
4288	MKI67	1.47825	5.36395	5.65539	8.82248e-06	0.000221876
7070	THY1	0.969136	11.1753	5.65512	8.82835e-06	0.000221876
64782	AEN	0.781369	7.49474	5.65346	8.8645e-06	0.00022223
414328	IDNK	-0.864022	8.41067	-5.65013	8.93713e-06	0.000223772
11234	HPS5	-0.845792	10.1343	-5.64617	9.02435e-06	0.000225676
2328	FMO3	2.65612	7.56747	5.64032	9.1547e-06	0.000228652
6452	SH3BP2	1.07916	9.30521	5.63778	9.21206e-06	0.0002298
5409	PNMT	-0.747816	5.01519	-5.63693	9.23124e-06	0.000229994
221981	THSD7A	-1.10577	11.2087	-5.63494	9.27636e-06	0.000230631
79987	SVEP1	2.78945	6.73147	5.6348	9.2797e-06	0.000230631
6424	SFRP4	3.69587	6.03918	5.6341	9.29546e-06	0.000230663
1281	COL3A1	0.786647	11.6041	5.63374	9.30386e-06	0.000230663
728215	FAM155A	1.74567	7.25297	5.62856	9.42289e-06	0.000232755
1580	CYP4B1	-2.52832	5.27705	-5.62685	9.46243e-06	0.000233364
4773	NFATC2	1.10601	8.90919	5.62649	9.47073e-06	0.000233364
7772	ZNF229	-0.850555	6.88018	-5.62144	9.58891e-06	0.000235988
116496	FAM129A	0.730872	10.5835	5.61813	9.66713e-06	0.000237623
2568	GABRP	3.07607	5.1451	5.61752	9.68167e-06	0.00023769
4982	TNFRSF11B	1.02054	9.1552	5.6154	9.73234e-06	0.000238644
1365	CLDN3	0.81848	6.72482	5.61424	9.76009e-06	0.000238783
53335	BCL11A	1.58978	5.40897	5.61417	9.76172e-06	0.000238783
3752	KCND3	-1.07748	10.3514	-5.61222	9.80862e-06	0.00023964
57188	ADAMTSL3	2.45882	5.42385	5.60921	9.88123e-06	0.000241121
6504	SLAMF1	1.46174	5.23368	5.60728	9.92837e-06	0.000241979
1735	DIO3	-1.0019	5.30934	-5.60094	1.00841e-05	0.000244885
7433	VIPR1	-2.05701	8.23946	-5.59873	1.01392e-05	0.000245927
65244	SPATS2	0.615439	8.91393	5.59678	1.01878e-05	0.00024681
57559	STAMBPL1	1.48517	8.36716	5.59609	1.0205e-05	0.000246929
3791	KDR	-1.04584	10.7262	-5.59444	1.02466e-05	0.00024764
1643	DDB2	0.791744	8.52952	5.59201	1.0308e-05	0.000248525
79805	VASH2	1.47666	5.70891	5.59022	1.03532e-05	0.000249048
646450	ARIH2OS	-0.839801	6.8224	-5.59018	1.03544e-05	0.000249048
388939	C2orf71	-1.92425	6.36157	-5.58951	1.03714e-05	0.000249161
143903	LAYN	1.0805	8.41871	5.58402	1.05124e-05	0.000252049
815	CAMK2A	-1.26019	6.65364	-5.58302	1.05384e-05	0.000252049
2162	F13A1	1.30893	8.91378	5.58289	1.05416e-05	0.000252049
79981	FRMD1	-1.4226	8.62914	-5.58188	1.05677e-05	0.000252374
8404	SPARCL1	1.30193	10.3416	5.5771	1.06928e-05	0.000255057
84807	NFKBID	1.05603	5.65484	5.56933	1.08992e-05	0.000258843
10870	HCST	1.38402	7.86008	5.56919	1.09029e-05	0.000258843
51363	CHST15	1.27866	8.74352	5.56724	1.09553e-05	0.000259782
6327	SCN2B	-1.50331	6.79025	-5.5601	1.11495e-05	0.000263766
23492	CBX7	-0.64411	10.74	-5.55638	1.12519e-05	0.000265877
9133	CCNB2	1.38022	6.09315	5.55438	1.13075e-05	0.000266879
143425	SYT9	-1.4	7.60248	-5.55291	1.13484e-05	0.00026753
2275	FHL3	0.647432	5.45911	5.54459	1.15833e-05	0.000272749
10129	FRY	-0.730111	11.383	-5.54394	1.16018e-05	0.000272866
151790	WDR49	-2.74687	6.06693	-5.53757	1.17852e-05	0.000276856
146225	CMTM2	-1.65624	6.00424	-5.53695	1.18033e-05	0.000276959
146330	FBXL16	1.52035	6.45253	5.5312	1.19715e-05	0.000280252
157562	LOC157562	-0.621614	6.85913	-5.52838	1.2055e-05	0.000281629
1040	CDS1	-0.680645	9.91674	-5.52827	1.20582e-05	0.000281629
100506119	LINC01503	1.37984	8.39307	5.52309	1.22131e-05	0.000284586
4303	FOXO4	-0.752927	9.27425	-5.50932	1.26348e-05	0.000293051
84976	DISP1	-0.712878	9.79483	-5.50886	1.2649e-05	0.000293051
94031	HTRA3	-0.756641	6.44895	-5.50525	1.2762e-05	0.000295231
58986	TMEM8A	0.735613	8.72845	5.50492	1.27724e-05	0.000295231
8092	ALX1	1.54814	4.92083	5.50433	1.2791e-05	0.000295322
10848	PPP1R13L	1.18641	7.46609	5.50358	1.28146e-05	0.000295527
399726	CASC10	-0.787115	8.69434	-5.50097	1.28973e-05	0.000296755
5724	PTAFR	1.58201	6.72704	5.49615	1.30516e-05	0.000299895
2306	FOXD2	-1.23199	6.71845	-5.49578	1.30635e-05	0.000299895
942	CD86	1.81665	7.02184	5.49473	1.30973e-05	0.000300329
541565	C8orf58	-0.891927	9.76533	-5.49351	1.31369e-05	0.000300894
10529	NEBL	-0.701788	11.9566	-5.49128	1.32092e-05	0.000302206
10626	TRIM16	1.01397	7.7398	5.4869	1.33528e-05	0.000305146
1474	CST6	2.082	7.0839	5.48544	1.3401e-05	0.0003059
9245	GCNT3	1.9246	5.4875	5.47969	1.35923e-05	0.000308871
23371	TENC1	-0.759459	11.1615	-5.47969	1.35924e-05	0.000308871
116535	MRGPRF	-0.968443	9.84981	-5.47878	1.3623e-05	0.000309107
100288637	LOC100288637	1.1515	4.97476	5.47847	1.36335e-05	0.000309107
5664	PSEN2	-0.585228	10.2923	-5.47491	1.37538e-05	0.000311484
100506013	APELA	-3.33945	4.85368	-5.47432	1.37737e-05	0.000311585
7096	TLR1	1.19516	7.28867	5.47372	1.3794e-05	0.000311694
25878	MXRA5	1.60848	9.11656	5.47109	1.38839e-05	0.000313374
4756	NEO1	-0.602748	8.44351	-5.46942	1.39413e-05	0.000314318
83442	SH3BGRL3	0.627695	11.1677	5.46664	1.40372e-05	0.000315774
6357	CCL13	2.52337	7.16183	5.46549	1.40772e-05	0.000316321
9046	DOK2	1.06975	6.73847	5.46386	1.41337e-05	0.000316885
4643	MYO1E	-0.746399	9.71527	-5.4614	1.42201e-05	0.000318467
3689	ITGB2	1.25377	9.52165	5.45911	1.43007e-05	0.000319918
147948	ZNF582	-0.666227	6.28287	-5.45843	1.43245e-05	0.000320094
157285	SGK223	1.10295	8.18486	5.44722	1.47268e-05	0.000327994
2132	EXT2	-0.608002	10.3269	-5.44647	1.4754e-05	0.000328236
1894	ECT2	1.0066	8.27178	5.44406	1.48423e-05	0.000329835
320	APBA1	-0.740307	8.52592	-5.44046	1.49747e-05	0.000332047
920	CD4	0.676394	9.30697	5.43173	1.53011e-05	0.000338911
80381	CD276	0.7906	8.65223	5.43051	1.53473e-05	0.000339557
9052	GPRC5A	-1.29105	10.7428	-5.43007	1.5364e-05	0.000339557
5832	ALDH18A1	0.629806	9.20435	5.4228	1.56426e-05	0.000344959
5764	PTN	1.53178	9.56113	5.42197	1.56749e-05	0.000345292
157381	LINC00964	-2.05168	5.05068	-5.42102	1.57116e-05	0.000345724
23359	FAM189A1	1.6965	7.24942	5.42007	1.57486e-05	0.000346161
51203	NUSAP1	1.5365	7.81625	5.41671	1.58798e-05	0.000348284
6640	SNTA1	-0.753139	7.34369	-5.41585	1.59137e-05	0.000348649
3983	ABLIM1	0.689075	11.4979	5.41465	1.59611e-05	0.000348853
1164	CKS2	0.763264	10.1097	5.41373	1.59973e-05	0.000348853
81563	C1orf21	-1.17019	9.51161	-5.41361	1.60022e-05	0.000348853
2305	FOXM1	1.26195	6.45489	5.41342	1.60096e-05	0.000348853
911	CD1C	2.3105	6.98873	5.41205	1.60639e-05	0.000349658
727944	LOC727944	-2.13788	5.93044	-5.41031	1.61333e-05	0.00035079
55843	ARHGAP15	1.49724	8.65058	5.40373	1.6398e-05	0.000355389
8714	ABCC3	1.98189	8.29822	5.4033	1.64153e-05	0.000355389
54055	CYP4F29P	-1.20249	5.04123	-5.40119	1.65012e-05	0.000355998
79901	CYBRD1	1.07317	9.98251	5.40087	1.65141e-05	0.000355998
89932	PAPLN	0.91688	10.7885	5.39461	1.67721e-05	0.000361173
26086	GPSM1	-0.868349	9.15928	-5.38839	1.70321e-05	0.00036599
285	ANGPT2	1.52326	7.11637	5.38795	1.70508e-05	0.000366002
8751	ADAM15	0.831701	8.88455	5.37942	1.74144e-05	0.000372617
2123	EVI2A	1.34249	7.11602	5.37719	1.75107e-05	0.000374279
56938	ARNTL2	1.80676	5.93693	5.37648	1.75416e-05	0.000374544
11065	UBE2C	1.4865	6.27609	5.37578	1.75721e-05	0.000374798
912	CD1D	1.29188	6.37726	5.37023	1.78149e-05	0.000379573
26509	MYOF	0.753595	10.6375	5.36892	1.78728e-05	0.000380217
366	AQP9	-1.7023	5.88071	-5.3687	1.78828e-05	0.000380217
54756	IL17RD	-0.695113	10.6822	-5.36689	1.79628e-05	0.000381516
6355	CCL8	2.09949	8.44398	5.36592	1.80063e-05	0.000382037
4776	NFATC4	0.820745	7.03653	5.36236	1.81657e-05	0.000384168
3606	IL18	1.60813	7.74059	5.36145	1.82067e-05	0.000384168
49855	SCAPER	-0.640767	8.44648	-5.36117	1.82192e-05	0.000384168
79365	BHLHE41	1.634	8.50508	5.36113	1.82211e-05	0.000384168
3371	TNC	1.25235	9.70789	5.3595	1.82947e-05	0.000385316
54492	NEURL1B	1.44104	9.16617	5.35687	1.84143e-05	0.000387431
79648	MCPH1	-0.64247	7.66491	-5.35504	1.84979e-05	0.000388784
4356	MPP3	-1.26672	6.52083	-5.3536	1.85642e-05	0.00038977
51559	NT5DC3	1.64556	5.76225	5.34851	1.87996e-05	0.000394303
10226	PLIN3	0.637088	7.84411	5.34308	1.9054e-05	0.000399223
90362	FAM110B	1.28	9.06747	5.34014	1.91937e-05	0.000400958
100128511	NEBL-AS1	-1.26271	6.4396	-5.33975	1.92119e-05	0.000400958
1893	ECM1	1.50573	12.0647	5.33966	1.92164e-05	0.000400958
11182	SLC2A6	1.1812	7.34047	5.33863	1.92656e-05	0.000401569
5029	P2RY2	1.56913	5.30822	5.33646	1.93694e-05	0.000403315
85449	KIAA1755	1.45142	5.0892	5.33411	1.94823e-05	0.000405248
4175	MCM6	-0.653581	10.7703	-5.33228	1.95708e-05	0.000406572
10673	TNFSF13B	1.33633	7.78636	5.33187	1.95908e-05	0.000406572
92521	SPECC1	1.11032	7.92028	5.33114	1.96266e-05	0.000406572
147906	DACT3	1.24633	5.42747	5.32978	1.96925e-05	0.000407019
55799	CACNA2D3	1.496	6.51109	5.32956	1.97035e-05	0.000407019
84620	ST6GAL2	1.54065	3.88512	5.32938	1.97124e-05	0.000407019
8639	AOC3	1.72441	7.15659	5.32904	1.9729e-05	0.000407019
5172	SLC26A4	-1.89589	6.92594	-5.32634	1.98614e-05	0.000409333
79899	PRR5L	1.43639	5.80709	5.32513	1.9921e-05	0.00041014
100507421	TMEM178B	1.9087	7.98879	5.32434	1.99598e-05	0.000410233
10874	NMU	3.17237	6.07769	5.3238	1.99865e-05	0.000410233
284276	LINC00908	-0.776875	5.02905	-5.31992	2.01797e-05	0.000413211
117154	DACH2	-1.83708	8.31962	-5.31966	2.01931e-05	0.000413211
54014	BRWD1	-0.638019	8.99937	-5.31707	2.03229e-05	0.000415445
284439	SLC25A42	-0.870596	9.43106	-5.31488	2.04335e-05	0.000416967
84133	ZNRF3	-0.972912	9.97715	-5.31478	2.04387e-05	0.000416967
730	C7	0.863473	11.6847	5.31054	2.06546e-05	0.000420945
90993	CREB3L1	1.87438	6.70667	5.30902	2.0733e-05	0.000422115
23109	DDN	-1.40381	10.6227	-5.30691	2.08417e-05	0.0004239
54849	DEF8	0.599696	9.44946	5.30581	2.08984e-05	0.000424625
10287	RGS19	0.636812	7.3687	5.30516	2.09322e-05	0.000424884
51804	SIX4	0.94761	6.24174	5.29998	2.12029e-05	0.000429945
3717	JAK2	-0.669303	7.20203	-5.29887	2.12617e-05	0.000430704
100216479	FAR2P2	-1.0204	8.37376	-5.29841	2.12856e-05	0.000430755
118663	BTBD16	-1.43396	4.35266	-5.29364	2.15392e-05	0.00043545
64855	FAM129B	0.603792	8.99113	5.28976	2.17473e-05	0.000439217
4810	NHS	0.845549	10.0026	5.28162	2.21915e-05	0.000447293
100289187	GS1-259H13.2	-0.895028	7.18925	-5.2783	2.23748e-05	0.000450537
3897	L1CAM	1.8345	7.38748	5.2777	2.24083e-05	0.00045076
85446	ZFHX2	-0.980424	7.73416	-5.27577	2.25157e-05	0.00045247
441027	TMEM150C	-0.805282	11.7907	-5.27375	2.26291e-05	0.000453584
253982	ASPHD1	1.19123	6.57183	5.27358	2.26387e-05	0.000453584
54796	BNC2	1.34814	7.26208	5.27208	2.27229e-05	0.00045482
143187	VTI1A	-1.02256	10.7818	-5.2714	2.27613e-05	0.000455136
353355	ZNF233	-1.45991	7.55498	-5.26992	2.28454e-05	0.000456365
64651	CSRNP1	-1.04136	7.57497	-5.26899	2.28982e-05	0.000456514
7059	THBS3	0.611055	8.02772	5.26625	2.30544e-05	0.000458721
7373	COL14A1	2.15071	8.40235	5.25563	2.36704e-05	0.000467626
653	BMP5	2.07506	5.14239	5.25547	2.36799e-05	0.000467626
6330	SCN4B	1.9441	5.85915	5.25507	2.37037e-05	0.000467626
84978	FRMD5	1.80607	4.45896	5.25463	2.37294e-05	0.000467626
940	CD28	2.16391	5.63119	5.25428	2.37502e-05	0.000467626
1978	EIF4EBP1	0.592698	8.64271	5.25416	2.37571e-05	0.000467626
10261	IGSF6	1.61867	7.44326	5.25132	2.39251e-05	0.000469697
84898	PLXDC2	0.780415	9.79982	5.24961	2.40273e-05	0.000470274
130367	SGPP2	1.77801	6.47921	5.24867	2.40832e-05	0.000470389
9985	REC8	0.7832	8.13769	5.24608	2.42389e-05	0.000472953
9244	CRLF1	1.09717	5.119	5.24235	2.44645e-05	0.000476892
147138	TMC8	1.25548	6.84901	5.24125	2.45315e-05	0.000477736
338799	LINC01089	-0.84264	7.13143	-5.23935	2.46474e-05	0.000479281
100507165	LOC100507165	2.43594	6.37283	5.2391	2.46628e-05	0.000479281
3855	KRT7	2.04907	7.94436	5.23863	2.46918e-05	0.000479281
339105	PRSS53	-1.08084	5.93447	-5.23688	2.47993e-05	0.000479713
131034	CPNE4	-2.05221	6.56954	-5.23688	2.47996e-05	0.000479713
7164	TPD52L1	1.53226	9.47578	5.23541	2.48902e-05	0.000481004
29126	CD274	-1.09051	8.05947	-5.23184	2.51118e-05	0.000484357
11309	SLCO2B1	1.4907	8.16576	5.23046	2.51985e-05	0.000485122
10365	KLF2	-1.0343	10.4081	-5.23044	2.51996e-05	0.000485122
7482	WNT2B	2.41203	5.39666	5.22839	2.53281e-05	0.000486666
6723	SRM	0.620373	9.13653	5.22209	2.57279e-05	0.000492939
5493	PPL	1.47056	8.31825	5.21968	2.58824e-05	0.000494857
25825	BACE2	0.993798	9.4995	5.21852	2.59574e-05	0.000495451
2358	FPR2	-1.21586	4.01118	-5.21667	2.60768e-05	0.00049726
399959	MIR100HG	1.10377	9.39685	5.21411	2.62433e-05	0.000499019
259266	ASPM	1.61348	5.586	5.20964	2.65365e-05	0.000502742
1230	CCR1	1.41154	7.3791	5.20961	2.65389e-05	0.000502742
5164	PDK2	-0.662275	8.55534	-5.20183	2.70575e-05	0.000511627
671	BPI	-2.70844	5.88749	-5.19808	2.73106e-05	0.000515039
142678	MIB2	-0.58879	9.12565	-5.19801	2.73158e-05	0.000515039
5136	PDE1A	1.22803	10.4912	5.19444	2.75592e-05	0.000518658
1511	CTSG	2.53668	5.30601	5.19102	2.77946e-05	0.000521627
1183	CLCN4	-0.923492	9.03885	-5.18693	2.80789e-05	0.000525984
56062	KLHL4	1.90805	4.45457	5.18488	2.82224e-05	0.000528098
9610	RIN1	0.662148	7.4543	5.18228	2.84056e-05	0.000530625
395	ARHGAP6	1.01225	8.69338	5.18157	2.84563e-05	0.000531079
1378	CR1	-1.36041	10.919	-5.18116	2.84853e-05	0.000531128
3171	FOXA3	1.15162	4.23572	5.1783	2.86885e-05	0.000534422
22996	TTC39A	1.2972	7.3501	5.17614	2.88431e-05	0.000536807
4889	NPY5R	1.32996	6.53705	5.16791	2.94405e-05	0.000546914
84034	EMILIN2	0.757669	8.92681	5.16742	2.94762e-05	0.000547074
5276	SERPINI2	-2.07921	4.40215	-5.16655	2.95404e-05	0.000547761
151194	METTL21A	-0.660646	8.70778	-5.16484	2.96661e-05	0.000548367
4794	NFKBIE	0.755102	8.85279	5.16468	2.96778e-05	0.000548367
100130522	PARD6G-AS1	-1.1424	5.15934	-5.16467	2.96787e-05	0.000548367
891	CCNB1	1.05524	7.62661	5.16463	2.96819e-05	0.000548367
9404	LPXN	0.608551	8.20433	5.16403	2.97261e-05	0.00054868
9837	GINS1	1.42428	7.27896	5.15975	3.00442e-05	0.000553539
54440	SASH3	1.11784	8.62467	5.15548	3.0366e-05	0.000558956
84456	L3MBTL3	-1.37495	7.92967	-5.15395	3.04818e-05	0.000560575
7301	TYRO3	-1.30948	9.70988	-5.15264	3.05815e-05	0.000561897
3097	HIVEP2	-0.648376	10.0672	-5.1507	3.07295e-05	0.000564103
10435	CDC42EP2	-0.806745	8.95334	-5.15016	3.07708e-05	0.000564347
344405	PRORSD1P	-0.992837	6.49773	-5.14887	3.08693e-05	0.000565125
4629	MYH11	1.10677	9.64866	5.14614	3.10801e-05	0.000568467
23231	SEL1L3	1.20063	8.68187	5.14405	3.12428e-05	0.000570925
23612	PHLDA3	0.8103	7.89867	5.14033	3.15334e-05	0.000575713
1033	CDKN3	1.5385	6.67589	5.13898	3.16396e-05	0.00057713
8676	STX11	-0.983466	7.30913	-5.13824	3.16982e-05	0.000577676
9229	DLGAP1	2.09141	6.21729	5.13636	3.18468e-05	0.000579859
90293	KLHL13	1.52766	8.52388	5.13143	3.22408e-05	0.000584919
57689	LRRC4C	1.71155	5.41405	5.13016	3.2343e-05	0.000585973
54897	CASZ1	-1.03406	9.06233	-5.12998	3.2357e-05	0.000585973
6586	SLIT3	0.921092	9.40872	5.12901	3.24356e-05	0.000586869
10272	FSTL3	1.66003	7.76629	5.12384	3.28559e-05	0.000592918
3798	KIF5A	1.69223	5.62674	5.12381	3.28582e-05	0.000592918
56603	CYP26B1	-2.37369	7.83179	-5.12304	3.29214e-05	0.000593058
129807	NEU4	-0.639259	4.85	-5.123	3.29248e-05	0.000593058
4281	MID1	0.699623	9.59584	5.12008	3.31655e-05	0.000596861
4884	NPTX1	-0.943417	3.80503	-5.1178	3.33546e-05	0.00059925
201176	ARHGAP27	0.653286	8.44006	5.11718	3.34058e-05	0.00059958
79625	NDNF	-0.913879	11.8768	-5.11532	3.35611e-05	0.000601295
164684	WBP2NL	-1.45143	5.46174	-5.10651	3.43065e-05	0.000612473
10100	TSPAN2	-0.69194	11.1181	-5.10569	3.43765e-05	0.000612899
81624	DIAPH3	1.33627	7.36516	5.10552	3.43912e-05	0.000612899
4815	NINJ2	1.39953	6.58052	5.10454	3.44751e-05	0.000613852
7100	TLR5	1.2944	6.43274	5.10133	3.47526e-05	0.000617701
80345	ZSCAN16	0.788943	8.29848	5.09942	3.49184e-05	0.000620101
51196	PLCE1	-0.964449	11.6475	-5.09756	3.50807e-05	0.000622435
3059	HCLS1	0.83382	9.44714	5.09718	3.51135e-05	0.000622469
7076	TIMP1	0.639339	12.1295	5.09628	3.51924e-05	0.00062332
10243	GPHN	-0.759366	9.71333	-5.09469	3.53321e-05	0.000625137
80231	CXorf21	0.869798	5.79807	5.09441	3.5357e-05	0.000625137
3779	KCNMB1	1.56631	6.77447	5.09392	3.54008e-05	0.000625362
23327	NEDD4L	-0.620282	10.2971	-5.0925	3.55264e-05	0.000626483
22918	CD93	0.681258	11.3989	5.09177	3.55904e-05	0.000626721
55247	NEIL3	2.06988	3.85377	5.09164	3.56021e-05	0.000626721
10157	AASS	-0.620106	7.85397	-5.09126	3.56356e-05	0.000626763
256815	C10orf67	-1.14546	6.05154	-5.09064	3.56915e-05	0.000627052
100288730	PAN3-AS1	-0.988771	8.81928	-5.09038	3.57142e-05	0.000627052
1999	ELF3	1.61051	8.55659	5.08496	3.62003e-05	0.000634481
834	CASP1	0.63665	9.45663	5.0837	3.63142e-05	0.000635924
8455	ATRN	-0.602681	9.51444	-5.08232	3.64393e-05	0.000637518
55872	PBK	1.95212	5.21339	5.082	3.64685e-05	0.000637518
9513	FXR2	-0.617062	9.4107	-5.08132	3.65305e-05	0.00063805
7008	TEF	-0.787885	10.2889	-5.07701	3.69258e-05	0.000643912
27330	RPS6KA6	-1.2005	7.35729	-5.07667	3.69571e-05	0.000643912
51207	DUSP13	-0.977312	4.31888	-5.07661	3.6962e-05	0.000643912
11082	ESM1	-1.38509	8.27714	-5.07145	3.74411e-05	0.000651695
931	MS4A1	2.62058	5.8304	5.07043	3.75363e-05	0.000652514
699	BUB1	1.29712	4.32688	5.06986	3.75901e-05	0.000652514
503693	LOH12CR2	-0.921033	6.54966	-5.06974	3.76016e-05	0.000652514
306	ANXA3	1.53598	9.2865	5.06957	3.76176e-05	0.000652514
7473	WNT3	-1.54067	8.6308	-5.06846	3.7722e-05	0.000653761
899	CCNF	0.968061	6.97865	5.06765	3.77979e-05	0.000654515
200373	CFAP221	1.08387	7.25391	5.06543	3.80078e-05	0.000657584
53827	FXYD5	0.90359	9.23469	5.06351	3.81907e-05	0.000660182
2841	GPR18	1.45716	5.87448	5.05694	3.88213e-05	0.000669934
4747	NEFL	2.86585	7.61317	5.05554	3.89577e-05	0.000671713
3357	HTR2B	1.19249	8.54482	5.05311	3.91942e-05	0.000674794
5050	PAFAH1B3	0.754194	8.21795	5.05302	3.92034e-05	0.000674794
3984	LIMK1	0.619217	9.97603	5.05111	3.93912e-05	0.00067687
23397	NCAPH	1.11603	3.33468	5.04994	3.95063e-05	0.00067827
100507027	LINC00948	-3.40713	5.75987	-5.04755	3.97427e-05	0.000681678
1001	CDH3	1.53265	6.49576	5.04725	3.97725e-05	0.000681678
6799	SULT1A2	-0.776282	10.4333	-5.0459	3.99068e-05	0.0006834
26040	SETBP1	0.8837	9.50819	5.04532	3.99638e-05	0.000683795
132671	SPATA18	-0.890703	9.23284	-5.04065	4.04326e-05	0.000690643
23551	RASD2	1.18745	6.12891	5.0356	4.09458e-05	0.00069697
114899	C1QTNF3	0.99914	9.47603	5.0354	4.09664e-05	0.00069697
599	BCL2L2	-0.65116	10.2666	-5.03132	4.13859e-05	0.000703189
9447	AIM2	1.49416	4.87995	5.03107	4.14112e-05	0.000703189
152195	NUDT16P1	-0.827863	6.85646	-5.02988	4.15351e-05	0.000704493
400793	C1orf226	-1.00757	8.4508	-5.02879	4.16484e-05	0.000705433
55816	DOK5	1.6595	8.4798	5.0277	4.1762e-05	0.000706275
80311	KLHL15	-0.670606	8.44294	-5.02764	4.17682e-05	0.000706275
28968	SLC6A16	-0.784835	7.20878	-5.02562	4.19793e-05	0.00070925
55603	FAM46A	0.810158	8.9194	5.02497	4.20474e-05	0.000709346
166929	SGMS2	0.934717	8.42569	5.02489	4.20554e-05	0.000709346
101926978	LINC01111	2.79531	4.55562	5.02097	4.247e-05	0.00071543
25816	TNFAIP8	1.00875	9.29556	5.02047	4.25226e-05	0.00071543
4311	MME	-0.60043	12.4102	-5.01976	4.25978e-05	0.000716098
84913	ATOH8	-1.13529	9.13779	-5.01582	4.30197e-05	0.000721986
100506603	LOC100506603	0.679808	8.10751	5.01475	4.31342e-05	0.000723305
2814	GP5	-0.891031	4.6264	-5.01125	4.35133e-05	0.000728451
53354	PANK1	-0.917685	9.80412	-5.01049	4.35957e-05	0.000729224
56944	OLFML3	1.57883	9.07197	5.00823	4.38434e-05	0.000732759
645566	FLJ45482	1.12303	5.62464	5.00767	4.39043e-05	0.000733082
118788	PIK3AP1	0.828539	10.1872	5.00714	4.39619e-05	0.000733082
5888	RAD51	1.33552	5.95261	5.00422	4.42845e-05	0.000737685
79651	RHBDF2	0.717019	7.45631	5.0038	4.43304e-05	0.00073784
101928200	MRGPRF-AS1	-0.9673	5.1128	-4.99913	4.4851e-05	0.000745317
1117	CHI3L2	1.71003	4.01834	4.99727	4.506e-05	0.000747514
64094	SMOC2	2.49269	7.10236	4.99452	4.53703e-05	0.000751964
10817	FRS3	-0.868665	5.76751	-4.99424	4.54029e-05	0.000751964
83860	TAF3	-0.609096	9.56783	-4.99335	4.55039e-05	0.000753019
51066	SSUH2	2.09889	7.0221	4.99143	4.57225e-05	0.000756016
9235	IL32	1.16384	11.111	4.9907	4.58055e-05	0.000756734
11341	SCRG1	1.93376	4.54754	4.99039	4.5841e-05	0.000756734
642976	GRIK1-AS1	-1.11307	4.35107	-4.98541	4.64162e-05	0.000764976
4059	BCAM	-0.601404	11.3388	-4.97894	4.71728e-05	0.000776175
7157	TP53	0.616002	9.9026	4.97697	4.74052e-05	0.000779362
70	ACTC1	1.61417	5.68787	4.9754	4.75913e-05	0.000781785
643783	USP46-AS1	-0.781782	6.71225	-4.97054	4.81735e-05	0.000790704
116154	PHACTR3	-1.56183	8.82938	-4.97006	4.82316e-05	0.000791014
92591	ASB16	-0.732973	4.73291	-4.96865	4.84015e-05	0.000792473
220388	CCDC89	-1.02499	6.64518	-4.96848	4.84224e-05	0.000792473
27197	GPR82	2.03408	3.93423	4.96835	4.84385e-05	0.000792473
5244	ABCB4	1.74104	5.79189	4.9642	4.89436e-05	0.000796213
6943	TCF21	-1.07776	11.8398	-4.96369	4.90061e-05	0.000796587
1441	CSF3R	-1.01388	6.15506	-4.96307	4.90813e-05	0.000797166
653464	SRGAP2C	-1.02365	10.5413	-4.95895	4.95899e-05	0.00080413
79822	ARHGAP28	-0.831463	10.9759	-4.95758	4.97603e-05	0.000806245
7462	LAT2	1.10676	6.13767	4.95672	4.98667e-05	0.000807319
4635	MYL4	-0.900177	7.21809	-4.95593	4.99657e-05	0.000808273
374860	ANKRD30B	-2.12576	4.88212	-4.94925	5.08074e-05	0.000819501
84417	C2orf40	1.10841	10.6319	4.94913	5.08224e-05	0.000819501
3575	IL7R	1.44714	7.73332	4.94448	5.14168e-05	0.000828423
56776	FMN2	-1.37719	10.0598	-4.94088	5.18829e-05	0.000834598
1363	CPE	1.37804	8.56643	4.94018	5.19741e-05	0.000835398
79007	DBNDD1	0.813351	6.69508	4.93917	5.21052e-05	0.000836173
53616	ADAM22	1.18035	7.33147	4.93509	5.26388e-05	0.000844064
79875	THSD4	0.875793	9.99295	4.93352	5.28472e-05	0.000846731
28231	SLCO4A1	1.51842	6.75262	4.93208	5.30377e-05	0.000849109
6376	CX3CL1	-0.738986	10.2948	-4.9316	5.3101e-05	0.000849448
79019	CENPM	1.04228	5.21693	4.93062	5.32321e-05	0.000850869
1029	CDKN2A	2.00298	6.12772	4.92544	5.3926e-05	0.000859915
7040	TGFB1	0.708285	7.67409	4.92354	5.41827e-05	0.000863325
154	ADRB2	1.36011	6.49652	4.92246	5.433e-05	0.000864988
55273	TMEM100	2.07753	5.40536	4.92156	5.44519e-05	0.000865907
121457	IKBIP	0.759287	8.6739	4.92096	5.45343e-05	0.000866188
23157	SEPT6	0.923986	7.59583	4.91961	5.47186e-05	0.000868432
51050	PI15	2.52914	4.87596	4.91894	5.48099e-05	0.000869195
27143	PALD1	1.1168	9.02773	4.91576	5.52483e-05	0.000874772
11245	GPR176	1.12876	9.13617	4.91488	5.53701e-05	0.000876012
112885	PHF21B	-1.17105	8.03249	-4.91389	5.55066e-05	0.000877483
23682	RAB38	1.11887	7.35886	4.90636	5.65635e-05	0.00089217
9435	CHST2	1.19459	9.98616	4.9057	5.66563e-05	0.000892858
9055	PRC1	1.03224	6.89892	4.90296	5.70472e-05	0.000898314
85450	ITPRIP	-0.737726	9.32693	-4.90135	5.72773e-05	0.000901235
57611	ISLR2	0.837911	4.44073	4.90054	5.73929e-05	0.000902349
145978	LINC00052	-2.7187	4.66354	-4.89959	5.75301e-05	0.000903801
153443	SRFBP1	-0.834245	7.5219	-4.89678	5.79366e-05	0.000909455
57823	SLAMF7	1.83333	8.16276	4.89524	5.81592e-05	0.000911552
2321	FLT1	-0.69409	11.3524	-4.89319	5.84587e-05	0.000914418
212	ALAS2	-1.49201	4.46251	-4.89306	5.84781e-05	0.000914418
1464	CSPG4	1.00651	8.03252	4.89219	5.86051e-05	0.000915693
387103	CENPW	1.39938	7.39255	4.89173	5.86731e-05	0.000916046
65975	STK33	-0.710299	7.97117	-4.89058	5.88417e-05	0.000917413
23541	SEC14L2	1.11993	6.37811	4.88677	5.94058e-05	0.00092462
389337	ARHGEF37	-0.918477	10.8723	-4.88626	5.94823e-05	0.000925097
9415	FADS2	0.798914	6.48931	4.88077	6.03047e-05	0.000934282
1300	COL10A1	2.64933	5.70526	4.87946	6.05033e-05	0.000935921
1628	DBP	-0.797676	7.477	-4.87738	6.08198e-05	0.000939374
646762	LOC646762	-0.75985	8.63577	-4.87705	6.08695e-05	0.000939423
26577	PCOLCE2	-0.89466	11.8762	-4.87525	6.11444e-05	0.000942159
50486	G0S2	-1.06237	10.3871	-4.8695	6.2032e-05	0.000954441
57643	ZSWIM5	-0.586805	7.406	-4.86884	6.2134e-05	0.00095528
3161	HMMR	1.45469	6.30115	4.86823	6.22294e-05	0.000956018
7089	TLE2	0.764604	9.70759	4.8664	6.25147e-05	0.00095821
23086	EXPH5	-1.06158	10.3647	-4.86604	6.25719e-05	0.000958358
79801	SHCBP1	1.51297	4.12464	4.86557	6.26451e-05	0.00095875
27295	PDLIM3	0.90039	7.66267	4.86501	6.27328e-05	0.000959364
644150	WIPF3	-1.19335	10.8874	-4.86435	6.28361e-05	0.000960215
2118	ETV4	1.2058	5.66023	4.86246	6.31355e-05	0.00096406
64423	INF2	-0.771805	7.23939	-4.86084	6.33919e-05	0.000966462
2304	FOXE1	2.32267	5.3374	4.86051	6.34448e-05	0.000966462
29078	NDUFAF4	-0.612825	9.66216	-4.85908	6.36719e-05	0.000968582
8767	RIPK2	0.664695	8.83717	4.85048	6.50585e-05	0.000986696
151354	FAM84A	1.53775	6.55173	4.84941	6.52325e-05	0.000988591
64092	SAMSN1	1.63805	6.99422	4.84424	6.60841e-05	0.000999994
4751	NEK2	1.18152	3.64984	4.84237	6.63932e-05	0.00100392
9121	SLC16A5	0.81081	8.69704	4.84061	6.66874e-05	0.00100558
260425	MAGI3	-0.795204	7.85609	-4.8404	6.67226e-05	0.00100558
8787	RGS9	-0.790631	8.55499	-4.84022	6.67524e-05	0.00100558
144717	FAM109A	0.598118	7.9516	4.83915	6.69314e-05	0.00100752
695	BTK	1.44394	6.70537	4.83704	6.72855e-05	0.00101209
2769	GNA15	1.26611	5.69042	4.83441	6.77314e-05	0.00101804
5348	FXYD1	-0.711784	9.57168	-4.8329	6.79877e-05	0.00102113
57402	S100A14	1.33035	5.48032	4.83066	6.83702e-05	0.00102487
93082	NEURL3	1.19016	6.40528	4.83055	6.83889e-05	0.00102487
80313	LRRC27	-0.649849	7.97334	-4.82974	6.85285e-05	0.0010262
11099	PTPN21	-0.703983	10.7155	-4.82925	6.86122e-05	0.00102669
23547	LILRA4	1.15738	5.01268	4.82413	6.94981e-05	0.00103917
147841	SPC24	1.08871	4.68278	4.82165	6.99326e-05	0.0010435
11037	STON1	-0.768604	9.33749	-4.82159	6.99429e-05	0.0010435
29781	NCAPH2	0.806972	9.04328	4.82036	7.0159e-05	0.00104484
84251	SGIP1	-0.717565	7.17444	-4.81988	7.0242e-05	0.00104487
22873	DZIP1	0.820502	9.34936	4.81816	7.05465e-05	0.00104863
55355	HJURP	1.26902	4.87559	4.81322	7.14256e-05	0.00106013
4868	NPHS1	-1.3776	11.358	-4.8111	7.18049e-05	0.00106419
25890	ABI3BP	1.2365	9.31909	4.81024	7.19605e-05	0.00106571
7153	TOP2A	2.0559	6.77677	4.80878	7.22239e-05	0.00106883
128553	TSHZ2	1.09062	8.7613	4.80763	7.24326e-05	0.00106972
283927	NUDT7	-0.635392	8.78175	-4.80754	7.24488e-05	0.00106972
64429	ZDHHC6	-0.62528	11.5179	-4.80533	7.28524e-05	0.0010732
783	CACNB2	-1.20005	9.54888	-4.80511	7.28919e-05	0.0010732
101928153	ITGA9-AS1	-1.08139	5.6257	-4.80347	7.31925e-05	0.00107443
115749	C12orf56	-1.27408	8.03136	-4.80345	7.31966e-05	0.00107443
114818	KLHL29	-0.720868	10.0784	-4.80213	7.34377e-05	0.00107636
79711	IPO4	0.740019	8.36606	4.8019	7.34807e-05	0.00107636
53820	RIPPLY3	-0.85143	4.63749	-4.80099	7.3649e-05	0.00107805
100507557	LOC100507557	-0.945449	7.12612	-4.80007	7.38195e-05	0.00107976
284021	MILR1	1.24335	4.97772	4.79806	7.41913e-05	0.00108441
283861	LOC283861	-0.75752	9.14573	-4.79754	7.42887e-05	0.00108505
5193	PEX12	-0.620535	8.09864	-4.79597	7.45808e-05	0.00108793
50856	CLEC4A	0.932456	7.13319	4.7946	7.48383e-05	0.0010907
127833	SYT2	-1.22615	4.50065	-4.79256	7.52211e-05	0.0010947
2177	FANCD2	1.09292	7.06375	4.78895	7.59051e-05	0.00110385
2212	FCGR2A	0.947563	10.2457	4.78843	7.60047e-05	0.00110451
2735	GLI1	1.36389	5.7619	4.7863	7.64109e-05	0.00110961
4681	NBL1	1.29431	9.88279	4.78478	7.67027e-05	0.00111304
26468	LHX6	1.4952	5.16617	4.78299	7.70473e-05	0.00111724
222643	UNC5CL	1.37386	9.51421	4.78144	7.73485e-05	0.0011208
730091	LINC00886	-1.16403	7.53215	-4.77508	7.85916e-05	0.00113558
80131	LRRC8E	1.46519	5.68985	4.77507	7.8594e-05	0.00113558
64285	RHBDF1	0.587799	7.77966	4.77357	7.88903e-05	0.00113905
84940	CORO6	0.737551	4.04056	4.77263	7.90767e-05	0.00114011
55824	PAG1	0.797812	9.42435	4.77095	7.94095e-05	0.00114327
1152	CKB	-0.63912	10.1881	-4.76872	7.98544e-05	0.00114739
284080	LOC284080	-1.3819	6.49579	-4.76765	8.00697e-05	0.00114867
3856	KRT8	1.34301	8.92973	4.76674	8.02535e-05	0.00115013
81493	SYNC	1.46012	7.89223	4.76658	8.02856e-05	0.00115013
84059	GPR98	-1.71679	7.14664	-4.76289	8.10314e-05	0.00115953
129446	XIRP2	-0.987177	3.42293	-4.76269	8.10711e-05	0.00115953
84689	MS4A14	1.12215	5.16101	4.76248	8.11144e-05	0.00115953
3684	ITGAM	1.31223	7.46082	4.76144	8.13264e-05	0.00116174
55026	TMEM255A	2.44655	4.28582	4.76092	8.14327e-05	0.00116194
728024	LOC728024	-0.619048	7.56994	-4.76081	8.14554e-05	0.00116194
23533	PIK3R5	1.24951	6.54207	4.75982	8.16577e-05	0.001164
56159	TEX11	-2.01764	5.41161	-4.75814	8.20024e-05	0.00116743
158376	LINC00961	-0.966671	8.82565	-4.75808	8.20143e-05	0.00116743
145741	C2CD4A	2.14008	4.11866	4.7565	8.23409e-05	0.00117043
115361	GBP4	-0.794301	10.0365	-4.75558	8.25305e-05	0.00117147
139065	SLITRK4	1.90015	7.92904	4.75377	8.2907e-05	0.00117598
10148	EBI3	1.18107	6.59389	4.74875	8.39576e-05	0.00118999
2023	ENO1	0.610539	11.1821	4.74849	8.40122e-05	0.00118999
54972	TMEM132A	0.809631	6.99708	4.74401	8.49618e-05	0.00120259
2047	EPHB1	1.64062	5.40911	4.74297	8.51826e-05	0.00120487
90139	TSPAN18	0.651009	9.37855	4.74261	8.52593e-05	0.00120511
387758	FIBIN	0.790443	10.5924	4.73993	8.58342e-05	0.00121186
112399	EGLN3	0.947565	6.29883	4.73983	8.58571e-05	0.00121186
9658	ZNF516	-0.626068	8.95928	-4.73654	8.65675e-05	0.00122018
57405	SPC25	1.68603	3.94015	4.72946	8.81204e-05	0.00123947
84658	EMR3	-0.845785	4.21191	-4.7231	8.95368e-05	0.00125746
6530	SLC6A2	-1.6696	5.57607	-4.72271	8.96256e-05	0.00125746
4504	MT3	-0.696925	5.03212	-4.7226	8.96495e-05	0.00125746
125875	CLDND2	-0.832156	6.05023	-4.72138	8.99244e-05	0.00125957
27346	TMEM97	0.934114	9.7705	4.72008	9.02177e-05	0.00126192
84249	PSD2	-1.14418	3.67125	-4.71912	9.04363e-05	0.0012641
9242	MSC	1.33844	5.87887	4.71878	9.05125e-05	0.00126429
54674	LRRN3	1.76013	5.96765	4.71824	9.0636e-05	0.00126514
4524	MTHFR	0.610478	7.91962	4.71533	9.12998e-05	0.00127264
100506658	OCLN	0.872407	9.3918	4.71273	9.18973e-05	0.00128008
9508	ADAMTS3	2.09756	7.42054	4.71222	9.2016e-05	0.00128085
7074	TIAM1	-1.03435	9.73827	-4.70807	9.29792e-05	0.00129158
2903	GRIN2A	1.99208	5.39005	4.70505	9.36843e-05	0.00129869
5738	PTGFRN	0.97782	9.31939	4.70452	9.38112e-05	0.00129879
221935	SDK1	1.4466	6.99917	4.70448	9.38202e-05	0.00129879
401115	C4orf48	0.740259	7.76809	4.70302	9.41634e-05	0.00130265
84617	TUBB6	0.596162	10.6469	4.70065	9.47264e-05	0.00130954
145773	FAM81A	-1.39249	9.0783	-4.70003	9.48736e-05	0.00131067
22795	NID2	0.903551	10.1069	4.69859	9.52172e-05	0.00131452
27289	RND1	-0.908844	6.89916	-4.69761	9.54507e-05	0.00131594
200830	LOC200830	-1.09905	4.75191	-4.69651	9.5715e-05	0.00131868
64850	ETNPPL	-2.92107	4.98844	-4.69549	9.59609e-05	0.00132117
4803	NGF	-1.04591	6.98557	-4.69467	9.61582e-05	0.00132298
10518	CIB2	0.877643	7.27836	4.69432	9.62416e-05	0.00132322
378832	COL18A1-AS1	-1.17109	5.53571	-4.69063	9.71367e-05	0.0013319
100506190	LINC00963	0.7941	7.48965	4.68925	9.74741e-05	0.00133471
146909	KIF18B	1.90264	5.39894	4.68887	9.75691e-05	0.0013351
11174	ADAMTS6	1.23707	6.73615	4.68149	9.93927e-05	0.00135729
5996	RGS1	-1.47473	6.17097	-4.68009	9.9743e-05	0.00136087
286204	CRB2	-1.44032	8.53495	-4.6799	9.97896e-05	0.00136087
126129	CPT1C	0.930643	7.2775	4.6791	9.99909e-05	0.00136269
1470	CST2	1.2215	4.80574	4.67335	0.000101442	0.0013806
23060	ZNF609	-0.881376	8.15569	-4.67291	0.000101555	0.00138121
100507537	LOC100507537	-1.76712	4.351	-4.67123	0.000101986	0.00138433
158572	USP27X-AS1	-0.68722	5.55932	-4.67121	0.000101991	0.00138433
54947	LPCAT2	-0.877391	9.22218	-4.67036	0.000102208	0.00138634
84894	LINGO1	-0.93842	7.75045	-4.6679	0.00010284	0.00139304
57619	SHROOM3	-0.620659	10.0095	-4.66283	0.000104159	0.00140901
57876	MUC3B	1.04169	4.73475	4.65973	0.000104972	0.00141715
146336	SSTR5-AS1	1.99812	4.46153	4.65884	0.000105206	0.00141937
83876	MRO	-1.73005	9.23255	-4.65478	0.000106284	0.00143104
54206	ERRFI1	-0.713116	10.4267	-4.6541	0.000106467	0.00143254
339896	GADL1	-0.830747	3.20049	-4.64886	0.000107876	0.00145053
81691	LOC81691	0.995001	5.76856	4.64238	0.000109645	0.00147236
347733	TUBB2B	1.13417	8.29779	4.64008	0.000110281	0.00147991
2242	FES	0.621878	7.94635	4.63964	0.000110403	0.00148056
3017	HIST1H2BD	-0.933314	9.24111	-4.63628	0.000111338	0.00149112
24141	LAMP5	2.12432	9.00887	4.635	0.000111695	0.00149491
2237	FEN1	0.588109	8.78329	4.63294	0.000112275	0.00149969
7849	PAX8	0.636451	10.1912	4.63294	0.000112276	0.00149969
152189	CMTM8	-0.85243	8.89441	-4.63189	0.000112572	0.00150066
29763	PACSIN3	-0.633397	7.43469	-4.62544	0.000114409	0.00152313
79191	IRX3	1.39335	8.92128	4.62371	0.000114907	0.00152775
101928513	CATIP-AS1	-1.48436	5.7237	-4.62341	0.000114994	0.00152789
641	BLM	0.800933	5.46051	4.62205	0.000115387	0.00153091
91316	GUSBP11	0.988197	10.5972	4.62185	0.000115447	0.00153091
64859	NABP1	0.703969	8.81872	4.61942	0.000116152	0.00153869
56301	SLC7A10	-1.21808	4.47129	-4.6193	0.000116188	0.00153869
9735	KNTC1	0.690989	6.29012	4.61889	0.000116309	0.00153928
6261	RYR1	0.988115	4.23022	4.61656	0.000116991	0.00154729
4671	NAIP	1.04679	7.883	4.61621	0.000117092	0.00154761
387882	C12orf75	1.09245	8.78192	4.61356	0.000117873	0.00155692
84152	PPP1R1B	2.22371	6.67067	4.61321	0.000117979	0.0015573
51751	HIGD1B	1.58731	4.59464	4.61043	0.000118806	0.00156712
5997	RGS2	-0.727692	10.8185	-4.61018	0.000118879	0.00156712
10112	KIF20A	1.49998	4.42347	4.60136	0.000121543	0.00160014
29121	CLEC2D	0.838174	5.1147	4.59552	0.000123336	0.00161952
151887	CCDC80	1.28278	9.68549	4.59447	0.000123664	0.00162277
7275	TUB	-0.758018	9.36826	-4.59409	0.000123781	0.00162324
2294	FOXF1	-1.21546	8.15036	-4.59284	0.000124172	0.0016267
114036	LINC00310	1.28455	3.97815	4.59273	0.000124205	0.0016267
9829	DNAJC6	-0.689666	9.29098	-4.59009	0.00012503	0.00163643
313	AOAH	1.0416	7.19058	4.5881	0.000125657	0.00164184
9068	ANGPTL1	-1.01916	7.14992	-4.58805	0.000125673	0.00164184
5026	P2RX5	1.67673	5.52727	4.58801	0.000125687	0.00164184
401282	DKFZp451B082	-0.725533	2.97021	-4.5877	0.000125784	0.00164203
56941	HMCES	-0.64344	10.3861	-4.58648	0.000126171	0.00164603
57650	KIAA1524	0.885629	5.22645	4.5844	0.00012683	0.00165035
91947	ARRDC4	-0.774966	11.3714	-4.58383	0.000127013	0.00165166
92154	MTSS1L	-0.819048	8.72547	-4.58222	0.000127526	0.00165726
56971	CEACAM19	-0.980954	7.59907	-4.58156	0.00012774	0.00165897
6999	TDO2	3.39725	5.24906	4.58119	0.000127856	0.00165941
10631	POSTN	0.617345	12.0739	4.57996	0.000128253	0.00166242
23627	PRND	1.85659	4.97525	4.57922	0.000128493	0.00166447
9627	SNCAIP	1.24801	8.23925	4.57663	0.00012933	0.00167101
7216	TRO	0.921776	7.75344	4.57211	0.000130806	0.00168792
56963	RGMA	-1.03746	6.57931	-4.56985	0.000131551	0.00169645
254427	PROSER2	0.623864	6.57918	4.56839	0.000132033	0.00170158
64127	NOD2	1.25446	5.93817	4.56777	0.000132241	0.00170311
534	ATP6V1G2	-1.43187	6.21985	-4.56551	0.000132994	0.00171028
5745	PTH1R	-0.680137	11.8415	-4.56535	0.000133048	0.00171028
6581	SLC22A3	1.01764	6.85792	4.56421	0.00013343	0.00171347
283383	GPR133	-1.70285	6.5422	-4.5641	0.000133466	0.00171347
8857	FCGBP	1.44454	7.45707	4.56276	0.000133916	0.00171815
83694	RPS6KL1	1.08412	5.92906	4.56226	0.000134083	0.0017192
914	CD2	1.56835	6.34856	4.56083	0.000134566	0.0017232
55809	TRERF1	0.719381	7.35145	4.55889	0.000135223	0.00173052
3159	HMGA1	1.12424	8.79747	4.55391	0.000136926	0.00174567
151195	CCNYL1	0.59825	9.53408	4.55366	0.000137011	0.00174567
7644	ZNF91	-0.729732	9.03749	-4.55353	0.000137056	0.00174567
677779	LINC00488	1.24145	3.4514	4.5534	0.000137101	0.00174567
57103	C12orf5	0.764533	8.46117	4.55219	0.000137519	0.0017499
345557	PLCXD3	0.853555	9.44443	4.55123	0.00013785	0.001753
29760	BLNK	1.36249	8.66441	4.55025	0.000138189	0.0017551
230	ALDOC	-0.697177	8.16936	-4.54287	0.000140775	0.0017862
64067	NPAS3	-1.1063	9.03645	-4.54136	0.00014131	0.00179022
84448	ABLIM2	-0.861596	10.6936	-4.53679	0.000142941	0.00180861
25925	ZNF521	-0.68181	9.88312	-4.53607	0.000143202	0.00181077
3995	FADS3	0.607235	9.43716	4.53578	0.000143304	0.00181094
26191	PTPN22	1.19237	4.59319	4.53487	0.000143632	0.00181249
22941	SHANK2	-0.85923	7.95105	-4.53304	0.000144293	0.00181774
9103	FCGR2C	1.14525	7.35111	4.53198	0.000144679	0.00182032
100130992	LOC100130992	-0.780301	2.70675	-4.53159	0.000144822	0.00182098
3816	KLK1	-2.65265	6.52248	-4.53052	0.00014521	0.00182472
10350	ABCA9	1.54552	5.32684	4.5302	0.00014533	0.00182509
5294	PIK3CG	1.26306	6.62061	4.52982	0.000145465	0.00182565
55314	TMEM144	0.881223	7.44333	4.52702	0.000146492	0.00183512
949	SCARB1	0.819849	6.42182	4.52549	0.000147056	0.00184019
84063	KIRREL2	-1.2294	7.71677	-4.52382	0.000147677	0.00184652
114548	NLRP3	0.972266	6.38216	4.52093	0.00014875	0.00185878
1675	CFD	1.29536	6.68322	4.51905	0.000149455	0.00186642
29947	DNMT3L	-2.11619	5.85364	-4.51854	0.000149647	0.00186766
8349	HIST2H2BE	-0.63587	9.51432	-4.51548	0.000150803	0.00187979
91607	SLFN11	0.79507	9.24297	4.51523	0.000150898	0.00187979
100	ADA	0.969811	6.91869	4.51494	0.000151007	0.00187998
1734	DIO2	1.9959	6.21482	4.51121	0.00015243	0.00189536
94103	ORMDL3	-1.03223	9.73915	-4.51065	0.000152646	0.00189687
27094	KCNMB3	-0.670385	5.88147	-4.50981	0.000152966	0.00189968
220202	ATOH7	-1.47297	4.17297	-4.5089	0.000153316	0.00190131
259173	ALS2CL	-1.04057	11.0057	-4.50874	0.000153379	0.00190131
4091	SMAD6	-0.813383	10.4231	-4.50873	0.000153381	0.00190131
220323	OAF	0.907079	8.57166	4.50649	0.000154248	0.0019109
3037	HAS2	1.10226	4.10677	4.50385	0.000155274	0.00192124
3225	HOXC9	0.638999	8.83012	4.5028	0.000155683	0.00192513
1788	DNMT3A	0.607056	9.0395	4.501	0.000156391	0.00193206
94274	PPP1R14A	0.81283	9.19843	4.50047	0.0001566	0.00193206
4515	MTCP1	0.827533	4.2981	4.48815	0.000161519	0.00198753
100132891	LOC100132891	1.59547	7.3448	4.48473	0.000162912	0.00200101
158314	LINC00475	0.728705	6.23181	4.4815	0.000164242	0.0020142
79973	ZNF442	-0.68541	7.84264	-4.48115	0.000164388	0.0020142
4689	NCF4	1.08106	7.02291	4.47883	0.000165346	0.00202106
101928844	LOC101928844	-0.996672	3.37166	-4.47722	0.000166018	0.00202804
283270	LOC283270	-0.82419	5.85216	-4.47556	0.000166711	0.00203404
3067	HDC	2.04914	3.74632	4.47346	0.000167591	0.00203983
85477	SCIN	1.17919	9.03037	4.47173	0.000168323	0.0020475
196	AHR	0.615338	9.57122	4.47048	0.000168854	0.00205273
54102	CLIC6	2.50096	5.1937	4.46923	0.000169385	0.00205784
8736	MYOM1	-0.839111	7.45903	-4.46901	0.000169479	0.00205784
27075	TSPAN13	0.616405	10.8693	4.46742	0.000170155	0.00206445
9142	TMEM257	-1.58987	5.45637	-4.46725	0.000170228	0.00206445
54491	FAM105A	1.16685	6.78007	4.46541	0.000171016	0.00207027
503639	DUXAP10	1.16162	6.41649	4.46498	0.000171201	0.00207127
26031	OSBPL3	0.805988	8.34977	4.46321	0.000171963	0.00207851
8437	RASAL1	1.22451	6.97327	4.46311	0.000172006	0.00207851
383	ARG1	-0.969427	3.11185	-4.46282	0.000172134	0.00207881
64236	PDLIM2	-0.596092	11.4143	-4.46087	0.000172977	0.00208774
1767	DNAH5	1.66313	7.04906	4.45966	0.000173503	0.00209284
126823	KLHDC9	-0.626583	8.3616	-4.45661	0.000174838	0.00210768
124930	ANKRD13B	1.09957	6.95483	4.44785	0.000178729	0.00214751
11004	KIF2C	1.00519	4.61283	4.44454	0.000180223	0.00215967
55423	SIRPG	1.45325	4.41767	4.44345	0.000180715	0.00216356
84281	C2orf88	-0.999787	7.48478	-4.44311	0.000180869	0.00216356
340719	NANOS1	1.16519	6.10151	4.43977	0.000182396	0.00217923
5241	PGR	-0.848736	8.66468	-4.4387	0.000182886	0.00218251
51557	LGSN	-1.39055	3.13377	-4.43679	0.000183764	0.00219128
84868	HAVCR2	1.13709	9.03847	4.43663	0.000183839	0.00219128
22891	ZNF365	1.53899	4.92687	4.43522	0.000184489	0.00219514
8842	PROM1	1.23197	11.1814	4.43351	0.000185287	0.00220203
256691	MAMDC2	1.59506	8.11199	4.43194	0.000186018	0.00220681
1128	CHRM1	-0.966296	4.06771	-4.43043	0.000186724	0.00221388
60675	PROK2	-1.99927	5.07463	-4.4301	0.000186878	0.00221441
10714	POLD3	-0.69837	8.84101	-4.42965	0.000187089	0.00221561
84856	LINC00839	-0.934075	11.2523	-4.42597	0.000188829	0.00222576
6696	SPP1	0.901813	12.2589	4.42551	0.000189048	0.00222692
57458	TMCC3	-0.884087	10.8612	-4.41912	0.000192108	0.00225368
10344	CCL26	1.36424	4.45825	4.41883	0.000192247	0.00225368
2012	EMP1	0.585652	10.8222	4.41218	0.000195484	0.00228549
3321	IGSF3	0.775167	8.99922	4.40846	0.000197318	0.00230426
5662	PSD	0.585276	4.40342	4.40704	0.000198028	0.0023104
7262	PHLDA2	0.866489	5.79353	4.40694	0.000198073	0.0023104
8600	TNFSF11	1.42509	3.23397	4.4063	0.000198393	0.00231279
728431	LINC01137	0.72258	6.16364	4.40128	0.000200909	0.00233671
3075	CFH	1.3086	9.94729	4.39839	0.000202375	0.00235207
9603	NFE2L3	-0.754801	9.84479	-4.39822	0.000202463	0.00235207
123591	C15orf27	-1.24694	9.57071	-4.39681	0.000203181	0.00235892
11075	STMN2	2.72871	4.61913	4.3966	0.000203287	0.00235892
114801	TMEM200A	0.668763	9.97648	4.39516	0.000204023	0.00236474
162963	ZNF610	-0.671285	7.57731	-4.39445	0.000204388	0.00236625
4953	ODC1	-0.605013	10.2423	-4.39367	0.000204787	0.00236922
79694	MANEA	-0.594148	9.62491	-4.39306	0.000205105	0.00236922
409	ARRB2	0.767691	7.19313	4.39302	0.000205123	0.00236922
1638	DCT	-0.787652	4.04405	-4.39123	0.000206046	0.00237726
135398	C6orf141	1.32166	3.36038	4.39063	0.000206358	0.0023795
283075	LOC283075	-0.887964	6.16304	-4.38926	0.000207071	0.00238498
213	ALB	-3.64967	9.10904	-4.38438	0.000209625	0.00241165
56934	CA10	-1.88533	9.64936	-4.38118	0.000211315	0.00242832
54913	RPP25	0.756867	6.99003	4.37997	0.000211958	0.00243346
309	ANXA6	0.609388	10.8647	4.37966	0.000212125	0.00243346
554202	MIR31HG	1.4278	4.18994	4.37838	0.000212809	0.00243609
8975	USP13	-0.784037	9.19137	-4.37776	0.000213136	0.00243674
27106	ARRDC2	-0.91675	8.19312	-4.37699	0.000213552	0.00244011
10124	ARL4A	0.612065	8.39863	4.37641	0.000213863	0.00244228
1789	DNMT3B	0.898868	6.17526	4.37593	0.00021412	0.00244383
2700	GJA3	-1.09477	10.2427	-4.37485	0.000214701	0.00244908
57118	CAMK1D	0.715489	7.77863	4.37303	0.000215686	0.00245892
57571	CARNS1	-0.730358	6.5729	-4.37222	0.000216126	0.00246255
56479	KCNQ5	1.32768	5.03695	4.36772	0.000218582	0.00248772
6870	TACR3	-0.664624	3.13662	-4.36717	0.000218883	0.0024882
9934	P2RY14	1.67518	6.9041	4.36709	0.000218927	0.0024882
100192386	FLJ16779	1.63228	3.9956	4.36697	0.000218995	0.0024882
3775	KCNK1	1.08135	8.22847	4.36526	0.000219939	0.00249751
93273	LEMD1	1.48244	5.13878	4.36415	0.000220548	0.00250302
541471	MIR4435-1HG	0.654673	5.51387	4.36313	0.000221118	0.00250667
412	STS	0.697864	8.90475	4.36151	0.00022202	0.00251396
84631	SLITRK2	-1.11148	5.07519	-4.3613	0.000222136	0.00251396
50619	DEF6	0.985776	6.92452	4.36078	0.000222426	0.00251544
387597	ILDR2	-0.760472	10.3412	-4.35833	0.000223798	0.00252709
6649	SOD3	1.25564	8.5958	4.35645	0.000224854	0.00253619
375775	PNPLA7	-0.592348	5.5977	-4.35529	0.000225511	0.00254217
153328	SLC25A48	-1.528	5.59274	-4.35285	0.000226897	0.00255551
255031	LINC00957	-0.808919	9.10306	-4.35252	0.000227087	0.00255564
53904	MYO3A	1.19187	4.80007	4.35155	0.000227643	0.00255904
400954	EML6	0.754018	4.87629	4.35133	0.000227769	0.00255904
388135	C15orf59	-1.13615	9.29137	-4.35037	0.000228315	0.00256374
8796	SCEL	1.26727	3.09975	4.3501	0.000228472	0.00256408
5521	PPP2R2B	-0.735477	8.92649	-4.34692	0.000230306	0.00258322
29851	ICOS	1.06344	3.54191	4.34515	0.000231332	0.00259185
1718	DHCR24	0.885578	10.2258	4.34428	0.000231836	0.00259605
1080	CFTR	2.27965	5.19761	4.34397	0.000232016	0.00259662
10926	DBF4	0.626422	7.09431	4.34354	0.000232267	0.00259799
83451	ABHD11	0.585243	8.75459	4.34077	0.000233888	0.00261322
687	KLF9	-0.74214	9.89896	-4.33985	0.000234429	0.0026173
58500	ZNF250	-1.13617	8.03163	-4.33885	0.000235021	0.00262006
163933	FAM43B	1.08108	5.66835	4.33662	0.000236336	0.00263037
7424	VEGFC	0.867631	9.84531	4.33568	0.000236899	0.00263517
2014	EMP3	0.656015	11.302	4.33435	0.000237687	0.00264249
80114	BICC1	0.936502	10.2955	4.33236	0.000238882	0.00265138
1116	CHI3L1	-1.09075	11.8426	-4.33006	0.000240261	0.00266416
9076	CLDN1	1.31594	10.768	4.33	0.000240298	0.00266416
7710	ZNF154	-0.784168	4.62424	-4.32972	0.00024047	0.00266461
117283	IP6K3	-1.13975	8.33109	-4.32881	0.000241019	0.00266922
283104	SBF2-AS1	-0.868128	6.6154	-4.32766	0.000241717	0.00267547
5021	OXTR	2.1031	7.34467	4.32639	0.000242487	0.00268253
10568	SLC34A2	2.52468	5.25485	4.32583	0.000242828	0.00268483
3248	HPGD	-1.22767	11.4879	-4.32402	0.000243935	0.00269541
4609	MYC	1.15994	6.24752	4.32383	0.000244052	0.00269541
83699	SH3BGRL2	-0.673604	11.5218	-4.32346	0.000244279	0.00269643
2171	FABP5	1.11954	9.36365	4.32317	0.000244456	0.00269673
1602	DACH1	-1.08234	10.0808	-4.32173	0.000245344	0.00270374
130026	ICA1L	-0.779752	8.62189	-4.31967	0.000246614	0.00271389
54328	GPR173	-0.788583	7.03454	-4.31794	0.000247686	0.0027236
2199	FBLN2	1.62381	6.52501	4.31727	0.000248106	0.00272525
348035	MGC40069	-1.96353	5.1476	-4.31614	0.000248812	0.00272854
814	CAMK4	1.12322	5.11077	4.31491	0.000249579	0.00273546
81035	COLEC12	2.74085	8.0241	4.30863	0.000253549	0.00277294
378805	LINC-PINT	-0.687107	8.31554	-4.30813	0.000253865	0.00277489
10788	IQGAP2	-0.763515	10.813	-4.30773	0.000254118	0.00277616
386618	KCTD4	1.19894	4.59144	4.30599	0.000255231	0.00278529
79567	FAM65A	-0.691246	11.4539	-4.30473	0.000256042	0.00279263
401262	CRIP3	-0.699611	4.78979	-4.30416	0.00025641	0.00279513
4645	MYO5B	0.834531	8.88694	4.30366	0.000256727	0.00279708
55243	KIRREL	-0.804931	10.4773	-4.30268	0.000257363	0.00279958
390	RND3	0.69916	10.1449	4.30253	0.000257457	0.00279958
799	CALCR	-1.16381	6.40389	-4.30163	0.000258044	0.00279958
3240	HP	2.07309	5.9589	4.30148	0.000258142	0.00279958
152048	FLJ31715	-1.02162	5.46363	-4.3014	0.000258189	0.00279958
1840	DTX1	1.23295	7.25337	4.30028	0.000258917	0.00280576
1909	EDNRA	1.0674	9.83556	4.29938	0.000259503	0.0028091
8061	FOSL1	1.40125	5.12884	4.29698	0.000261073	0.00282457
685	BTC	-0.840178	7.76959	-4.29649	0.000261393	0.00282523
6542	SLC7A2	0.984324	8.40931	4.29508	0.000262322	0.00283353
4602	MYB	1.69357	5.42878	4.29427	0.000262854	0.00283775
160335	TMTC2	1.6599	7.24981	4.29399	0.000263039	0.00283823
201501	ZBTB7C	-0.989075	8.59037	-4.29342	0.000263414	0.00283924
7042	TGFB2	0.845027	10.5106	4.29157	0.000264642	0.00284855
6508	SLC4A3	0.732019	5.47388	4.29121	0.00026488	0.00284855
79961	DENND2D	1.03255	8.39353	4.29118	0.000264898	0.00284855
189	AGXT	-2.54926	5.90022	-4.29114	0.000264929	0.00284855
79095	C9orf16	0.587469	8.7238	4.29105	0.000264984	0.00284855
340554	ZC3H12B	-0.747271	7.30949	-4.29052	0.000265341	0.00285086
716	C1S	0.690245	10.6545	4.28715	0.000267597	0.00287203
9200	PTPLA	0.947664	6.77932	4.2865	0.000268032	0.00287364
89801	PPP1R3F	-0.913273	6.66508	-4.28528	0.000268856	0.00288081
64221	ROBO3	0.975947	7.23827	4.28508	0.000268986	0.00288081
9569	GTF2IRD1	0.590203	8.70748	4.28288	0.00027048	0.00288396
7133	TNFRSF1B	0.659867	9.19476	4.28275	0.000270568	0.00288396
220134	SKA1	0.759815	2.77825	4.28227	0.000270895	0.00288592
84140	FAM161A	-0.711793	6.95668	-4.27922	0.000272976	0.00290349
256979	SUN3	-0.616119	3.86741	-4.27832	0.00027359	0.00290695
64130	LIN7B	-0.65642	7.62745	-4.27689	0.000274575	0.00291588
83468	GLT8D2	0.948332	8.9386	4.27202	0.000277952	0.00294708
9768	KIAA0101	1.14122	7.60452	4.27167	0.000278198	0.00294814
56952	PRTFDC1	1.04772	7.82724	4.26956	0.000279671	0.00296064
57648	KIAA1522	0.916899	7.48626	4.26887	0.000280159	0.00296424
55295	KLHL26	-0.62262	6.42688	-4.26511	0.000282813	0.00299075
57463	AMIGO1	-0.675856	9.52975	-4.26264	0.000284576	0.00300467
8741	TNFSF13	0.688267	9.37641	4.26147	0.000285407	0.00301029
4897	NRCAM	1.1345	6.85608	4.26067	0.000285984	0.00301446
28984	RGCC	1.03196	7.87623	4.25517	0.000289955	0.00304869
285489	DOK7	-0.692834	7.10159	-4.25405	0.000290777	0.00305415
1366	CLDN7	1.04466	7.87201	4.25344	0.000291222	0.00305723
81848	SPRY4	-0.818081	9.78934	-4.25185	0.000292382	0.0030662
5732	PTGER2	0.916097	7.55515	4.25094	0.000293052	0.00307142
25802	LMOD1	1.24731	6.98211	4.24997	0.000293768	0.00307434
706	TSPO	0.596322	10.6492	4.2471	0.000295889	0.00309012
10057	ABCC5	0.648535	9.64449	4.24605	0.000296672	0.0030951
55170	PRMT6	-0.680684	8.49691	-4.24534	0.000297198	0.00309898
7272	TTK	1.16511	3.59165	4.24161	0.000299993	0.00312489
6422	SFRP1	1.25934	10.4678	4.24008	0.000301145	0.00313466
81671	VMP1	1.0345	10.2672	4.23855	0.000302308	0.00314413
241	ALOX5AP	1.23559	7.14194	4.2349	0.000305086	0.00316811
23670	TMEM2	-0.7649	8.914	-4.23249	0.000306935	0.00318567
1364	CLDN4	1.2077	7.63733	4.2301	0.000308781	0.00320154
100128327	TRAPPC3L	-1.01849	5.61613	-4.22853	0.000310001	0.00320852
58160	NFE4	-1.42795	2.85522	-4.22821	0.00031025	0.00320852
55711	FAR2	0.960722	7.74964	4.2261	0.000311901	0.00322394
79971	WLS	0.622005	10.2086	4.22584	0.000312105	0.00322439
9212	AURKB	0.931999	5.78267	4.22236	0.000314835	0.00324428
27087	B3GAT1	0.765859	5.59524	4.22166	0.000315391	0.00324835
9294	S1PR2	0.852688	7.76597	4.22013	0.000316607	0.0032592
51477	ISYNA1	0.594659	10.1137	4.21872	0.000317729	0.00326742
64168	NECAB1	-1.51844	6.79528	-4.21534	0.000320435	0.00328853
80315	CPEB4	-0.609933	9.93292	-4.21447	0.000321132	0.00329401
10402	ST3GAL6	-0.69858	11.4515	-4.21359	0.000321844	0.00329628
4603	MYBL1	0.910357	7.70206	4.21048	0.000324361	0.00331874
9228	DLGAP2	-1.68975	4.54844	-4.21048	0.000324365	0.00331874
162461	TMEM92	1.63913	5.04623	4.20822	0.000326208	0.0033342
285848	PNPLA1	-1.05043	3.51109	-4.2073	0.000326956	0.00333846
440603	BCL2L15	1.39052	4.5546	4.203	0.000330509	0.00336535
10785	WDR4	0.643553	8.03961	4.2027	0.000330758	0.00336535
79827	CLMP	0.673716	4.83813	4.20229	0.000331098	0.00336711
54361	WNT4	0.831657	4.60819	4.20189	0.000331423	0.00336864
4900	NRGN	-0.731959	9.21455	-4.2017	0.000331583	0.00336864
79140	CCDC28B	0.603143	6.17309	4.20119	0.000332006	0.00337124
60676	PAPPA2	2.03925	8.5027	4.2006	0.000332499	0.00337454
5570	PKIB	1.17123	6.40553	4.19783	0.000334818	0.00339638
161436	EML5	-0.65514	8.13881	-4.19707	0.000335461	0.00339777
100124700	HOTAIR	1.70087	4.9603	4.1964	0.000336019	0.00340171
828	CAPS	0.842398	7.76545	4.19612	0.000336259	0.00340243
51741	WWOX	-0.744828	8.76611	-4.194	0.000338052	0.00341886
729993	SHISA9	1.27507	5.41854	4.19346	0.000338512	0.00342179
8082	SSPN	0.906171	9.50176	4.19009	0.000341381	0.00344733
4016	LOXL1	0.612208	9.11722	4.18954	0.000341853	0.00345037
4069	LYZ	0.71275	11.2803	4.18637	0.000344578	0.00347266
558	AXL	0.688268	11.2923	4.18592	0.000344967	0.00347484
5020	OXT	-0.708524	5.01704	-4.18479	0.000345951	0.00348301
9473	THEMIS2	0.828737	7.76228	4.18394	0.000346688	0.00348869
2538	G6PC	-2.36312	10.4994	-4.18302	0.000347488	0.00349325
101060391	LOC101060391	1.29057	7.47148	4.1827	0.000347766	0.00349431
9050	PSTPIP2	1.05676	7.45508	4.18166	0.000348671	0.00350117
2028	ENPEP	-0.905744	11.4083	-4.17891	0.00035109	0.00351893
1101	CHAD	-0.67284	4.50991	-4.178	0.000351885	0.0035234
3976	LIF	1.72463	5.82651	4.17719	0.000352605	0.00352646
8111	GPR68	1.04514	6.27049	4.17706	0.000352716	0.00352646
1880	GPR183	1.32477	6.72774	4.17328	0.000356074	0.00355474
23285	KIAA1107	-0.596541	6.53098	-4.17044	0.000358625	0.00357651
9956	HS3ST2	2.71903	4.90293	4.16964	0.000359344	0.00357686
4118	MAL	0.981682	11.2193	4.16943	0.000359531	0.00357686
10643	IGF2BP3	0.939403	4.62339	4.16845	0.000360417	0.0035839
100507410	C1QTNF1-AS1	-0.840957	5.33365	-4.16724	0.000361513	0.00359302
11057	ABHD2	0.709677	9.69377	4.16509	0.000363467	0.00360888
80183	KIAA0226L	1.25969	6.7462	4.16405	0.000364409	0.00361468
113130	CDCA5	0.964884	6.48631	4.1602	0.00036795	0.00364404
1645	AKR1C1	0.801597	10.8282	4.15964	0.000368466	0.00364595
3718	JAK3	0.919772	8.21689	4.15731	0.000370622	0.00366368
91752	ZNF804A	-1.86499	7.7005	-4.15699	0.000370919	0.00366372
54845	ESRP1	-0.784226	8.90224	-4.15686	0.00037104	0.00366372
55315	SLC29A3	0.786293	7.80992	4.15672	0.00037117	0.00366372
9783	RIMS3	0.696037	8.51809	4.15511	0.000372671	0.00367493
54413	NLGN3	-0.936478	7.3408	-4.15422	0.000373498	0.00367769
9510	ADAMTS1	0.61141	10.3664	4.15047	0.000377032	0.00371067
170692	ADAMTS18	1.71096	4.81162	4.14633	0.000380962	0.00374508
50651	SLC45A1	-1.02616	9.15367	-4.1451	0.000382134	0.0037499
8630	HSD17B6	1.45062	5.52118	4.14345	0.000383723	0.00376183
57863	CADM3	1.68942	6.23349	4.14217	0.000384954	0.00377206
57549	IGSF9	-0.670333	4.90903	-4.13938	0.000387653	0.00379482
27240	SIT1	1.07774	5.09727	4.13809	0.000388912	0.00380529
23194	FBXL7	-0.587079	9.28308	-4.13761	0.000389373	0.00380654
79703	C11orf80	0.726687	6.69717	4.13757	0.000389417	0.00380654
3426	CFI	0.742037	10.6927	4.13308	0.000393826	0.00384219
100130449	PP14571	-0.957269	4.67644	-4.13157	0.000395313	0.00385483
3687	ITGAX	0.872423	7.42252	4.13107	0.000395814	0.00385735
80333	KCNIP4	1.3516	7.78044	4.12941	0.000397463	0.00386831
10149	GPR64	2.48252	4.06775	4.12892	0.000397949	0.00387116
10663	CXCR6	1.39943	5.22128	4.1251	0.000401771	0.00390314
283335	LOC283335	-0.679854	5.08862	-4.12301	0.000403883	0.00391566
9780	PIEZO1	-0.691138	8.87278	-4.12149	0.000405424	0.00392493
5947	RBP1	0.929196	9.78953	4.1213	0.000405617	0.00392493
340273	ABCB5	2.44628	4.19064	4.12029	0.000406645	0.00393299
2205	FCER1A	1.87162	7.56088	4.1199	0.00040704	0.00393492
5332	PLCB4	0.946202	9.00076	4.11807	0.000408918	0.00394686
51291	GMIP	0.780558	6.8152	4.11241	0.000414754	0.0039924
10409	BASP1	0.831971	9.85831	4.11239	0.000414769	0.0039924
4907	NT5E	1.1138	10.1455	4.1089	0.000418416	0.00402366
55287	TMEM40	-0.919338	5.6983	-4.10482	0.000422706	0.00405523
170690	ADAMTS16	1.52455	9.6761	4.10464	0.000422906	0.00405523
124222	PAQR4	0.712332	6.22125	4.10423	0.00042334	0.00405746
5187	PER1	-0.826652	8.98164	-4.10329	0.000424334	0.00406312
80336	PABPC1L	0.931955	7.68317	4.10278	0.000424874	0.00406637
202333	CMYA5	-1.12842	9.36468	-4.09933	0.000428564	0.00409779
5366	PMAIP1	0.912603	6.1308	4.09614	0.000431998	0.00412476
164312	LRRN4	1.58326	4.88681	4.09289	0.000435531	0.00414866
338653	KCNQ1-AS1	-0.918778	5.06725	-4.08866	0.000440168	0.00418887
221883	HOXA11-AS	1.053	6.02592	4.08747	0.000441478	0.00419936
3635	INPP5D	0.792262	7.84821	4.08602	0.000443084	0.00420858
27190	IL17B	0.730158	5.11952	4.08598	0.000443125	0.00420858
145820	LINC00924	1.1446	7.75962	4.08584	0.000443283	0.00420858
6332	SCN7A	-0.964098	9.71036	-4.08522	0.00044397	0.00421113
57412	AS3MT	-0.623214	9.41301	-4.08407	0.000445252	0.00422131
3026	HABP2	2.09615	7.84032	4.08376	0.000445596	0.00422258
1272	CNTN1	-0.892278	9.83209	-4.07901	0.000450925	0.00426706
151295	SLC23A3	-1.86039	8.38043	-4.07243	0.000458415	0.00433184
2357	FPR1	-0.885104	7.77885	-4.07001	0.000461207	0.0043521
338382	RAB7B	1.02166	5.82812	4.06948	0.000461815	0.0043558
100996455	LOC100996455	1.59245	3.67296	4.06917	0.000462172	0.00435713
5004	ORM1	-0.727351	3.77781	-4.06852	0.000462925	0.00436218
1302	COL11A2	-1.42857	6.78903	-4.06773	0.000463841	0.00436877
5156	PDGFRA	0.718831	10.6352	4.06741	0.000464208	0.00437019
375593	TRIM73	0.954477	6.35797	4.06699	0.000464701	0.00437279
6941	TCF19	0.690493	7.49283	4.06568	0.000466229	0.00438512
283848	CES4A	0.901205	6.00344	4.06499	0.000467036	0.00438657
221955	DAGLB	0.606921	7.33202	4.06329	0.00046902	0.00440111
7302	TYRO3P	-0.844605	4.74243	-4.06301	0.000469357	0.00440221
59353	TMEM35	0.94186	2.69937	4.06147	0.000471159	0.00441501
80760	ITIH5	-0.671316	10.9979	-4.06054	0.000472264	0.0044233
26762	HAVCR1	1.5106	4.00572	4.06034	0.000472502	0.00442348
53346	TM6SF1	0.728215	7.75231	4.05867	0.000474477	0.00443985
201456	FBXO15	-0.645262	6.60665	-4.05833	0.000474878	0.00443985
4661	MYT1	-1.28549	5.86804	-4.0583	0.000474912	0.00443985
2571	GAD1	-1.27256	4.92245	-4.05594	0.000477734	0.00445797
221322	TBC1D32	-0.602657	5.69383	-4.0556	0.000478137	0.00445966
441242	LOC441242	-1.39544	5.02396	-4.05374	0.000480363	0.00447628
81029	WNT5B	0.981226	7.00911	4.05298	0.000481276	0.00448064
3750	KCND1	0.795517	6.42724	4.05265	0.000481675	0.00448229
64581	CLEC7A	0.971284	8.33976	4.05103	0.000483637	0.00449848
11069	RAPGEF4	-0.756251	9.67409	-4.04691	0.000488644	0.00453587
83875	BCO2	1.02535	5.93002	4.04644	0.000489213	0.00453587
284367	SIGLEC17P	0.903857	3.64134	4.04643	0.000489233	0.00453587
79070	KDELC1	0.956655	9.58735	4.04614	0.000489585	0.00453705
51279	C1RL	0.640041	8.40884	4.04587	0.000489914	0.00453801
122786	FRMD6	0.624614	8.73044	4.0446	0.000491479	0.00454832
1555	CYP2B6	-1.3793	7.37451	-4.04312	0.000493295	0.00456304
860	RUNX2	0.955862	8.47097	4.04265	0.000493881	0.00456427
27147	DENND2A	1.14937	6.18336	4.04218	0.000494457	0.0045654
3479	IGF1	-2.01605	9.06144	-4.04115	0.000495738	0.00457304
321	APBA2	1.33193	6.15791	4.04007	0.000497074	0.00458294
54509	RHOF	0.987777	7.89538	4.03975	0.000497474	0.00458294
90427	BMF	1.14624	6.95842	4.03967	0.000497571	0.00458294
29886	SNX8	-0.656092	8.96677	-4.03955	0.00049772	0.00458294
28954	REM1	0.680752	5.67677	4.03932	0.000498014	0.00458355
4188	MDFI	0.87198	5.47976	4.03881	0.000498641	0.00458722
8870	IER3	0.589305	11.5336	4.03485	0.000503611	0.0046227
441168	FAM26F	0.984519	9.01245	4.03482	0.000503644	0.0046227
760	CA2	-1.12022	10.7245	-4.03252	0.000506555	0.00464307
4778	NFE2	-0.777179	4.61032	-4.03154	0.000507799	0.00465236
9586	CREB5	1.39679	5.21467	4.03086	0.00050866	0.00465813
5365	PLXNB3	-0.796363	5.43909	-4.02732	0.000513177	0.00469441
400931	MIRLET7BHG	0.634018	5.32027	4.02721	0.000513321	0.00469441
63928	CHP2	-1.92694	5.44107	-4.02416	0.000517247	0.00472175
1847	DUSP5	-1.21736	8.35697	-4.02398	0.000517489	0.00472183
57381	RHOJ	0.660907	9.14683	4.02323	0.000518453	0.00472848
103344931	LOC103344931	-1.08487	9.94479	-4.02174	0.000520393	0.00474188
101927813	HMMR-AS1	0.700056	2.72705	4.0197	0.000523054	0.00476182
83540	NUF2	1.26564	4.99068	4.0191	0.000523832	0.00476392
6036	RNASE2	1.59651	6.18194	4.01898	0.000523994	0.00476392
6362	CCL18	3.9917	6.69225	4.0178	0.000525541	0.00477368
3034	HAL	-0.7837	3.89845	-4.01757	0.000525845	0.0047743
9890	LPPR4	1.00973	6.03479	4.01678	0.000526887	0.00478071
3763	KCNJ6	1.5515	3.65239	4.01577	0.000528219	0.00478938
55089	SLC38A4	-1.80733	5.04734	-4.01097	0.00053459	0.00484496
100131262	LOC100131262	0.791275	7.45227	4.00926	0.000536876	0.00486349
100126791	EGOT	-0.8118	6.48973	-4.00852	0.00053788	0.00486821
5350	PLN	0.986221	9.36017	4.00776	0.000538897	0.00487523
90853	SPOCD1	0.76291	4.3654	4.00599	0.000541287	0.00488808
219855	SLC37A2	1.38533	5.41745	4.0015	0.000547398	0.0049306
54363	HAO1	-2.11116	3.76178	-4.00077	0.000548397	0.0049368
6195	RPS6KA1	0.69527	8.65833	4.00046	0.000548813	0.00493833
257194	NEGR1	1.63723	6.58702	3.99975	0.000549788	0.00494073
3006	HIST1H1C	-0.771182	9.11602	-3.99888	0.000550988	0.00494907
54457	TAF7L	-1.26306	4.64384	-3.99702	0.000553552	0.00496767
57761	TRIB3	0.695268	5.95452	3.99504	0.000556306	0.00498573
9454	HOMER3	0.703285	7.31542	3.9945	0.000557059	0.00498746
4862	NPAS2	0.759051	7.75351	3.99442	0.000557168	0.00498746
4058	LTK	-1.15452	6.20034	-3.99135	0.00056146	0.00501853
4920	ROR2	1.36199	4.85472	3.98929	0.000564356	0.00503995
1287	COL4A5	-0.679091	9.29813	-3.98857	0.000565373	0.00504679
127495	LRRC39	1.05237	4.63471	3.98334	0.000572801	0.00510252
100500850	MIR3682	0.733001	5.07472	3.98328	0.000572882	0.00510252
8633	UNC5C	-0.720317	9.60615	-3.98118	0.000575899	0.00511981
6869	TACR1	-1.07357	7.74689	-3.98116	0.000575929	0.00511981
23046	KIF21B	1.16633	5.65418	3.98089	0.000576315	0.00511981
27239	GPR162	0.587459	5.80825	3.98076	0.000576503	0.00511981
54550	NECAB2	-1.4464	7.33756	-3.98069	0.000576601	0.00511981
26011	TENM4	1.61649	6.36904	3.97528	0.000584445	0.00518261
100507244	MAMDC2-AS1	-0.890194	3.32922	-3.9749	0.000585008	0.00518532
128239	IQGAP3	1.844	6.19146	3.9676	0.000595763	0.00526907
755	C21orf2	-0.619081	9.06444	-3.96653	0.000597359	0.00527855
1473	CST5	1.19418	5.34594	3.96512	0.000599473	0.00529027
6850	SYK	0.980977	8.42227	3.9638	0.000601441	0.00530408
100506377	LINC00973	1.75157	3.87533	3.96349	0.000601917	0.00530487
140766	ADAMTS14	0.620081	3.90817	3.963	0.000602647	0.00530898
57228	SMAGP	0.609641	8.93949	3.95611	0.00061311	0.00538938
79442	LRRC2	-0.968692	10.6098	-3.95523	0.000614455	0.00539884
5321	PLA2G4A	1.20708	7.18667	3.9548	0.000615115	0.00539993
81706	PPP1R14C	1.2426	8.26816	3.95422	0.000616004	0.00540538
169044	COL22A1	1.488	4.8686	3.95345	0.000617186	0.00541104
9358	ITGBL1	2.2803	8.25776	3.95303	0.000617834	0.00541266
5924	RASGRF2	0.682956	7.99852	3.95126	0.000620569	0.0054289
2940	GSTA3	-1.50044	5.30132	-3.95069	0.000621459	0.00543234
1215	CMA1	1.27194	3.51294	3.94912	0.000623898	0.00545093
80727	TTYH3	0.798621	7.24052	3.94569	0.000629259	0.00548278
23493	HEY2	1.0573	7.45568	3.94561	0.000629387	0.00548278
376267	RAB15	0.69889	7.21542	3.94557	0.000629448	0.00548278
23108	RAP1GAP2	1.56438	7.69117	3.93805	0.000641374	0.00557669
7732	RNF112	1.45466	5.8649	3.93754	0.000642192	0.00557932
55692	LUC7L	0.670151	10.3143	3.93628	0.000644208	0.00558965
11227	GALNT5	1.89056	4.27015	3.93541	0.000645609	0.00559695
55130	ARMC4	1.85088	5.37882	3.93517	0.000646001	0.00559793
10878	CFHR3	1.37782	3.20273	3.93369	0.000648387	0.005613
148741	ANKRD35	1.17298	5.58303	3.93357	0.000648575	0.005613
101241892	NPTN-IT1	1.23475	7.88857	3.93116	0.000652492	0.00563481
145837	LOC145837	-1.91178	6.39376	-3.93051	0.000653541	0.00564122
1606	DGKA	0.726774	8.0399	3.93036	0.000653795	0.00564122
27254	CSDC2	-0.668042	9.17026	-3.92863	0.000656615	0.00565829
3934	LCN2	2.82602	6.14368	3.928	0.00065765	0.00566478
79695	GALNT12	0.744205	7.39463	3.92773	0.000658101	0.00566625
10859	LILRB1	0.949664	6.4271	3.92745	0.000658558	0.00566664
7464	CORO2A	-0.756625	6.9579	-3.92715	0.00065905	0.00566715
201617	LINC00870	-0.704935	2.83512	-3.92671	0.000659777	0.00566782
6326	SCN2A	1.30367	7.30043	3.92642	0.000660253	0.00566782
9659	PDE4DIP	-1.04098	9.06173	-3.92614	0.000660707	0.00566931
57706	DENND1A	-0.640138	11.42	-3.92548	0.000661802	0.00567237
57705	WDFY4	0.823161	6.15523	3.92541	0.000661908	0.00567237
3786	KCNQ3	1.47039	5.18897	3.92466	0.000663153	0.00567822
54088	LINC00113	-1.40842	4.58298	-3.92366	0.000664811	0.00568999
4634	MYL3	-0.901181	8.74528	-3.92238	0.000666931	0.0057033
2919	CXCL1	1.49025	8.54426	3.9186	0.000673253	0.00574647
5742	PTGS1	0.69718	9.1963	3.91296	0.000682786	0.0058093
55010	PARPBP	1.00078	5.54104	3.91119	0.000685803	0.00582967
100630918	LOC100630918	-0.852694	6.39867	-3.91105	0.000686048	0.00582967
3149	HMGB3	0.603617	8.01694	3.91028	0.000687356	0.00583833
255877	BCL6B	0.808627	10.0023	3.90839	0.000690612	0.00586351
4035	LRP1	0.686709	9.30854	3.90803	0.000691238	0.00586636
730102	LOC730102	-0.609229	6.97419	-3.90755	0.000692058	0.00587084
55061	SUSD4	0.901188	7.04677	3.90644	0.000693982	0.00587974
54733	SLC35F2	0.945256	8.69929	3.90382	0.000698524	0.00591076
100505746	ITGB2-AS1	1.39453	6.88765	3.90188	0.000701915	0.00593439
3043	HBB	-1.99277	10.9472	-3.90171	0.000702199	0.00593439
100874253	LINC00853	-0.893399	6.23223	-3.90105	0.000703368	0.00594178
83690	CRISPLD1	2.05766	5.59638	3.9006	0.000704158	0.00594596
8497	PPFIA4	-1.20969	10.2112	-3.90039	0.000704512	0.00594646
57630	SH3RF1	-0.69811	9.81694	-3.89883	0.00070726	0.00596675
25992	SNED1	-0.713316	8.55192	-3.89518	0.000713733	0.00601302
100642175	SPRY4-IT1	1.33773	9.02984	3.89374	0.000716298	0.00603079
54769	DIRAS2	1.81183	5.65423	3.88762	0.000727296	0.00610553
145407	C14orf37	-1.30966	11.2577	-3.88719	0.000728077	0.00610954
5054	SERPINE1	1.22538	7.6035	3.88694	0.000728532	0.00611081
9540	TP53I3	0.671133	9.8383	3.88484	0.000732359	0.00613758
576	BAI2	1.14135	7.4094	3.88468	0.000732636	0.00613758
221061	FAM171A1	0.798468	10.3007	3.88355	0.000734713	0.00615242
347	APOD	-0.622833	12.3689	-3.88207	0.000737425	0.00617
4929	NR4A2	-1.33858	6.53222	-3.88161	0.000738266	0.00617447
6928	HNF1B	0.733932	10.4704	3.87779	0.000745326	0.00622836
3053	SERPIND1	-1.51403	5.06739	-3.87668	0.000747391	0.00624303
57573	ZNF471	-0.685356	7.9674	-3.87643	0.000747848	0.00624425
7088	TLE1	0.7194	9.75214	3.87579	0.00074905	0.00624911
84225	ZMYND15	0.980264	4.90175	3.87453	0.000751398	0.00626092
4935	GPR143	1.01651	8.02988	3.87311	0.000754062	0.00628052
339260	LOC339260	1.47882	3.86619	3.87235	0.000755498	0.00628729
1000	CDH2	0.77397	10.4001	3.86903	0.000761769	0.00632903
9662	CEP135	-0.586105	7.62005	-3.8682	0.000763332	0.00633899
100505664	LOC100505664	-1.43357	9.71565	-3.86797	0.00076377	0.00633899
222487	GPR97	-0.630942	4.25171	-3.86773	0.000764226	0.00633899
148523	CIART	0.911813	7.03655	3.8619	0.000775403	0.00641585
4286	MITF	0.634319	9.89751	3.86076	0.000777609	0.00642896
3783	KCNN4	1.23656	5.42093	3.8599	0.000779273	0.00643995
100505683	LINC01431	-0.771359	5.78956	-3.8583	0.000782394	0.00646309
100652740	PYCARD-AS1	0.836748	3.71457	3.85745	0.000784055	0.00647416
158295	MGC24103	1.11294	6.95805	3.85673	0.000785444	0.00648297
1043	CD52	1.10575	10.083	3.85612	0.000786655	0.0064903
1393	CRHBP	-0.99997	10.0783	-3.85443	0.000789962	0.00651415
788	SLC25A20	-0.625964	8.87732	-3.85259	0.000793589	0.00653949
202051	SPATA24	-0.870301	5.75142	-3.85172	0.00079531	0.00654919
8120	AP3B2	-1.13566	4.99177	-3.85166	0.000795416	0.00654919
145226	RDH12	-2.07492	6.24995	-3.84974	0.000799239	0.00657529
146227	BEAN1	1.42109	6.37042	3.84754	0.000803631	0.00660065
10871	CD300C	0.714313	4.8644	3.84553	0.000807647	0.00662823
2877	GPX2	1.80289	4.36929	3.84428	0.000810159	0.00664343
150946	GAREML	0.96652	5.7332	3.84387	0.000811002	0.00664609
2846	LPAR4	1.09724	4.1653	3.84342	0.000811903	0.00664692
221476	PI16	0.897931	6.15153	3.84213	0.000814504	0.0066628
64399	HHIP	1.21361	6.66326	3.83717	0.000824633	0.00673473
7276	TTR	-1.54703	7.35553	-3.83682	0.000825341	0.00673778
970	CD70	1.00506	4.97062	3.83581	0.000827417	0.0067438
6347	CCL2	1.17551	10.5791	3.8345	0.000830118	0.00676308
1524	CX3CR1	1.01061	8.92513	3.83303	0.000833152	0.00678492
2533	FYB	0.881335	8.19067	3.82856	0.000842482	0.00684997
84879	MFSD2A	1.44152	7.36583	3.82833	0.000842964	0.00685112
57134	MAN1C1	0.807387	8.35909	3.82743	0.000844839	0.00686083
124460	SNX20	0.923672	7.31495	3.82518	0.000849588	0.00689082
440854	CAPN14	0.871532	2.92322	3.8242	0.000851664	0.00689902
55679	LIMS2	-0.72062	8.96508	-3.82407	0.000851938	0.00689902
7252	TSHB	-1.07509	6.5705	-3.82266	0.000854919	0.00691761
85301	COL27A1	0.736528	9.09612	3.82111	0.000858232	0.00694162
79679	VTCN1	1.97401	5.76509	3.82013	0.000860327	0.00695341
4684	NCAM1	0.966267	8.08101	3.8201	0.000860379	0.00695341
2206	MS4A2	1.4308	3.64266	3.81719	0.000866637	0.00699277
2252	FGF7	1.31147	5.02927	3.81641	0.000868315	0.0070007
2150	F2RL1	1.13547	8.09899	3.81554	0.000870192	0.00700752
55260	TMEM143	-0.645717	7.36116	-3.81554	0.000870197	0.00700752
221301	FAM26D	-0.885661	4.44139	-3.81537	0.000870551	0.00700752
57139	RGL3	0.739309	7.54512	3.81349	0.000874636	0.00703759
100507650	RNF212B	-2.4739	6.43249	-3.81306	0.000875566	0.00704227
170685	NUDT10	-1.06064	7.46911	-3.81128	0.000879457	0.00707074
19	ABCA1	0.685982	7.69554	3.81071	0.000880693	0.00707785
26249	KLHL3	-0.689619	8.83174	-3.81031	0.000881568	0.00708064
284835	LINC00323	-1.51326	3.67789	-3.81023	0.000881743	0.00708064
2743	GLRB	1.16785	6.6	3.80967	0.000882984	0.00708544
81832	NETO1	1.70986	5.25956	3.80964	0.000883043	0.00708544
6279	S100A8	-1.2467	10.0485	-3.80905	0.000884328	0.00709292
25924	MYRIP	-1.20657	7.93691	-3.80867	0.000885183	0.00709696
2661	GDF9	-0.789474	3.31742	-3.80837	0.000885834	0.00709935
115273	RAB42	0.936872	5.62361	3.80817	0.000886284	0.00710014
26153	KIF26A	0.866956	7.14146	3.80359	0.000896428	0.0071757
5739	PTGIR	0.959797	6.09253	3.80298	0.000897784	0.00718357
80031	SEMA6D	-0.710991	9.81231	-3.80276	0.000898269	0.00718357
2139	EYA2	-0.675013	6.86359	-3.80267	0.00089848	0.00718357
54986	ULK4	-0.857109	7.31037	-3.80148	0.000901124	0.00719614
51514	DTL	1.72319	5.28563	3.80019	0.000904011	0.00721348
79776	ZFHX4	1.91686	4.33657	3.8	0.000904459	0.00721419
203100	HTRA4	1.2255	4.97436	3.79887	0.000907001	0.00723161
10309	CCNO	1.142	5.57129	3.79785	0.000909284	0.00724408
2324	FLT4	-0.820869	9.00102	-3.7973	0.000910543	0.00725125
117245	HRASLS5	-1.19805	5.31427	-3.79504	0.000915667	0.00728629
100129617	LOC100129617	-1.25209	5.24803	-3.79459	0.000916692	0.00729158
7678	ZNF124	-0.927261	8.62332	-3.79301	0.000920301	0.00730698
55215	FANCI	0.719708	7.72654	3.79294	0.000920441	0.00730698
140803	TRPM6	-2.40394	5.45375	-3.7926	0.000921222	0.00731029
644192	NR2F2-AS1	1.13152	7.0588	3.79128	0.000924242	0.00733108
118980	SFXN2	-1.01373	10.224	-3.79035	0.000926391	0.00734264
284233	CYP4F35P	-0.78998	4.21597	-3.78691	0.000934339	0.00739691
27319	BHLHE22	1.95024	4.88622	3.78541	0.000937833	0.00742166
3953	LEPR	-0.630739	9.44653	-3.78518	0.000938359	0.00742291
1491	CTH	-1.06066	6.77219	-3.78373	0.000941741	0.00743799
8828	NRP2	0.962128	7.26053	3.77843	0.000954209	0.00751697
122618	PLD4	0.706141	4.65798	3.77475	0.000962961	0.00757205
387647	PTCHD3P1	-0.611103	8.52486	-3.77332	0.000966407	0.00758694
10403	NDC80	0.720863	8.51637	3.77323	0.000966623	0.00758694
8406	SRPX	1.37276	7.04132	3.77119	0.000971513	0.00761534
1400	CRMP1	1.33618	5.40115	3.77109	0.000971753	0.00761534
100127983	C8orf88	-0.885465	8.66911	-3.76985	0.000974756	0.00763437
554235	ASPDH	-1.10786	5.92097	-3.76901	0.000976788	0.00763912
362	AQP5	0.762327	3.58303	3.76896	0.000976899	0.00763912
80342	TRAF3IP3	0.9824	6.97491	3.76777	0.000979794	0.00765533
641518	LEF1-AS1	1.68599	5.26288	3.76516	0.000986166	0.00769538
4323	MMP14	0.651888	7.59956	3.76312	0.000991159	0.00773135
72	ACTG2	1.15883	4.38894	3.75863	0.00100227	0.00780707
1949	EFNB3	1.14399	7.06322	3.75857	0.00100242	0.00780707
1520	CTSS	0.588147	9.5878	3.75732	0.00100552	0.00782822
3603	IL16	0.637828	7.98553	3.75696	0.00100643	0.00783227
8325	FZD8	-0.734752	8.24567	-3.75557	0.00100992	0.00785637
28999	KLF15	-1.03772	7.2965	-3.75335	0.00101549	0.00788507
922	CD5L	2.91477	4.73426	3.75092	0.00102162	0.00792294
3237	HOXD11	1.04978	5.85165	3.74915	0.0010261	0.00794719
85417	CCNB3	-0.642897	2.98637	-3.74907	0.00102632	0.00794719
89795	NAV3	1.4359	5.6105	3.7458	0.00103466	0.00799922
387535	HCRP1	1.25574	4.92265	3.74506	0.00103658	0.00800816
670	BPHL	-0.888704	9.12116	-3.74332	0.00104104	0.00803644
9966	TNFSF15	1.56958	7.90012	3.74124	0.00104644	0.00807123
348932	SLC6A18	-1.61573	5.12674	-3.74112	0.00104674	0.00807123
140862	ISM1	1.07541	8.75959	3.73933	0.0010514	0.0080991
117247	SLC16A10	-0.784343	8.42214	-3.7384	0.00105381	0.00810713
6948	TCN2	0.683049	9.98605	3.73743	0.00105635	0.00812351
84619	ZGPAT	-0.820029	9.06173	-3.73681	0.00105798	0.00812984
101928857	CTD-3080P12.3	-1.53632	5.62542	-3.73563	0.00106108	0.00814436
1472	CST4	1.18499	6.34817	3.73474	0.00106342	0.00815305
2215	FCGR3B	-1.38878	7.99379	-3.73357	0.00106651	0.00816993
100505738	MIR4458HG	-0.706602	7.48727	-3.73345	0.00106684	0.00816993
84171	LOXL4	1.03793	8.5792	3.7331	0.00106774	0.00817372
169026	SLC30A8	-1.35898	5.24894	-3.73219	0.00107017	0.00818916
100130776	AGAP2-AS1	0.630813	5.96473	3.73156	0.00107185	0.00819893
79705	LRRK1	0.708256	6.66028	3.73047	0.00107473	0.00821782
2888	GRB14	0.82601	9.73252	3.72956	0.00107715	0.00823013
85444	LRRCC1	-0.606972	7.39925	-3.72916	0.00107823	0.00823521
219790	RTKN2	1.08315	3.70264	3.72861	0.00107969	0.00824046
91010	FMNL3	0.600132	9.4978	3.7286	0.00107973	0.00824046
2322	FLT3	0.717269	4.12734	3.72737	0.00108303	0.0082625
6283	S100A12	-1.88324	5.32968	-3.72399	0.00109213	0.00832249
11226	GALNT6	1.13522	6.29307	3.72035	0.00110202	0.00838259
3339	HSPG2	0.617846	10.3339	3.72032	0.0011021	0.00838259
27294	DHDH	-1.5107	7.2035	-3.71859	0.00110683	0.00841227
8556	CDC14A	-0.863041	10.3756	-3.71687	0.00111155	0.00844492
113730	KLHDC7B	1.13009	4.20722	3.71592	0.00111419	0.0084586
3116	HLA-DPB2	1.31373	3.508	3.71228	0.00112428	0.00851914
56548	CHST7	0.614276	7.05708	3.71181	0.00112558	0.00852583
79623	GALNT14	0.656664	10.5603	3.70967	0.00113156	0.0085647
80206	FHOD3	0.99037	8.38443	3.70748	0.0011377	0.00860465
388650	FAM69A	0.752888	8.10011	3.70667	0.00113998	0.00861868
83729	INHBE	1.0513	4.53603	3.70615	0.00114145	0.00862656
5896	RAG1	-0.624617	7.98596	-3.70177	0.0011539	0.00870631
6003	RGS13	1.26058	3.22971	3.70137	0.00115502	0.00870631
100506451	RASSF8-AS1	-0.766106	9.22836	-3.70081	0.00115664	0.0087152
6582	SLC22A2	0.842509	9.86297	3.70026	0.00115821	0.00872377
7409	VAV1	0.862929	6.29981	3.69981	0.00115951	0.00873034
1002	CDH4	1.14598	4.39535	3.6986	0.00116297	0.00874669
647310	TEX22	-0.665908	3.97415	-3.69822	0.00116407	0.00875161
6751	SSTR1	0.906526	8.29072	3.69673	0.00116836	0.00877404
64131	XYLT1	-0.773883	8.6017	-3.69387	0.00117666	0.0088265
91624	NEXN	0.654153	8.45887	3.69312	0.00117886	0.00883973
54518	APBB1IP	1.03187	6.80132	3.69286	0.00117961	0.00884039
51473	DCDC2	0.681496	10.8644	3.69279	0.00117983	0.00884039
286367	LOC286367	-0.655241	7.55503	-3.69105	0.00118491	0.00887184
100287902	LGALS8-AS1	-0.941206	5.06724	-3.68749	0.00119538	0.00894026
84852	ATP1A1-AS1	-0.67827	7.81795	-3.6856	0.001201	0.00897567
114134	SLC2A13	-0.962927	9.08047	-3.6797	0.00121865	0.00909073
27287	VENTX	0.805494	5.45472	3.67945	0.00121939	0.00909124
2898	GRIK2	-0.684833	9.91214	-3.67937	0.00121962	0.00909124
7104	TM4SF4	1.36119	5.00413	3.67719	0.00122624	0.00912704
5255	PHKA1	-0.807057	6.46217	-3.66956	0.00124956	0.00926581
6692	SPINT1	0.630817	9.94319	3.66929	0.0012504	0.00926581
220441	RNF152	-1.60414	5.49915	-3.66639	0.0012594	0.00932214
627	BDNF	1.06802	6.4569	3.66625	0.00125985	0.00932214
113691	TUBA3FP	-0.852118	5.00633	-3.66534	0.00126266	0.00933953
1438	CSF2RA	1.037	6.10949	3.66399	0.00126688	0.00936039
9928	KIF14	1.50162	4.89139	3.66331	0.00126901	0.00936928
117581	TWIST2	0.831064	4.50126	3.66265	0.00127109	0.00937435
100507466	DPH6-AS1	-1.0724	5.32997	-3.66165	0.00127424	0.0093873
10993	SDS	1.08084	5.82394	3.66073	0.00127713	0.00939824
55846	ITFG2	0.679768	6.1343	3.66033	0.0012784	0.00940416
4128	MAOA	-0.601556	11.072	-3.65762	0.001287	0.00945362
79608	RIC3	-0.80454	5.3571	-3.65645	0.0012907	0.0094711
26032	SUSD5	1.17162	5.78345	3.65211	0.00130461	0.0095482
3833	KIFC1	0.922025	4.83991	3.64883	0.00131524	0.00960851
120103	SLC36A4	0.619994	8.31066	3.64776	0.00131869	0.00962678
1663	DDX11	1.02987	6.67956	3.64456	0.00132918	0.0096963
257629	ANKS4B	-1.17384	4.82387	-3.64328	0.00133337	0.00972334
440738	MAP1LC3C	1.40265	4.88438	3.6423	0.0013366	0.0097399
2918	GRM8	1.24513	4.24497	3.6406	0.00134221	0.0097688
84733	CBX2	0.916169	5.5771	3.63886	0.001348	0.0098043
4241	MFI2	-0.786359	6.11879	-3.6386	0.00134884	0.0098043
57669	EPB41L5	-0.632682	11.1618	-3.63373	0.00136516	0.00990629
57817	HAMP	1.06549	5.34994	3.63357	0.00136572	0.00990629
346389	MACC1	1.36201	5.96758	3.63077	0.00137518	0.00997052
400709	SIGLEC16	1.3752	3.86197	3.62951	0.00137946	0.00999436
57520	HECW2	-0.850478	10.5389	-3.62914	0.00138071	0.00999988
5625	PRODH	-1.10665	6.88836	-3.62208	0.00140498	0.0101356
10279	PRSS16	-1.06825	7.57424	-3.62128	0.00140775	0.0101519
5890	RAD51B	0.774534	5.85712	3.62085	0.00140924	0.0101591
7124	TNF	1.14386	6.47208	3.61979	0.00141294	0.0101784
84659	RNASE7	-0.849136	4.01368	-3.61855	0.00141724	0.0102021
10882	C1QL1	-1.24387	6.4309	-3.61703	0.00142256	0.0102352
3669	ISG20	0.665665	8.48074	3.6168	0.00142336	0.0102352
100505576	LINC00672	0.879002	6.97936	3.61526	0.00142878	0.0102668
404201	WDFY3-AS2	-0.608328	8.16496	-3.6147	0.00143076	0.0102766
91977	MYOZ3	-0.605461	6.40662	-3.61459	0.00143116	0.0102766
115350	FCRL1	0.649962	3.5435	3.61313	0.0014363	0.0103062
81930	KIF18A	0.997191	3.51392	3.60407	0.00146874	0.0104978
343450	KCNT2	1.09724	8.19412	3.60382	0.00146966	0.0105007
200931	SLC51A	-1.19927	7.49104	-3.60208	0.00147597	0.0105354
9955	HS3ST3A1	-0.736298	9.13675	-3.60204	0.00147609	0.0105354
130749	CPO	-0.849645	4.9621	-3.60107	0.00147965	0.0105533
3340	NDST1	0.698291	8.42391	3.60006	0.00148331	0.010572
7761	ZNF214	-0.62956	6.18824	-3.59885	0.00148776	0.0105925
7504	XK	-1.199	6.91765	-3.59643	0.00149663	0.0106394
113540	CMTM1	0.830462	4.94755	3.59634	0.00149699	0.0106394
5383	PMS2P5	1.15649	4.39289	3.59335	0.00150805	0.0106954
135250	RAET1E	-1.72336	5.58668	-3.58835	0.00152672	0.0108125
374378	GALNT18	0.596321	8.51962	3.58713	0.00153131	0.0108337
3679	ITGA7	0.663622	8.00215	3.58608	0.00153527	0.0108503
65250	C5orf42	-0.599135	6.22072	-3.58275	0.0015479	0.0109272
54716	SLC6A20	1.29051	4.25576	3.58255	0.00154869	0.0109272
350	APOH	-2.11735	8.28489	-3.58234	0.00154946	0.0109275
57476	GRAMD1B	-0.927866	7.05551	-3.58178	0.00155163	0.0109352
170954	PPP1R18	0.58859	7.42991	3.57918	0.00156158	0.0109853
54847	SIDT1	0.883677	5.13704	3.5769	0.00157034	0.0110208
23569	PADI4	-0.634186	4.34727	-3.57587	0.00157436	0.0110413
6579	SLCO1A2	1.66022	3.63576	3.57562	0.00157533	0.0110443
79230	ZNF557	0.72315	6.4099	3.57509	0.00157736	0.0110547
26287	ANKRD2	1.33207	5.96001	3.57485	0.00157828	0.0110561
654790	PCP4L1	-0.719779	3.14752	-3.57431	0.00158039	0.0110644
55840	EAF2	-1.14139	9.15751	-3.57353	0.00158342	0.0110779
129881	CCDC173	-0.954208	4.78828	-3.57263	0.00158693	0.0110981
4842	NOS1	1.69704	6.05816	3.56922	0.00160029	0.0111688
10170	DHRS9	1.31242	5.25765	3.56646	0.00161123	0.0112334
130399	ACVR1C	-1.07848	4.36814	-3.56561	0.00161457	0.0112528
5349	FXYD3	1.63048	5.1706	3.56517	0.00161632	0.0112612
84988	PPP1R16A	-0.622235	8.51569	-3.56417	0.0016203	0.0112811
27145	FILIP1	-0.754416	7.84693	-3.56243	0.00162725	0.01131
4163	MCC	-0.596385	10.183	-3.55714	0.00164854	0.01145
643988	C1orf233	0.670131	5.81197	3.55487	0.00165779	0.0115103
203859	ANO5	-0.78347	8.30384	-3.55444	0.00165951	0.0115183
133584	EGFLAM	0.934797	8.48844	3.55404	0.00166117	0.0115258
132660	LIN54	-0.59501	4.73038	-3.55117	0.00167291	0.0115776
81621	KAZALD1	0.908071	6.81972	3.55061	0.00167523	0.0115875
163702	IFNLR1	-0.647221	7.90496	-3.54919	0.00168106	0.0116153
388722	C1orf53	0.972603	6.81354	3.54894	0.00168212	0.0116153
116362	RBP7	0.601206	11.1406	3.54863	0.00168339	0.01162
100507487	LOC100507487	0.939539	5.67361	3.54726	0.00168907	0.0116482
2053	EPHX2	-0.763418	9.34912	-3.54725	0.0016891	0.0116482
1869	E2F1	0.867694	6.42879	3.54693	0.00169046	0.0116482
5603	MAPK13	0.87668	6.79488	3.54634	0.00169291	0.0116578
9134	CCNE2	0.619193	5.0196	3.54256	0.0017087	0.0117475
26526	TSPAN16	-0.598596	4.56883	-3.54252	0.00170885	0.0117475
100505797	LOC100505797	1.32097	3.72484	3.54153	0.00171303	0.0117682
3851	KRT4	-0.742195	3.83886	-3.54048	0.00171742	0.0117903
9173	IL1RL1	-1.00015	10.951	-3.53871	0.00172491	0.0118296
284266	SIGLEC15	1.17023	3.73125	3.53768	0.00172929	0.0118556
353500	BMP8A	-0.889128	6.02767	-3.53445	0.00174304	0.0119437
644353	ZCCHC18	0.84773	5.17049	3.53345	0.00174734	0.0119595
3777	KCNK3	1.14499	6.78424	3.53299	0.00174933	0.0119686
222234	FAM185A	-0.632176	4.69118	-3.52921	0.0017656	0.0120717
4973	OLR1	1.87428	6.59443	3.52738	0.00177357	0.0121089
9214	FAIM3	0.949738	6.39763	3.52668	0.00177662	0.0121183
100653022	PP12719	1.11947	6.40601	3.5253	0.00178264	0.0121521
64805	P2RY12	1.10283	3.64045	3.52478	0.00178493	0.0121626
[truncated: 573 more rows]
