# Supplementary material for: Rapid Identification of Potential Drugs for Diabetic Nephropathy Using Whole-Genome Expression Profiles of Glomeruli
Source: Biomed Res Int. 2016 Mar 16;2016:1634730. doi: 10.1155/2016/1634730 (PMC4812204; doi:10.1155/2016/1634730)
Supplement: Supplementary file 3 [file 1634730.f3.xlsx]

## Sheet: late_early_1fc.0.585_symbol
Entrez Gene ID	Gene Symbol	logFC	AveExpr	t	P.Value	adj.P.Val
54209	TREM2	2.70107	6.13102	9.5246	1.64225e-09	3.31013e-05
2532	ACKR1	3.24581	6.54852	9.17586	3.28904e-09	3.3147e-05
9509	ADAMTS2	1.80037	6.65208	8.22097	2.38813e-08	0.000155231
4481	MSR1	2.0766	5.37148	8.08654	3.18773e-08	0.000155231
401097	C3orf80	2.44961	5.32519	7.99918	3.85075e-08	0.000155231
1290	COL5A2	1.57407	8.71087	7.77495	6.28353e-08	0.000170946
8832	CD84	1.85935	6.61084	7.7568	6.53958e-08	0.000170946
1264	CNN1	1.86231	5.26545	7.74008	6.7849e-08	0.000170946
586	BCAT1	1.63609	7.74642	7.62028	8.843e-08	0.000180831
7805	LAPTM5	1.05306	10.7048	7.61377	8.97157e-08	0.000180831
2200	FBN1	1.10652	9.44513	7.45683	1.27323e-07	0.000197974
9450	LY86	1.90299	7.64008	7.40683	1.42443e-07	0.000197974
64231	MS4A6A	1.42947	10.1692	7.39094	1.47623e-07	0.000197974
79083	MLPH	2.46788	4.94296	7.38965	1.48055e-07	0.000197974
84034	EMILIN2	1.07896	8.92681	7.35867	1.5875e-07	0.000197974
3489	IGFBP6	1.57008	9.05977	7.34096	1.65218e-07	0.000197974
3778	KCNMA1	2.15636	6.9135	7.33628	1.66975e-07	0.000197974
165	AEBP1	1.28442	11.4044	7.29019	1.85305e-07	0.0002075
1293	COL6A3	1.5016	9.22463	7.24277	2.06323e-07	0.000218876
7305	TYROBP	1.33055	10.5917	7.20166	2.26521e-07	0.000228288
953	ENTPD1	0.765381	9.2885	7.12127	2.72083e-07	0.000261148
23601	CLEC5A	3.18321	5.77878	7.07295	3.03891e-07	0.000271458
87	ACTN1	0.964012	10.3988	7.0646	3.09761e-07	0.000271458
11006	LILRB4	1.58307	5.63223	7.02105	3.42322e-07	0.000287494
1278	COL1A2	1.43114	10.6383	6.98678	3.70392e-07	0.000298624
2210	FCGR1B	2.08523	7.06296	6.92702	4.25116e-07	0.000315844
100505702	LINC01094	2.16422	3.68399	6.91174	4.40393e-07	0.000315844
7058	THBS2	1.89107	10.1413	6.87875	4.75329e-07	0.000315844
7130	TNFAIP6	2.48072	6.27698	6.86981	4.85276e-07	0.000315844
960	CD44	1.10626	9.91731	6.86975	4.85339e-07	0.000315844
2359	FPR3	2.31963	5.85305	6.85968	4.96809e-07	0.000315844
2191	FAP	2.95277	5.56243	6.85568	5.01439e-07	0.000315844
79690	GAL3ST4	1.29572	7.71333	6.84227	5.17272e-07	0.000315944
3687	ITGAX	1.43363	7.42252	6.78848	5.86155e-07	0.000347486
5376	PMP22	0.821367	10.533	6.7513	6.39184e-07	0.000349477
3231	HOXD1	-0.926139	8.50494	-6.74445	6.49478e-07	0.000349477
11326	VSIG4	2.15011	7.91136	6.7418	6.53509e-07	0.000349477
50861	STMN3	1.08616	8.87355	6.72966	6.72278e-07	0.000349477
2209	FCGR1A	2.10666	5.18913	6.72717	6.76206e-07	0.000349477
113146	AHNAK2	2.9324	6.41542	6.67892	7.5694e-07	0.000381422
713	C1QB	1.77011	7.91148	6.64615	8.17348e-07	0.000401008
3958	LGALS3	0.894224	11.5459	6.63674	8.35598e-07	0.000401008
59	ACTA2	1.04834	11.5476	6.60453	9.01225e-07	0.000419946
51284	TLR7	1.73979	7.18155	6.59728	9.1673e-07	0.000419946
6876	TAGLN	1.09745	11.2956	6.50053	1.15148e-06	0.000505204
11010	GLIPR1	0.941102	9.83677	6.49998	1.15298e-06	0.000505204
1462	VCAN	2.01448	10.3022	6.48599	1.19173e-06	0.000511075
23189	KANK1	-0.593759	11.1834	-6.43986	1.32923e-06	0.00054038
6507	SLC1A3	2.48647	7.11589	6.43868	1.33293e-06	0.00054038
6710	SPTB	-1.44788	8.46011	-6.42424	1.37937e-06	0.00054038
6039	RNASE6	1.68562	8.63628	6.42379	1.38084e-06	0.00054038
29015	SLC43A3	0.978814	8.49495	6.41898	1.3967e-06	0.00054038
719	C3AR1	1.59635	8.07326	6.41173	1.42092e-06	0.00054038
4017	LOXL2	1.22221	7.73575	6.39525	1.4776e-06	0.000547298
9332	CD163	1.96724	8.99042	6.39077	1.49342e-06	0.000547298
26278	SACS	0.86331	9.14232	6.37796	1.53957e-06	0.000554136
929	CD14	1.07952	9.37058	6.36988	1.56942e-06	0.000554968
10184	LHFPL2	1.24152	8.25016	6.36071	1.60402e-06	0.000557426
2857	GPR34	1.97375	6.39425	6.34815	1.65269e-06	0.000564605
943	TNFRSF8	-0.991121	6.83394	-6.29704	1.86679e-06	0.000627116
4240	MFGE8	0.901404	9.36833	6.28879	1.90388e-06	0.000629091
4320	MMP11	1.31122	6.27274	6.27269	1.97851e-06	0.000643206
3903	LAIR1	1.70979	6.88202	6.21653	2.26299e-06	0.000724012
100132116	ACTA2-AS1	1.31843	5.38225	6.20751	2.31243e-06	0.000728272
2212	FCGR2A	1.22541	10.2457	6.19252	2.39703e-06	0.000743302
51809	GALNT7	0.664207	9.65333	6.17734	2.48591e-06	0.00075704
26585	GREM1	2.31639	4.65723	6.17225	2.51646e-06	0.00075704
23643	LY96	0.779535	10.7068	6.15479	2.62418e-06	0.000766564
64073	C19orf33	1.61599	8.01214	6.13167	2.77413e-06	0.000798792
80381	CD276	0.890645	8.65223	6.11771	2.86888e-06	0.00081444
3394	IRF8	1.37017	8.73916	6.0898	3.06824e-06	0.000858938
56925	LXN	0.662853	10.4334	6.06521	3.25568e-06	0.000898923
240	ALOX5	1.60594	7.24663	6.04853	3.38929e-06	0.00091499
2115	ETV1	0.878957	7.69442	6.04666	3.40466e-06	0.00091499
79713	IGFLR1	0.850318	7.07798	6.04084	3.45288e-06	0.000915739
29108	PYCARD	1.06449	8.79223	6.03289	3.51973e-06	0.000921348
4053	LTBP2	1.63295	9.81676	6.01013	3.71873e-06	0.000956458
1311	COMP	2.9687	6.8835	6.00681	3.74877e-06	0.000956458
4689	NCF4	1.44857	7.02291	6.00143	3.79783e-06	0.000956863
641	BLM	1.0368	5.46051	5.98318	3.96925e-06	0.000987707
241	ALOX5AP	1.73774	7.14194	5.95599	4.23939e-06	0.00104206
9645	MICAL2	0.611429	11.0274	5.93129	4.50109e-06	0.00108408
7096	TLR1	1.29473	7.28867	5.92975	4.51792e-06	0.00108408
4837	NNMT	1.93525	10.4394	5.91046	4.73443e-06	0.00112267
26508	HEYL	1.1913	8.07732	5.88472	5.03991e-06	0.00118121
55016	MARCH1	1.5361	7.63001	5.86046	5.34624e-06	0.00123861
26253	CLEC4E	1.63314	7.60837	5.85322	5.44123e-06	0.00124629
50863	NTM	1.82168	8.25223	5.8373	5.65629e-06	0.00128099
3071	NCKAP1L	1.46951	6.90372	5.83051	5.7506e-06	0.00128788
1291	COL6A1	0.758395	10.1827	5.82296	5.85728e-06	0.00129736
7097	TLR2	1.14724	7.07228	5.81373	5.9905e-06	0.00131244
81578	COL21A1	1.21558	7.99906	5.80427	6.13026e-06	0.0013279
2690	GHR	-0.680913	10.242	-5.80011	6.19282e-06	0.0013279
727936	GXYLT2	1.57516	8.71929	5.79408	6.28453e-06	0.00133338
5118	PCOLCE	1.41268	8.47975	5.78975	6.35134e-06	0.00133352
90332	EXOC3L2	-1.00167	8.86935	-5.78125	6.48437e-06	0.00134741
712	C1QA	1.64157	8.25279	5.76259	6.7866e-06	0.00139582
115908	CTHRC1	2.09211	7.93525	5.74782	7.03596e-06	0.00140182
1359	CPA3	2.80712	5.98227	5.74417	7.0991e-06	0.00140182
1382	CRABP2	1.31277	6.06313	5.73926	7.18479e-06	0.00140182
53831	GPR84	1.69025	3.82504	5.73442	7.27018e-06	0.00140182
10458	BAIAP2	-0.69612	9.23232	-5.73418	7.27451e-06	0.00140182
7837	PXDN	0.76744	10.5494	5.73386	7.28032e-06	0.00140182
54751	FBLIM1	0.970159	8.74803	5.73261	7.30259e-06	0.00140182
9497	SLC4A7	0.781847	8.53471	5.71899	7.54988e-06	0.00142856
6768	ST14	1.18872	8.32063	5.71717	7.58362e-06	0.00142856
51338	MS4A4A	1.95127	6.958	5.70827	7.75051e-06	0.0014407
7450	VWF	1.47751	7.70523	5.70614	7.79107e-06	0.0014407
139818	DOCK11	1.2422	8.97237	5.69782	7.95128e-06	0.00145331
1009	CDH11	1.10717	9.96202	5.69515	8.00345e-06	0.00145331
100505592	LINC01540	1.61324	4.27216	5.68845	8.13595e-06	0.00146418
51148	CERCAM	1.21955	8.04826	5.67536	8.40104e-06	0.00149851
1475	CSTA	1.23464	9.29165	5.66579	8.60045e-06	0.00152062
2131	EXT1	0.623064	10.1221	5.65778	8.77104e-06	0.0015373
140	ADORA3	1.58834	5.6251	5.65151	8.90691e-06	0.00154765
728	C5AR1	1.32472	8.80074	5.64119	9.13515e-06	0.00157126
64499	TPSB2	2.53969	6.98038	5.63837	9.19866e-06	0.00157126
341	APOC1	2.32495	9.213	5.63091	9.36863e-06	0.00158456
56998	CTNNBIP1	-0.929253	8.45048	-5.62809	9.43379e-06	0.00158456
2350	FOLR2	1.40297	9.44579	5.6178	9.67504e-06	0.00160485
286827	TRIM59	1.43861	6.57449	5.61231	9.8063e-06	0.00160485
57125	PLXDC1	1.65148	7.11745	5.61023	9.85669e-06	0.00160485
701	BUB1B	1.30553	5.43026	5.60955	9.87309e-06	0.00160485
5724	PTAFR	1.61023	6.72704	5.59417	1.02534e-05	0.00165335
1289	COL5A1	1.62	8.1927	5.59031	1.0351e-05	0.00165582
55723	ASF1B	1.45625	5.86687	5.5773	1.06875e-05	0.0016962
1958	EGR1	0.647459	11.6935	5.57254	1.08134e-05	0.00170277
4688	NCF2	1.02518	8.20233	5.56091	1.11273e-05	0.00173862
10123	ARL4C	1.56759	9.71562	5.54645	1.15303e-05	0.00177784
3918	LAMC2	1.54211	6.744	5.54559	1.15548e-05	0.00177784
64859	NABP1	0.843995	8.81872	5.53827	1.17649e-05	0.00179647
5366	PMAIP1	1.23237	6.1308	5.5314	1.19656e-05	0.0018133
4082	MARCKS	0.803104	11.1216	5.52837	1.20551e-05	0.0018133
60681	FKBP10	0.890156	9.2823	5.52373	1.21939e-05	0.00182059
9052	GPRC5A	-1.31226	10.7428	-5.5193	1.23277e-05	0.00182539
57502	NLGN4X	2.13686	5.40768	5.51662	1.24092e-05	0.00182539
822	CAPG	1.48174	9.35629	5.512	1.25515e-05	0.00182539
8792	TNFRSF11A	1.6596	4.63781	5.50079	1.29031e-05	0.00185179
714	C1QC	1.77972	9.37096	5.49201	1.31854e-05	0.00187159
8572	PDLIM4	1.21406	9.24838	5.48687	1.33536e-05	0.00187348
4064	CD180	1.40184	6.95964	5.48593	1.33846e-05	0.00187348
56649	TMPRSS4	1.55985	8.43147	5.47688	1.3687e-05	0.00190258
10659	CELF2	0.914834	9.57804	5.47178	1.38601e-05	0.00191346
7941	PLA2G7	2.61544	6.56987	5.46475	1.41028e-05	0.00192065
100506725	LOC100506725	-1.73542	6.35812	-5.45143	1.45745e-05	0.00197157
84986	ARHGAP19	-0.992473	10.5895	-5.4188	1.57981e-05	0.00212285
4629	MYH11	1.16105	9.64866	5.39855	1.66094e-05	0.00218898
85449	KIAA1755	1.46727	5.0892	5.39237	1.68651e-05	0.00218898
107	ADCY1	-1.32902	7.62365	-5.39135	1.69078e-05	0.00218898
1436	CSF1R	1.2802	8.40437	5.38676	1.71009e-05	0.00218898
83439	TCF7L1	-0.586374	10.4004	-5.38606	1.71305e-05	0.00218898
89857	KLHL6	1.3137	4.70168	5.38374	1.72294e-05	0.00218898
10962	MLLT11	0.897376	9.54594	5.3829	1.72649e-05	0.00218898
2760	GM2A	0.665588	10.6003	5.38284	1.72677e-05	0.00218898
6614	SIGLEC1	1.60622	6.85233	5.37109	1.77772e-05	0.00223949
10360	NPM3	0.883547	7.70501	5.36132	1.82124e-05	0.00227243
7177	TPSAB1	2.26697	7.29601	5.36017	1.82642e-05	0.00227243
284021	MILR1	1.38781	4.97772	5.35552	1.84759e-05	0.00228467
114898	C1QTNF2	0.892025	4.87709	5.34516	1.89564e-05	0.00232978
9103	FCGR2C	1.34706	7.35111	5.33058	1.96537e-05	0.00240085
1281	COL3A1	0.743839	11.6041	5.32715	1.98212e-05	0.00240673
55740	ENAH	0.685483	9.72302	5.31693	2.03303e-05	0.00245376
64866	CDCP1	1.72479	5.87674	5.31153	2.06042e-05	0.00246695
3800	KIF5C	1.54804	6.64626	5.30996	2.06844e-05	0.00246695
5329	PLAUR	0.861479	7.53618	5.30645	2.08655e-05	0.00247391
130733	TMEM178A	-1.09132	10.9135	-5.29948	2.12291e-05	0.0025023
3371	TNC	1.23725	9.70789	5.29488	2.14732e-05	0.00251636
54997	TESC	1.21881	7.26191	5.29131	2.16642e-05	0.00252407
11027	LILRA2	1.06354	7.13555	5.2767	2.24642e-05	0.00260223
2274	FHL2	0.886012	10.1243	5.27164	2.27478e-05	0.00260583
283316	CD163L1	1.3196	5.55943	5.27154	2.27538e-05	0.00260583
8707	B3GALT2	-1.46727	9.10696	-5.25658	2.36151e-05	0.00268918
2123	EVI2A	1.31147	7.11602	5.25292	2.38304e-05	0.00269846
27128	CYTH4	0.995948	7.138	5.24816	2.41141e-05	0.00271533
963	CD53	1.01915	10.1391	5.2233	2.56507e-05	0.00284075
8490	RGS5	1.06833	11.1637	5.21886	2.59356e-05	0.00285661
9754	STARD8	-0.649381	8.53722	-5.21448	2.62191e-05	0.00287213
27289	RND1	-1.00511	6.89916	-5.19521	2.75069e-05	0.00299692
27036	SIGLEC7	1.55398	6.14837	5.1835	2.83197e-05	0.0030549
219972	MPEG1	1.21038	9.81403	5.18318	2.83422e-05	0.0030549
51363	CHST15	1.18952	8.74352	5.1791	2.86313e-05	0.00306861
7351	UCP2	0.936337	10.2444	5.17711	2.87739e-05	0.00306861
440900	LINC01191	0.748981	4.93395	5.16755	2.94665e-05	0.00311506
9957	HS3ST1	1.3841	6.90028	5.16684	2.95186e-05	0.00311506
11107	PRDM5	-1.15521	6.6743	-5.15631	3.03028e-05	0.00317176
84057	MND1	1.84934	4.89789	5.1542	3.04628e-05	0.00317176
54443	ANLN	1.52632	4.44722	5.15174	3.06496e-05	0.00317176
11234	HPS5	-0.771658	10.1343	-5.15127	3.06854e-05	0.00317176
5918	RARRES1	2.68114	6.97018	5.14491	3.11756e-05	0.00320488
3671	ISLR	2.25101	7.238	5.14301	3.13238e-05	0.00320488
4125	MAN2B1	0.675172	9.18592	5.13959	3.15917e-05	0.00321597
83872	HMCN1	2.12086	5.89457	5.13697	3.17981e-05	0.00322072
7045	TGFBI	1.13727	10.6004	5.13367	3.20612e-05	0.00323113
3684	ITGAM	1.41026	7.46082	5.11714	3.34096e-05	0.00332793
10409	BASP1	1.03498	9.85831	5.11585	3.3517e-05	0.00332793
54504	CPVL	0.859836	9.97285	5.11146	3.38855e-05	0.00334068
5328	PLAU	0.838328	8.68893	5.11038	3.3977e-05	0.00334068
945	CD33	1.3717	6.48868	5.10764	3.42102e-05	0.00334729
1031	CDKN2C	0.749063	6.85195	5.0988	3.49726e-05	0.00340535
388610	TRNP1	1.00323	8.17096	5.09657	3.51671e-05	0.00340783
257019	FRMD3	-0.649313	11.0127	-5.09406	3.53879e-05	0.00341281
54843	SYTL2	1.20938	8.95413	5.0882	3.59087e-05	0.00344587
23682	RAB38	1.15993	7.35886	5.08638	3.60725e-05	0.00344587
29992	PILRA	1.17357	8.33925	5.07825	3.68118e-05	0.0034999
84966	IGSF21	1.40706	5.46152	5.06301	3.82381e-05	0.00358478
8404	SPARCL1	1.18126	10.3416	5.06021	3.85062e-05	0.0035932
6424	SFRP4	3.31681	6.03918	5.05625	3.88885e-05	0.00360014
10435	CDC42EP2	-0.791955	8.95334	-5.05574	3.89378e-05	0.00360014
6036	RNASE2	2.00238	6.18194	5.04069	4.04292e-05	0.00368516
83742	MARVELD1	0.634427	10.5257	5.04029	4.04692e-05	0.00368516
4232	MEST	1.32575	10.0226	5.03411	4.10988e-05	0.00369815
4313	MMP2	0.981919	9.26091	5.02767	4.17645e-05	0.00372716
2769	GNA15	1.31595	5.69042	5.02469	4.20769e-05	0.00372716
83733	SLC25A18	-0.785598	7.68007	-5.02432	4.21159e-05	0.00372716
688	KLF5	1.13218	7.97158	5.02214	4.23457e-05	0.00372716
6274	S100A3	1.23889	5.92652	5.01684	4.291e-05	0.00374256
4323	MMP14	0.868323	7.59956	5.01252	4.3375e-05	0.00374256
112885	PHF21B	-1.19449	8.03249	-5.01228	4.34017e-05	0.00374256
56911	MAP3K7CL	1.43991	7.73036	5.01207	4.34244e-05	0.00374256
9610	RIN1	0.64037	7.4543	5.01184	4.34491e-05	0.00374256
285590	SH3PXD2B	1.09757	6.92075	5.0053	4.41654e-05	0.0037626
27180	SIGLEC9	1.02824	4.67351	5.00429	4.42767e-05	0.0037626
29128	UHRF1	1.64305	5.84411	5.00265	4.44584e-05	0.0037626
8506	CNTNAP1	0.791516	6.33163	5.00124	4.4615e-05	0.0037626
1520	CTSS	0.782298	9.5878	4.99764	4.50184e-05	0.00378079
5350	PLN	1.22744	9.36017	4.98801	4.61146e-05	0.00385678
160428	ALDH1L2	1.20261	5.47747	4.98334	4.66566e-05	0.00388599
55803	ADAP2	0.964438	7.77674	4.9781	4.72712e-05	0.00391737
84631	SLITRK2	-1.26835	5.07519	-4.97683	4.7422e-05	0.00391737
64943	NT5DC2	0.655574	8.13988	4.97456	4.76913e-05	0.00392353
84624	FNDC1	2.0296	7.37005	4.9725	4.79382e-05	0.00392781
339524	LINC01140	1.71564	7.12923	4.96165	4.92559e-05	0.00400315
100287525	LOC100287525	0.692598	6.7582	4.96038	4.94127e-05	0.00400315
220	ALDH1A3	1.81793	7.00065	4.95825	4.9677e-05	0.00400315
57121	LPAR5	1.32723	6.86052	4.94397	5.14834e-05	0.00411785
57705	WDFY4	1.03593	6.15523	4.94004	5.19921e-05	0.00414211
8654	PDE5A	0.888399	8.68749	4.93028	5.32762e-05	0.00421111
284677	C1orf204	-1.14247	8.57381	-4.92504	5.39803e-05	0.0042377
8477	GPR65	0.976561	7.64388	4.92465	5.4033e-05	0.0042377
10859	LILRB1	1.19034	6.4271	4.92281	5.42818e-05	0.00424071
57451	TENM2	-0.980133	9.66705	-4.91902	5.47992e-05	0.00426461
1292	COL6A2	1.25437	7.88958	4.9157	5.52558e-05	0.00427146
23166	STAB1	0.735796	9.11286	4.9153	5.53111e-05	0.00427146
5167	ENPP1	0.995584	8.65817	4.89677	5.79376e-05	0.00445722
1104	RCC1	0.682199	7.19777	4.89313	5.84674e-05	0.00448087
1511	CTSG	2.38959	5.30601	4.89001	5.89266e-05	0.00449896
23397	NCAPH	1.08024	3.33468	4.888	5.92236e-05	0.00450457
405754	ERVFRD-1	-1.44335	6.86192	-4.88386	5.98401e-05	0.00453435
5396	PRRX1	2.81383	6.46277	4.88025	6.03838e-05	0.00455841
3624	INHBA	1.66932	9.20946	4.86478	6.27689e-05	0.00472079
5091	PC	-0.906952	8.76289	-4.85753	6.39195e-05	0.0047617
92610	TIFA	0.64257	9.37333	4.85739	6.39424e-05	0.0047617
10993	SDS	1.43388	5.82394	4.85646	6.40917e-05	0.0047617
57716	PRX	-0.671562	8.18295	-4.85425	6.44464e-05	0.0047617
983	CDK1	0.850576	7.24559	4.85396	6.44941e-05	0.0047617
11098	PRSS23	0.855305	10.4747	4.84962	6.51985e-05	0.00479613
717	C2	1.36133	7.72053	4.83582	6.74923e-05	0.0049324
55208	DCUN1D2	-0.590993	8.62844	-4.83554	6.75404e-05	0.0049324
55247	NEIL3	1.96309	3.85377	4.82895	6.8664e-05	0.00497341
83716	CRISPLD2	1.43527	9.58942	4.82888	6.86766e-05	0.00497341
3875	KRT18	0.930891	10.8595	4.82792	6.88421e-05	0.00497341
10261	IGSF6	1.4832	7.44326	4.81184	7.16729e-05	0.00515942
8091	HMGA2	1.82752	4.54382	4.80298	7.32825e-05	0.00525652
83468	GLT8D2	1.06534	8.9386	4.7991	7.3999e-05	0.00528909
8744	TNFSF9	0.878079	4.95186	4.78812	7.60633e-05	0.0053977
84935	MEDAG	1.59812	6.73925	4.78586	7.64955e-05	0.0053977
9133	CCNB2	1.18913	6.09315	4.78537	7.65897e-05	0.0053977
130120	REG3G	2.43614	5.44316	4.77884	7.78536e-05	0.0054643
53829	P2RY13	1.10958	6.8507	4.7777	7.80769e-05	0.0054643
6356	CCL11	2.1275	6.00577	4.77526	7.85565e-05	0.00547884
155465	AGR3	2.19951	5.03755	4.7697	7.96598e-05	0.0055199
23541	SEC14L2	1.09306	6.37811	4.76953	7.96929e-05	0.0055199
1365	CLDN3	0.695072	6.72482	4.76774	8.00514e-05	0.00552574
128553	TSHZ2	1.08104	8.7613	4.7654	8.05235e-05	0.00553936
169026	SLC30A8	-1.7342	5.24894	-4.76265	8.10805e-05	0.0055587
161145	TMEM229B	-0.636441	8.31924	-4.75488	8.26757e-05	0.00561081
3764	KCNJ8	1.40857	7.70464	4.75231	8.32104e-05	0.00562815
8600	TNFSF11	1.53646	3.23397	4.75064	8.35594e-05	0.00563285
718	C3	2.0215	10.2357	4.74741	8.42399e-05	0.00564099
7378	UPP1	0.589275	8.90225	4.74409	8.4944e-05	0.0056506
1306	COL15A1	1.02385	9.23891	4.74153	8.54903e-05	0.00566823
2681	GGTA1P	1.09549	8.11546	4.73903	8.603e-05	0.00568531
6324	SCN1B	0.85408	6.53053	4.73538	8.68193e-05	0.00571873
10170	DHRS9	1.74056	5.25765	4.72992	8.80173e-05	0.00577875
26301	GBGT1	1.08875	5.18084	4.72438	8.9249e-05	0.00580678
991	CDC20	1.10923	6.40984	4.72184	8.98211e-05	0.00580678
10894	LYVE1	1.66439	7.06553	4.72134	8.99332e-05	0.00580678
387763	C11orf96	0.675293	10.6883	4.72028	9.01728e-05	0.00580678
8877	SPHK1	1.06612	5.26087	4.71405	9.1593e-05	0.00586466
7043	TGFB3	1.18024	7.74041	4.71379	9.16535e-05	0.00586466
9055	PRC1	0.991402	6.89892	4.709	9.27605e-05	0.00591671
7139	TNNT2	-0.96119	11.2519	-4.707	9.32292e-05	0.00592068
64581	CLEC7A	1.12835	8.33976	4.70611	9.34354e-05	0.00592068
84561	SLC12A8	0.946142	6.67589	4.70497	9.37039e-05	0.00592068
8909	ENDOU	-0.946704	5.58607	-4.70235	9.43233e-05	0.00594119
54084	TSPEAR	-1.40032	4.91308	-4.69923	9.50647e-05	0.00596858
10635	RAD51AP1	1.06418	6.09869	4.69696	9.56079e-05	0.00596858
4854	NOTCH3	0.745828	10.5657	4.6968	9.56465e-05	0.00596858
5738	PTGFRN	0.972496	9.31939	4.6789	0.00010004	0.00621892
6504	SLAMF1	1.21948	5.23368	4.67797	0.000100275	0.00621892
313	AOAH	1.05999	7.19058	4.6691	0.000102532	0.00631399
23308	ICOSLG	-0.707418	7.54639	-4.66826	0.000102748	0.00631399
101929454	LOC101929454	-1.66117	5.11645	-4.66278	0.000104173	0.00638208
145864	HAPLN3	1.13941	7.06553	4.65975	0.000104967	0.00639677
131583	FAM43A	-0.842588	9.61586	-4.65944	0.000105047	0.00639677
83461	CDCA3	1.04564	5.49914	4.65628	0.000105885	0.00642837
176	ACAN	1.04394	5.67759	4.65335	0.000106667	0.00645641
1974	EIF4A2	-1.27657	3.04493	-4.64829	0.000108031	0.00648918
8728	ADAM19	0.971881	8.08178	4.64776	0.000108175	0.00648918
10095	ARPC1B	0.617734	9.79696	4.62951	0.000113246	0.00675323
5999	RGS4	1.98762	9.1365	4.62477	0.000114602	0.00681391
90993	CREB3L1	1.6282	6.70667	4.61174	0.000118415	0.00699935
5031	P2RY6	0.80262	6.90898	4.60973	0.000119012	0.00701406
347733	TUBB2B	1.12559	8.29779	4.60498	0.000120442	0.00707425
113452	TMEM54	0.693692	8.29778	4.60401	0.000120735	0.00707425
56062	KLHL4	1.69196	4.45457	4.59769	0.000122668	0.00716484
259266	ASPM	1.42363	5.586	4.59664	0.000122992	0.00716484
2335	FN1	0.940387	11.2557	4.59184	0.000124482	0.00716655
5276	SERPINI2	-1.84789	4.40215	-4.59175	0.000124512	0.00716655
10406	WFDC2	1.38402	10.4986	4.5911	0.000124715	0.00716655
1303	COL12A1	0.67925	9.84119	4.58844	0.000125549	0.00716655
7462	LAT2	1.02445	6.13767	4.58807	0.000125666	0.00716655
55165	CEP55	1.72809	6.61695	4.58795	0.000125706	0.00716655
126393	HSPB6	1.64413	9.19459	4.58744	0.000125866	0.00716655
64092	SAMSN1	1.5502	6.99422	4.58444	0.000126819	0.00720045
55301	OLAH	-1.35163	6.15375	-4.58166	0.000127707	0.00722492
11075	STMN2	2.8409	4.61913	4.57736	0.000129093	0.00722492
388939	C2orf71	-1.57531	6.36157	-4.57592	0.000129563	0.00722492
375295	LINC01116	0.985277	8.69718	4.57549	0.000129702	0.00722492
117583	PARD3B	-0.676583	10.6896	-4.57467	0.000129967	0.00722492
2919	CXCL1	1.73959	8.54426	4.57421	0.000130117	0.00722492
30845	EHD3	-0.879235	11.4496	-4.56474	0.000133251	0.00737861
3207	HOXA11	0.859111	7.2898	4.55737	0.00013574	0.00745809
9891	NUAK1	0.588015	10.2012	4.5572	0.000135797	0.00745809
25790	CFAP45	-1.35259	8.58668	-4.55429	0.000136795	0.00747218
10870	HCST	1.13108	7.86008	4.55139	0.000137795	0.00750649
27147	DENND2A	1.29327	6.18336	4.54827	0.00013888	0.00754516
5577	PRKAR2B	-0.831804	9.20128	-4.54075	0.000141528	0.00758959
9362	CPNE6	-0.854953	4.8535	-4.5399	0.000141831	0.00758959
114990	VASN	-0.738269	9.26662	-4.53851	0.000142327	0.00758959
7433	VIPR1	-1.66733	8.23946	-4.5381	0.000142474	0.00758959
5603	MAPK13	1.12156	6.79488	4.5369	0.000142901	0.00758959
6372	CXCL6	2.25916	7.18374	4.53459	0.000143733	0.00758959
1675	CFD	1.29977	6.68322	4.53446	0.000143783	0.00758959
3689	ITGB2	1.04126	9.52165	4.53383	0.000144009	0.00758959
26191	PTPN22	1.19136	4.59319	4.53101	0.000145033	0.00758959
57124	CD248	0.888772	9.31199	4.53038	0.000145263	0.00758959
8869	ST3GAL5	0.712271	8.30234	4.53029	0.000145297	0.00758959
6423	SFRP2	2.71662	8.15279	4.52542	0.000147084	0.00761427
94274	PPP1R14A	0.817156	9.19843	4.52442	0.000147455	0.00761427
645369	TMEM200C	-0.821272	10.7595	-4.52385	0.000147665	0.00761427
57876	MUC3B	1.01115	4.73475	4.52313	0.000147931	0.00761427
84722	PSRC1	0.976696	6.10134	4.52272	0.000148085	0.00761427
116496	FAM129A	0.587889	10.5835	4.51904	0.00014946	0.00766239
940	CD28	1.86076	5.63119	4.51819	0.000149781	0.00766239
1513	CTSK	1.10359	8.67999	4.51365	0.000151496	0.00770904
169044	COL22A1	1.69862	4.8686	4.51304	0.000151729	0.00770904
222484	LNX2	-0.593725	9.97864	-4.5094	0.000153126	0.00775415
121053	C12orf45	0.670678	7.13208	4.50839	0.000153511	0.00775415
7153	TOP2A	1.92707	6.77677	4.50743	0.000153883	0.00775415
4162	MCAM	0.756026	10.4902	4.5043	0.000155097	0.00779585
9228	DLGAP2	-1.80722	4.54844	-4.50319	0.000155533	0.00779831
26084	ARHGEF26	-0.990718	9.96251	-4.49535	0.000158626	0.00792994
6404	SELPLG	0.809784	7.7446	4.49455	0.000158945	0.00792994
79895	ATP8B4	1.20497	4.79713	4.4909	0.00016041	0.00798303
5791	PTPRE	0.763458	8.43632	4.48993	0.000160801	0.00798303
2213	FCGR2B	1.51558	6.88119	4.48473	0.000162916	0.00804161
283431	GAS2L3	1.12729	7.19985	4.48458	0.000162974	0.00804161
6285	S100B	1.54106	4.77747	4.48359	0.000163381	0.00804161
115749	C12orf56	-1.18807	8.03136	-4.47918	0.000165203	0.00810176
6320	CLEC11A	0.788182	6.65188	4.47718	0.000166034	0.00812278
30835	CD209	1.70314	7.25706	4.47454	0.000167139	0.00815705
11259	FILIP1L	0.90541	9.44903	4.4677	0.000170034	0.00827825
84552	PARD6G	-0.755201	11.0845	-4.46351	0.000171836	0.00834586
942	CD86	1.47486	7.02184	4.46095	0.000172945	0.00837906
64398	MPP5	-0.705742	11.5214	-4.46001	0.000173351	0.00837906
8445	DYRK2	0.58534	8.69587	4.45568	0.00017525	0.00843016
147495	APCDD1	1.4137	7.6158	4.45529	0.00017542	0.00843016
2903	GRIN2A	1.8861	5.39005	4.45474	0.000175663	0.00843016
284217	LAMA1	1.09442	5.65069	4.4442	0.000180378	0.00861542
114757	CYGB	1.03143	7.24347	4.43939	0.00018257	0.00869004
2048	EPHB2	1.95703	6.94239	4.43888	0.000182803	0.00869004
11065	UBE2C	1.22693	6.27609	4.43704	0.000183649	0.00870974
653464	SRGAP2C	-0.915255	10.5413	-4.43385	0.000185129	0.00873879
143188	LOC143188	-1.03761	6.40558	-4.42504	0.000189269	0.00883022
27004	TCL6	-1.29124	6.37825	-4.42456	0.000189497	0.00883022
9956	HS3ST2	2.885	4.90293	4.42415	0.000189695	0.00883022
114794	ELFN2	1.6281	5.85209	4.42194	0.00019075	0.00885136
83999	KREMEN1	-0.610277	8.95088	-4.42098	0.000191209	0.00885136
1545	CYP1B1	0.688379	10.8707	4.41987	0.000191745	0.00885136
5176	SERPINF1	1.64043	8.6564	4.41795	0.000192673	0.00886646
147372	CCBE1	-0.880406	10.2875	-4.41513	0.00019404	0.00890903
152007	GLIPR2	0.907999	8.53971	4.41256	0.000195298	0.00893427
200373	CFAP221	0.943106	7.25391	4.40756	0.000197769	0.0090186
3936	LCP1	0.979451	8.30153	4.40114	0.000200984	0.00914454
5266	PI3	1.41774	5.91291	4.39732	0.000202918	0.00921176
1277	COL1A1	1.43544	11.07	4.39642	0.000203379	0.00921191
1902	LPAR1	1.88952	8.50978	4.39451	0.000204357	0.00923549
10319	LAMC3	1.45586	6.6062	4.39105	0.00020614	0.00929519
9201	DCLK1	1.41375	5.93872	4.38662	0.000208448	0.00935885
348035	MGC40069	-1.99466	5.1476	-4.38457	0.000209526	0.00938491
6886	TAL1	-0.626695	9.15832	-4.38287	0.000210418	0.00940395
100506377	LINC00973	1.93533	3.87533	4.37931	0.00021231	0.00946754
1307	COL16A1	1.2551	7.11688	4.37814	0.000212933	0.00947435
1473	CST5	1.31777	5.34594	4.37547	0.000214368	0.00951716
4233	MET	0.799928	10.3408	4.37064	0.000216987	0.00960207
645638	WFDC21P	1.48636	6.61942	4.37018	0.000217233	0.00960207
9508	ADAMTS3	1.94142	7.42054	4.36144	0.000222055	0.00975107
100505881	MAGI2-AS3	-0.596989	11.2828	-4.35869	0.000223596	0.00978506
84275	SLC25A33	-0.609477	9.27034	-4.3578	0.000224096	0.00978506
8787	RGS9	-0.711775	8.55499	-4.35746	0.000224285	0.00978506
285848	PNPLA1	-1.08679	3.51109	-4.35293	0.000226852	0.00987567
127602	DNAH14	1.01336	4.77201	4.34622	0.000230708	0.0100219
6366	CCL21	2.07389	9.10844	4.34392	0.000232045	0.0100316
64854	USP46	-0.767082	10.2383	-4.34338	0.000232363	0.0100316
8796	SCEL	1.26528	3.09975	4.34327	0.000232426	0.0100316
389136	VGLL3	1.50903	6.53038	4.33958	0.000234586	0.0100326
7869	SEMA3B	-0.779764	10.4256	-4.33909	0.000234876	0.0100326
9787	DLGAP5	1.83557	4.51319	4.33829	0.000235346	0.0100326
56963	RGMA	-0.984757	6.57931	-4.33772	0.000235687	0.0100326
25797	QPCT	0.863371	9.11748	4.3373	0.000235933	0.0100326
165186	FAM179A	-1.03841	7.13245	-4.33189	0.000239162	0.0101245
2863	GPR39	1.85206	7.93731	4.33121	0.000239573	0.0101245
19	ABCA1	0.778024	7.69554	4.32202	0.000245165	0.0102735
100505738	MIR4458HG	-0.816808	7.48727	-4.31573	0.000249064	0.0104052
8406	SRPX	1.57053	7.04132	4.31449	0.000249843	0.0104052
23037	PDZD2	-0.678841	9.32886	-4.31447	0.000249858	0.0104052
4830	NME1	0.649025	9.9609	4.31221	0.000251277	0.0104189
64780	MICAL1	0.694807	8.2477	4.31205	0.000251376	0.0104189
3694	ITGB6	1.6263	9.16281	4.31095	0.000252074	0.0104189
257106	ARHGAP30	1.2328	7.41612	4.31049	0.000252366	0.0104189
971	CD72	0.900387	5.4484	4.30533	0.000255658	0.0104459
10783	NEK6	0.682835	8.36481	4.30477	0.000256016	0.0104459
1515	CTSV	-1.34413	10.5103	-4.30023	0.00025895	0.0105374
4046	LSP1	1.06651	7.79535	4.29965	0.000259325	0.0105374
4015	LOX	-0.868027	10.6458	-4.29883	0.000259861	0.0105374
51279	C1RL	0.67994	8.40884	4.29808	0.000260349	0.0105374
115265	DDIT4L	-0.971104	9.44045	-4.29607	0.000261666	0.0105694
2735	GLI1	1.22198	5.7619	4.28833	0.000266803	0.0107553
80852	GRIP2	-1.45038	6.52729	-4.28685	0.000267799	0.0107738
2207	FCER1G	0.90883	10.5216	4.28606	0.000268329	0.0107738
116372	LYPD1	2.25167	7.85803	4.27882	0.00027325	0.010893
857	CAV1	0.781776	10.0941	4.277	0.000274496	0.0109083
51659	GINS2	1.1408	6.67274	4.27638	0.000274926	0.0109083
79019	CENPM	0.903598	5.21693	4.27456	0.000276185	0.0109367
2687	GGT5	1.17419	8.72919	4.26701	0.000281469	0.0111023
1075	CTSC	1.06077	11.02	4.2621	0.000284957	0.0111914
6891	TAP2	-0.616987	9.29485	-4.26149	0.000285394	0.0111914
128414	NKAIN4	1.48332	7.64568	4.25982	0.000286595	0.0112102
55799	CACNA2D3	1.19411	6.51109	4.25406	0.000290764	0.0112698
1295	COL8A1	1.89708	8.84448	4.25327	0.000291344	0.0112698
5831	PYCR1	0.809844	5.16344	4.25167	0.000292518	0.0112698
3159	HMGA1	1.04948	8.79747	4.25108	0.000292951	0.0112698
151176	FAM132B	1.85347	6.38213	4.2507	0.00029323	0.0112698
79772	MCTP1	1.51016	6.51492	4.25065	0.000293263	0.0112698
10587	TXNRD2	-0.663806	8.41913	-4.24996	0.000293778	0.0112698
5608	MAP2K6	0.875264	7.26613	4.24972	0.000293955	0.0112698
100506119	LINC01503	1.06033	8.39307	4.24418	0.000298066	0.0113421
100506392	SLC16A1-AS1	0.605467	3.92592	4.24415	0.000298086	0.0113421
6581	SLC22A3	0.946233	6.85792	4.24395	0.000298239	0.0113421
55273	TMEM100	1.7908	5.40536	4.24231	0.000299468	0.0113671
59353	TMEM35	0.98354	2.69937	4.24121	0.0003003	0.0113671
152189	CMTM8	-0.779016	8.89441	-4.23298	0.000306564	0.0115282
7473	WNT3	-1.28649	8.6308	-4.23227	0.000307112	0.0115282
2669	GEM	0.906683	8.87194	4.23223	0.000307136	0.0115282
57689	LRRC4C	1.4097	5.41405	4.22539	0.000312453	0.0116981
1589	CYP21A2	1.01513	9.45286	4.22492	0.000312823	0.0116981
135398	C6orf141	1.27125	3.36038	4.22317	0.000314203	0.0117153
55355	HJURP	1.11337	4.87559	4.22286	0.000314447	0.0117153
541565	C8orf58	-0.685487	9.76533	-4.22201	0.000315115	0.0117185
100288198	HMGN3-AS1	-0.679571	8.96573	-4.21955	0.000317069	0.0117436
54897	CASZ1	-0.850041	9.06233	-4.21707	0.000319047	0.0117779
90865	IL33	1.27338	6.96109	4.21576	0.000320097	0.011795
9232	PTTG1	1.20159	7.90663	4.21317	0.000322182	0.0118502
50856	CLEC4A	0.818946	7.13319	4.21094	0.00032399	0.0118607
151056	PLB1	0.597266	3.8296	4.21016	0.000324621	0.0118607
2152	F3	-0.59975	11.6591	-4.20992	0.000324821	0.0118607
3910	LAMA4	0.975496	8.97477	4.20909	0.000325493	0.0118637
9536	PTGES	1.56379	7.90345	4.20342	0.000330157	0.011944
79626	TNFAIP8L2	0.991961	7.48306	4.20282	0.000330658	0.011944
9796	PHYHIP	-1.14266	10.0606	-4.19563	0.000336669	0.012114
6447	SCG5	1.76333	8.2701	4.18976	0.000341662	0.0122319
64333	ARHGAP9	1.07648	7.52885	4.18734	0.000343746	0.0122629
1606	DGKA	0.7735	8.0399	4.18305	0.000347463	0.0123518
51203	NUSAP1	1.18544	7.81625	4.17911	0.000350911	0.0124202
634	CEACAM1	-0.859001	9.94269	-4.17863	0.000351333	0.0124202
1234	CCR5	1.2236	4.9029	4.1774	0.000352415	0.0124202
56704	JPH1	-1.07949	8.04255	-4.17625	0.000353439	0.0124202
2568	GABRP	2.28669	5.1451	4.17595	0.000353701	0.0124202
219833	C11orf45	1.155	5.46024	4.17341	0.000355964	0.0124665
3832	KIF11	0.907177	6.98437	4.17308	0.000356255	0.0124665
114548	NLRP3	0.897141	6.38216	4.17161	0.00035757	0.0124908
9768	KIAA0101	1.11429	7.60452	4.17087	0.000358238	0.0124925
51673	TPPP3	-0.794256	11.5309	-4.16645	0.00036223	0.0125881
27129	HSPB7	1.00931	5.01772	4.16434	0.000364143	0.0125895
26086	GPSM1	-0.670562	9.15928	-4.16106	0.000367155	0.0126719
25903	OLFML2B	1.47249	7.082	4.15784	0.000370132	0.0127528
85407	NKD1	-1.07705	8.61259	-4.15448	0.000373258	0.012798
6532	SLC6A4	-1.57397	6.5985	-4.15254	0.000375074	0.012798
4192	MDK	0.858776	6.96527	4.15247	0.000375141	0.012798
1396	CRIP1	0.596947	11.0031	4.15152	0.000376036	0.012798
5916	RARG	-0.593309	6.31569	-4.15093	0.000376599	0.012798
70	ACTC1	1.3465	5.68787	4.15033	0.000377159	0.012798
80231	CXorf21	0.708028	5.79807	4.14692	0.000380396	0.0128735
51435	SCARA3	1.28897	6.42999	4.14664	0.000380662	0.0128735
112464	PRKCDBP	0.915671	8.39686	4.14551	0.000381745	0.0128885
6357	CCL13	1.91252	7.16183	4.14241	0.000384722	0.0129594
3752	KCND3	-0.795215	10.3514	-4.14199	0.000385129	0.0129594
10673	TNFSF13B	1.03748	7.78636	4.13947	0.000387568	0.0129836
1734	DIO2	1.83133	6.21482	4.13923	0.000387796	0.0129836
29951	PDZRN4	1.4897	4.2233	4.13909	0.000387938	0.0129836
128346	C1orf162	0.89601	8.87318	4.13782	0.000389173	0.0129836
84894	LINGO1	-0.831772	7.75045	-4.13742	0.000389568	0.0129836
860	RUNX2	0.978078	8.47097	4.13661	0.000390357	0.0129836
54716	SLC6A20	1.48945	4.25576	4.13482	0.00039211	0.0130204
340273	ABCB5	2.45411	4.19064	4.13348	0.000393424	0.0130425
55679	LIMS2	-0.778176	8.96508	-4.12949	0.000397377	0.0131519
7298	TYMS	0.740368	9.31796	4.12862	0.000398246	0.0131591
1804	DPP6	-1.08099	11.5917	-4.12711	0.00039976	0.0131776
2846	LPAR4	1.17813	4.1653	4.12675	0.000400115	0.0131776
151887	CCDC80	1.15121	9.68549	4.12323	0.000403662	0.0132623
79822	ARHGAP28	-0.691473	10.9759	-4.1229	0.000404	0.0132623
1770	DNAH9	-0.895496	7.68612	-4.12109	0.000405833	0.0132896
944	TNFSF8	1.48689	5.55989	4.11933	0.000407625	0.0132975
11249	NXPH2	-2.08828	6.84646	-4.11924	0.000407714	0.0132975
5979	RET	1.18092	6.65387	4.11308	0.000414052	0.0134824
85477	SCIN	1.08444	9.03037	4.11239	0.000414776	0.0134843
338773	TMEM119	2.16537	5.66205	4.10946	0.000417831	0.0135617
1063	CENPF	1.31284	5.95234	4.10675	0.000420673	0.013632
84856	LINC00839	-0.866504	11.2523	-4.10579	0.000421683	0.0136428
4542	MYO1F	0.887303	5.93958	4.1032	0.000424432	0.0136878
25878	MXRA5	1.20552	9.11656	4.10048	0.000427335	0.0137427
51196	PLCE1	-0.775401	11.6475	-4.09835	0.000429613	0.0137667
1030	CDKN2B	1.25835	7.52444	4.09601	0.000432141	0.0138258
5743	PTGS2	1.43283	7.52666	4.09453	0.000433746	0.0138463
1741	DLG3	0.594662	8.39427	4.09415	0.000434155	0.0138463
400541	LOC400541	-0.737497	4.22663	-4.09314	0.000435251	0.0138593
6097	RORC	-1.01478	7.41641	-4.09	0.000438687	0.0139247
79981	FRMD1	-1.04219	8.62914	-4.08927	0.000439492	0.0139283
64805	P2RY12	1.27805	3.64045	4.08478	0.000444462	0.0140197
51200	CPA4	1.63852	5.9815	4.08292	0.000446533	0.0140237
55026	TMEM255A	2.0949	4.28582	4.07662	0.00045363	0.0141405
5947	RBP1	0.919118	9.78953	4.0766	0.000453659	0.0141405
117154	DACH2	-1.40774	8.31962	-4.0764	0.000453885	0.0141405
8838	WISP3	-1.36675	9.07615	-4.07582	0.000454548	0.0141405
4288	MKI67	1.06535	5.36395	4.07576	0.000454606	0.0141405
79875	THSD4	0.72334	9.99295	4.07472	0.000455798	0.0141498
5214	PFKP	0.852629	9.95568	4.06012	0.000472756	0.0145925
4001	LMNB1	1.09176	7.04191	4.05785	0.000475454	0.0146533
79836	LONRF3	-0.603505	8.31422	-4.0565	0.000477057	0.014659
730091	LINC00886	-0.988797	7.53215	-4.05624	0.000477376	0.014659
51352	WT1-AS	-1.13354	9.16992	-4.05586	0.000477822	0.014659
8857	FCGBP	1.28342	7.45707	4.05385	0.000480231	0.0146957
50509	COL5A3	1.07283	5.24133	4.0519	0.000482587	0.0147379
7135	TNNI1	-1.35166	10.2701	-4.05007	0.000484797	0.014766
284080	LOC284080	-1.17359	6.49579	-4.04896	0.000486144	0.014766
221711	SYCP2L	-1.17542	5.62624	-4.04791	0.000487423	0.014766
12	SERPINA3	2.68055	6.47118	4.04732	0.00048814	0.014766
10874	NMU	2.4115	6.07769	4.04692	0.000488634	0.014766
26002	MOXD1	1.75913	9.21556	4.04543	0.000490458	0.0147854
4919	ROR1	0.762603	6.46369	4.0452	0.000490742	0.0147854
9145	SYNGR1	0.738812	7.9623	4.0436	0.000492706	0.0148224
4889	NPY5R	1.03979	6.53705	4.0404	0.000496669	0.014875
3912	LAMB1	0.628289	11.0576	4.03568	0.000502562	0.0150289
11314	CD300A	1.08738	7.96352	4.0345	0.000504047	0.0150289
6850	SYK	0.998028	8.42227	4.0327	0.000506324	0.0150746
26577	PCOLCE2	-0.739772	11.8762	-4.03123	0.000508193	0.0151079
84525	HOPX	0.76571	10.3758	4.03064	0.000508944	0.0151079
1302	COL11A2	-1.41484	6.78903	-4.02865	0.000511479	0.0151407
3321	IGSF3	0.708358	8.99922	4.02852	0.000511647	0.0151407
55022	PID1	1.22804	8.42433	4.02801	0.000512301	0.0151407
629	CFB	1.02982	10.2164	4.02453	0.000516778	0.0152506
284276	LINC00908	-0.587238	5.02905	-4.02132	0.00052094	0.015321
10468	FST	1.02487	5.44823	4.02093	0.000521445	0.015321
27190	IL17B	0.717793	5.11952	4.01679	0.000526866	0.0154578
89795	NAV3	1.53927	5.6105	4.01545	0.000528644	0.0154705
10112	KIF20A	1.30864	4.42347	4.01441	0.000530011	0.0154705
53616	ADAM22	0.960089	7.33147	4.01417	0.000530334	0.0154705
23551	RASD2	0.945546	6.12891	4.00976	0.00053621	0.0155556
347689	SOX2-OT	-1.85527	4.96005	-4.00963	0.000536381	0.0155556
10344	CCL26	1.23783	4.45825	4.00938	0.000536718	0.0155556
130940	CCDC148	-0.912048	7.48385	-4.00906	0.000537146	0.0155556
6542	SLC7A2	0.917075	8.40931	4.00164	0.000547209	0.0158243
699	BUB1	1.02234	4.32688	3.99586	0.00055517	0.0160054
1840	DTX1	1.1453	7.25337	3.99459	0.00055693	0.0160054
115727	RASGRP4	0.796607	5.89121	3.99353	0.000558405	0.0160054
441027	TMEM150C	-0.609633	11.7907	-3.99246	0.000559904	0.0160054
716	C1S	0.642706	10.6545	3.99188	0.000560716	0.0160054
29947	DNMT3L	-1.86948	5.85364	-3.99177	0.000560869	0.0160054
1536	CYBB	1.25896	7.70098	3.9911	0.000561802	0.0160054
5880	RAC2	0.825882	9.33372	3.99058	0.000562538	0.0160054
29122	PRSS50	-0.923191	6.1418	-3.99025	0.000563001	0.0160054
54360	CYTL1	1.75025	5.29878	3.98637	0.000568489	0.0160708
4070	TACSTD2	0.993531	10.8787	3.98576	0.000569347	0.0160708
147906	DACT3	0.931786	5.42747	3.98469	0.00057088	0.0160708
767579	SNORD114-3	-0.994293	2.68674	-3.98293	0.000573391	0.0161189
4815	NINJ2	1.09059	6.58052	3.97774	0.000580872	0.0162612
1740	DLG2	-0.949702	9.77957	-3.97383	0.000586566	0.0163751
332	BIRC5	1.41682	7.60457	3.97294	0.000587879	0.0163891
4751	NEK2	0.969056	3.64984	3.97161	0.00058983	0.0164125
151295	SLC23A3	-1.81393	8.38043	-3.97073	0.000591128	0.0164125
574036	SERTAD4-AS1	1.01924	7.92868	3.97071	0.000591161	0.0164125
8828	NRP2	1.01031	7.26053	3.96766	0.000595685	0.0165145
55287	TMEM40	-0.888489	5.6983	-3.96708	0.000596536	0.0165145
951	CD37	1.35165	6.28143	3.96657	0.000597296	0.0165145
85446	ZFHX2	-0.736811	7.73416	-3.96486	0.000599854	0.0165399
3587	IL10RA	0.93968	8.06437	3.96304	0.000602595	0.0165738
133522	PPARGC1B	-0.643359	7.02397	-3.96289	0.000602809	0.0165738
57333	RCN3	0.752904	7.70645	3.96149	0.000604927	0.016589
440603	BCL2L15	1.3096	4.5546	3.95839	0.000609622	0.0166595
3082	HGF	1.49285	7.23044	3.95769	0.000610695	0.0166595
3037	HAS2	0.968575	4.10677	3.95762	0.000610804	0.0166595
84133	ZNRF3	-0.724331	9.97715	-3.95684	0.000611983	0.0166691
3899	AFF3	1.00278	7.83722	3.9535	0.000617117	0.0166961
23255	MTCL1	0.977238	7.14197	3.95019	0.000622232	0.0168119
79908	BTNL8	-1.4838	5.86669	-3.9489	0.000624233	0.0168267
137835	TMEM71	0.982052	5.56603	3.94851	0.000624842	0.0168267
4693	NDP	0.993518	4.72089	3.94821	0.000625318	0.0168267
90293	KLHL13	1.17475	8.52388	3.94599	0.00062878	0.016873
8092	ALX1	1.10956	4.92083	3.94499	0.000630353	0.016873
54210	TREM1	1.43439	5.52081	3.93851	0.000640638	0.0171029
1002	CDH4	1.2198	4.39535	3.93684	0.000643309	0.0171515
3003	GZMK	1.24306	7.28444	3.9334	0.000648855	0.0172437
4921	DDR2	0.689189	9.30398	3.92951	0.000655172	0.0173759
3679	ITGA7	0.726379	8.00215	3.92521	0.000662252	0.0175405
1464	CSPG4	0.807201	8.03252	3.92346	0.000665147	0.01758
56603	CYP26B1	-1.8173	7.83179	-3.92221	0.000667212	0.0175915
84978	FRMD5	1.34765	4.45896	3.9209	0.000669409	0.0175915
3880	KRT19	1.52986	10.7718	3.92089	0.000669412	0.0175915
100507524	ARHGEF26-AS1	-1.24486	5.45299	-3.9184	0.000673589	0.0176552
151473	SLC16A14	1.36914	6.6406	3.91471	0.000679815	0.0177591
92949	ADAMTSL1	1.3773	6.77782	3.91431	0.000680488	0.0177591
4239	MFAP4	1.48589	8.38808	3.91396	0.000681078	0.0177591
91752	ZNF804A	-1.75528	7.7005	-3.91247	0.00068363	0.0178026
715	C1R	0.628814	11.1429	3.91044	0.000687098	0.0178675
10148	EBI3	0.972452	6.59389	3.90994	0.000687953	0.0178675
58484	NLRC4	0.969901	6.36205	3.90945	0.000688781	0.0178675
1183	CLCN4	-0.695639	9.03885	-3.90716	0.000692723	0.0179237
158314	LINC00475	0.635095	6.23181	3.9058	0.000695082	0.0179616
4741	NEFM	1.71012	5.5191	3.90087	0.000703671	0.0180992
23547	LILRA4	0.935711	5.01268	3.90018	0.000704895	0.0180992
202333	CMYA5	-1.07299	9.36468	-3.89798	0.000708768	0.0181755
1215	CMA1	1.2548	3.51294	3.8959	0.000712442	0.0182465
57402	S100A14	1.07173	5.48032	3.89157	0.000720174	0.0183846
2736	GLI2	0.752647	5.72883	3.89003	0.00072294	0.0184217
140766	ADAMTS14	0.608264	3.90817	3.88748	0.000727559	0.018516
152195	NUDT16P1	-0.639688	6.85646	-3.88658	0.000729187	0.0185294
1301	COL11A1	1.77543	6.65497	3.88403	0.000733841	0.0185294
9863	MAGI2	-0.743081	11.029	-3.88399	0.000733904	0.0185294
9263	STK17A	0.642194	8.26598	3.88391	0.000734046	0.0185294
27295	PDLIM3	0.718672	7.66267	3.88315	0.00073545	0.0185297
147841	SPC24	0.876573	4.68278	3.88214	0.000737288	0.0185528
9076	CLDN1	1.17948	10.768	3.88102	0.000739363	0.018577
57458	TMCC3	-0.775981	10.8612	-3.87875	0.000743555	0.0186407
259173	ALS2CL	-0.894985	11.0057	-3.87792	0.000745084	0.0186431
728215	FAM155A	1.20156	7.25297	3.87419	0.000752036	0.01876
11004	KIF2C	0.875864	4.61283	3.8727	0.000754836	0.0187833
9447	AIM2	1.14962	4.87995	3.87097	0.000758103	0.0188413
125113	KRT222	1.734	6.28305	3.86816	0.00076341	0.0189499
2357	FPR1	0.840832	7.77885	3.86643	0.000766716	0.0190085
10630	PDPN	-0.798134	10.2275	-3.86387	0.000771608	0.0190595
306	ANXA3	1.17028	9.2865	3.86255	0.000774156	0.019099
2533	FYB	0.888879	8.19067	3.86133	0.000776518	0.0191339
143379	C10orf82	-1.57691	8.55664	-3.85657	0.00078576	0.0193141
120425	AMICA1	1.02041	8.07564	3.85583	0.000787207	0.0193141
409	ARRB2	0.673615	7.19313	3.85468	0.000789466	0.0193141
51339	DACT1	1.10968	7.86633	3.85462	0.000789583	0.0193141
5788	PTPRC	0.734454	9.49629	3.84308	0.000812594	0.0196859
221981	THSD7A	-0.753674	11.2087	-3.84069	0.000817432	0.0197793
221662	RBM24	1.40387	5.04389	3.83766	0.000823627	0.0198649
54361	WNT4	0.759525	4.60819	3.83746	0.000824039	0.0198649
55289	ACOXL	-0.594808	3.92323	-3.83624	0.000826529	0.0198801
1438	CSF2RA	1.08538	6.10949	3.83492	0.000829248	0.0199217
83643	CCDC3	1.88435	8.3268	3.83331	0.000832588	0.0199621
5731	PTGER1	0.611035	6.31033	3.8263	0.000847222	0.0201613
57188	ADAMTSL3	1.67535	5.42385	3.8219	0.000856545	0.0202869
6688	SPI1	0.745332	6.81023	3.82106	0.000858328	0.0202869
5806	PTX3	1.7077	6.13792	3.8208	0.000858894	0.0202869
2331	FMOD	1.4258	7.39793	3.82078	0.000858921	0.0202869
81539	SLC38A1	0.98042	9.35489	3.82043	0.000859684	0.0202869
54986	ULK4	-0.86125	7.31037	-3.81985	0.000860915	0.0202869
2042	EPHA3	1.40453	7.89368	3.81955	0.00086156	0.0202869
80183	KIAA0226L	1.15411	6.7462	3.81504	0.000871278	0.0204203
58529	MYOZ1	-1.01445	7.32463	-3.81369	0.000874199	0.020465
51207	DUSP13	-0.733399	4.31888	-3.80961	0.000883102	0.0206085
10551	AGR2	2.1962	7.48744	3.80948	0.000883395	0.0206085
3269	HRH1	1.41945	8.62586	3.80661	0.000889709	0.0207113
58475	MS4A7	1.13798	8.63052	3.80516	0.000892939	0.0207113
9242	MSC	1.07839	5.87887	3.80196	0.000900066	0.0208286
81553	FAM49A	0.885444	6.19639	3.80123	0.00090168	0.0208323
79365	BHLHE41	1.15821	8.50508	3.80006	0.000904324	0.0208323
79172	CENPO	0.620711	8.57128	3.80002	0.00090441	0.0208323
5157	PDGFRL	0.990258	6.46527	3.79965	0.000905231	0.0208323
131034	CPNE4	-1.48893	6.56954	-3.79948	0.000905615	0.0208323
5739	PTGIR	0.958459	6.09253	3.79768	0.000909685	0.0208747
3603	IL16	0.644691	7.98553	3.79739	0.000910343	0.0208747
7454	WAS	0.830947	7.07272	3.79497	0.000915813	0.0209763
4773	NFATC2	0.7457	8.90919	3.79354	0.000919076	0.0210271
911	CD1C	1.61923	6.98873	3.79284	0.000920684	0.02104
126014	OSCAR	1.09462	6.34607	3.78979	0.000927688	0.0211282
55315	SLC29A3	0.716736	7.80992	3.78901	0.000929477	0.0211451
645682	POU5F1P4	0.624422	4.68829	3.78533	0.000938003	0.0213136
100192386	FLJ16779	1.41457	3.9956	3.78453	0.000939865	0.0213136
51514	DTL	1.71481	5.28563	3.78172	0.000946445	0.0214343
3486	IGFBP3	1.1968	10.1068	3.78075	0.000948733	0.021437
4254	KITLG	0.718082	9.55664	3.78069	0.00094888	0.021437
92521	SPECC1	0.787258	7.92028	3.77996	0.000950607	0.021437
3070	HELLS	0.840612	5.88954	3.77897	0.000952944	0.021437
10990	LILRB5	1.26991	5.95288	3.77837	0.000954354	0.0214432
80032	ZNF556	0.634895	4.27683	3.77795	0.00095535	0.0214432
9244	CRLF1	0.790578	5.119	3.77743	0.000956575	0.0214469
151790	WDR49	-1.87348	6.06693	-3.77684	0.000957986	0.0214546
2199	FBLN2	1.41996	6.52501	3.77529	0.000961686	0.0214574
55357	TBC1D2	0.59736	6.81169	3.77456	0.000963435	0.0214574
202309	GAPT	1.3074	3.62761	3.77385	0.000965129	0.0214715
10981	RAB32	0.653372	8.1536	3.77143	0.000970934	0.0215768
266675	BEST4	0.715393	5.16953	3.76829	0.000978529	0.0216501
10272	FSTL3	1.22056	7.76629	3.76738	0.000980757	0.0216756
83729	INHBE	1.06708	4.53603	3.7618	0.000994414	0.0218984
100505538	RBM26-AS1	-0.886897	6.95664	-3.76167	0.000994742	0.0218984
9920	KBTBD11	-0.661236	10.9266	-3.75998	0.000998912	0.0219565
25907	TMEM158	1.04787	5.17206	3.75842	0.0010028	0.0220179
51314	NME8	1.33473	4.03424	3.75598	0.00100887	0.022127
3606	IL18	1.12586	7.74059	3.75356	0.00101494	0.022236
79801	SHCBP1	1.16505	4.12464	3.74667	0.00103243	0.0225702
3763	KCNJ6	1.44583	3.65239	3.74228	0.00104374	0.0227434
54518	APBB1IP	1.04484	6.80132	3.73928	0.00105153	0.0228883
5890	RAD51B	0.799697	5.85712	3.73848	0.00105361	0.0229089
1001	CDH3	1.13337	6.49576	3.73237	0.00106969	0.0231836
4360	MRC1	0.965684	9.66502	3.73146	0.00107211	0.0232109
54440	SASH3	0.807701	8.62467	3.7251	0.00108913	0.0234535
5136	PDE1A	0.879828	10.4912	3.72159	0.00109864	0.0236079
10418	SPON1	1.44821	8.61455	3.72097	0.00110034	0.0236192
1759	DNM1	0.761708	8.53444	3.71813	0.00110809	0.0237603
3691	ITGB4	0.761293	6.45959	3.71718	0.0011107	0.0237744
79608	RIC3	-0.817675	5.3571	-3.71615	0.00111355	0.0238015
1380	CR2	-0.978722	6.19624	-3.71466	0.00111765	0.0238593
116535	MRGPRF	-0.656551	9.84981	-3.71431	0.00111863	0.0238593
22974	TPX2	1.38004	5.04706	3.71016	0.00113017	0.0240737
1366	CLDN7	0.911152	7.87201	3.70984	0.00113107	0.0240737
4069	LYZ	0.631534	11.2803	3.70934	0.00113246	0.024078
157381	LINC00964	-1.40346	5.05068	-3.70827	0.00113549	0.0241169
1116	CHI3L1	-0.933777	11.8426	-3.70691	0.00113931	0.0241443
5382	PMS2P4	-0.717793	6.67714	-3.70355	0.00114883	0.0242293
9770	RASSF2	0.664501	9.01635	3.70204	0.00115313	0.0242869
140628	GATA5	-0.820664	8.76362	-3.70063	0.00115717	0.0242957
23086	EXPH5	-0.806974	10.3647	-3.699	0.00116184	0.0243431
5865	RAB3B	1.62092	6.0994	3.69811	0.00116439	0.0243713
51330	TNFRSF12A	0.890006	8.59421	3.69733	0.00116663	0.0243927
3667	IRS1	0.60143	8.89444	3.69396	0.00117642	0.0245466
1880	GPR183	1.17205	6.72774	3.69218	0.00118161	0.0246293
25802	LMOD1	1.08302	6.98211	3.69019	0.00118742	0.0247249
9051	PSTPIP1	0.868832	5.75825	3.68539	0.00120162	0.0248479
79930	DOK3	0.832822	7.26771	3.68528	0.00120194	0.0248479
27294	DHDH	-1.49707	7.2035	-3.68503	0.00120267	0.0248479
5593	PRKG2	-1.42068	4.80598	-3.68221	0.00121111	0.0249347
3357	HTR2B	0.868515	8.54482	3.68028	0.00121689	0.0250046
114036	LINC00310	1.02925	3.97815	3.67994	0.00121792	0.0250046
100289187	GS1-259H13.2	-0.62398	7.18925	-3.67984	0.00121822	0.0250046
167681	PRSS35	1.18015	5.58536	3.67914	0.00122034	0.0250092
173	AFM	-2.50415	8.10135	-3.67894	0.00122093	0.0250092
56256	SERTAD4	1.14878	7.90447	3.67379	0.00123657	0.0252526
783	CACNB2	-0.916696	9.54888	-3.67053	0.00124659	0.0253288
157285	SGK223	0.743046	8.18486	3.66973	0.00124906	0.0253478
6363	CCL19	2.40784	7.39469	3.66568	0.00126161	0.0255312
338799	LINC01089	-0.588905	7.13143	-3.66168	0.00127413	0.0257585
7272	TTK	1.00558	3.59165	3.66085	0.00127677	0.0257861
51311	TLR8	1.05722	6.48752	3.65906	0.00128241	0.0258128
3783	KCNN4	1.17216	5.42093	3.65888	0.00128297	0.0258128
285382	C3orf70	-0.723007	9.44136	-3.65881	0.00128321	0.0258128
2305	FOXM1	0.852623	6.45489	3.65753	0.00128726	0.0258426
157	ADRBK2	-0.672053	9.50854	-3.65478	0.00129605	0.0259932
132430	PABPC4L	0.673101	7.38564	3.65307	0.00130152	0.0260634
90362	FAM110B	0.875515	9.06747	3.65263	0.00130295	0.0260634
3791	KDR	-0.682684	10.7262	-3.65182	0.00130555	0.0260634
51085	MLXIPL	-0.998812	6.12539	-3.65168	0.00130601	0.0260634
6362	CCL18	3.62707	6.69225	3.65078	0.00130889	0.026095
57405	SPC25	1.30133	3.94015	3.65035	0.0013103	0.0260973
3075	CFH	1.08556	9.94729	3.64871	0.00131562	0.0261772
3067	HDC	1.67106	3.74632	3.64808	0.00131765	0.0261919
79703	C11orf80	0.640472	6.69717	3.64668	0.00132221	0.0262308
10626	TRIM16	0.673549	7.7398	3.64479	0.0013284	0.0263277
10848	PPP1R13L	0.785037	7.46609	3.64168	0.00133865	0.0265047
7134	TNNC1	-0.855631	11.0533	-3.64088	0.00134129	0.026531
58504	ARHGAP22	1.10434	5.97594	3.63862	0.00134879	0.0265751
1378	CR1	-0.955388	10.919	-3.63862	0.0013488	0.0265751
100129858	SCOC-AS1	-0.995409	5.18845	-3.63558	0.00135894	0.0267227
163589	TDRD5	-1.09811	4.92731	-3.62815	0.00138408	0.027164
57817	HAMP	1.06366	5.34994	3.62734	0.00138684	0.0271772
284439	SLC25A42	-0.594091	9.43106	-3.62685	0.00138853	0.0271772
27287	VENTX	0.793962	5.45472	3.62677	0.00138879	0.0271772
7083	TK1	0.619182	6.6318	3.62597	0.00139155	0.0271784
729230	CCR2	1.45034	6.77748	3.62472	0.00139585	0.0271784
1364	CLDN4	1.03486	7.63733	3.62471	0.00139587	0.0271784
4085	MAD2L1	0.695548	7.73947	3.6244	0.00139697	0.0271784
23627	PRND	1.46944	4.97525	3.62433	0.00139719	0.0271784
1441	CSF3R	0.740343	6.15506	3.62406	0.00139812	0.0271784
386618	KCTD4	1.00889	4.59144	3.62344	0.00140027	0.0271784
4188	MDFI	0.782211	5.47976	3.62302	0.00140171	0.0271784
54974	THG1L	0.714425	7.04161	3.62295	0.00140196	0.0271784
170371	C10orf128	1.18044	7.66631	3.62284	0.00140234	0.0271784
22801	ITGA11	1.26156	7.12323	3.62235	0.00140402	0.0271849
26011	TENM4	1.47279	6.36904	3.6219	0.00140558	0.0271889
56938	ARNTL2	1.21679	5.93693	3.62088	0.00140912	0.0272313
9212	AURKB	0.798965	5.78267	3.61966	0.00141336	0.0272871
1029	CDKN2A	1.47145	6.12772	3.61838	0.00141786	0.0273477
132671	SPATA18	-0.639079	9.23284	-3.61667	0.00142384	0.0274368
100507410	C1QTNF1-AS1	-0.729684	5.33365	-3.61584	0.00142675	0.0274667
79901	CYBRD1	0.718168	9.98251	3.61428	0.00143224	0.0274673
350	APOH	-2.13566	8.28489	-3.61331	0.00143567	0.0274808
24147	FJX1	0.723404	7.32096	3.61147	0.0014422	0.0275275
54913	RPP25	0.623183	6.99003	3.60635	0.00146053	0.0278065
23657	SLC7A11	1.33678	5.02777	3.60504	0.00146524	0.0278429
6402	SELL	0.888525	8.07229	3.60493	0.00146563	0.0278429
4609	MYC	0.966064	6.24752	3.60114	0.00147938	0.0280224
26051	PPP1R16B	-0.588161	8.75907	-3.6004	0.0014821	0.0280236
146691	TOM1L2	-0.64945	9.72925	-3.59969	0.00148467	0.0280311
29028	ATAD2	0.624155	6.37358	3.59953	0.00148528	0.0280311
54715	RBFOX1	-0.81562	6.47674	-3.5989	0.00148758	0.0280482
387103	CENPW	1.02872	7.39255	3.59602	0.00149818	0.0281166
84620	ST6GAL2	1.03878	3.88512	3.59333	0.0015081	0.0281912
7125	TNNC2	-0.619126	5.17244	-3.5933	0.00150822	0.0281912
6508	SLC4A3	0.612756	5.47388	3.59207	0.00151279	0.0281912
117247	SLC16A10	-0.753634	8.42214	-3.59204	0.00151293	0.0281912
130367	SGPP2	1.21654	6.47921	3.59122	0.00151596	0.0281912
7042	TGFB2	0.707117	10.5106	3.59118	0.00151614	0.0281912
220134	SKA1	0.636958	2.77825	3.58985	0.00152109	0.0282572
3798	KIF5A	1.18522	5.62674	3.58867	0.00152553	0.0283135
85358	SHANK3	-0.657474	9.219	-3.58661	0.00153329	0.0283916
970	CD70	0.939523	4.97062	3.58569	0.00153676	0.0284173
100507027	LINC00948	-2.41843	5.75987	-3.58281	0.00154767	0.028593
9245	GCNT3	1.25722	5.4875	3.57953	0.00156021	0.0287336
146722	CD300LF	1.15705	6.26451	3.57933	0.00156099	0.0287336
4318	MMP9	1.35431	5.64995	3.57694	0.0015702	0.0287979
883	CCBL1	-0.686164	8.06757	-3.57609	0.00157349	0.0288321
1026	CDKN1A	0.58501	10.4022	3.57469	0.00157891	0.0288895
116443	GRIN3A	-1.25064	4.76627	-3.57454	0.00157949	0.0288895
64067	NPAS3	-0.870067	9.03645	-3.57162	0.00159089	0.0290189
123591	C15orf27	-1.01234	9.57071	-3.56959	0.00159887	0.0291119
9837	GINS1	0.985115	7.27896	3.56879	0.00160201	0.0291206
5581	PRKCE	-0.637617	8.03891	-3.56873	0.00160224	0.0291206
101928153	ITGA9-AS1	-0.803238	5.6257	-3.56793	0.00160538	0.0291515
23533	PIK3R5	0.936424	6.54207	3.56717	0.00160839	0.0291797
727944	LOC727944	-1.40919	5.93044	-3.56621	0.00161219	0.0291961
399959	MIR100HG	0.754673	9.39685	3.56502	0.00161691	0.029235
946	SIGLEC6	0.657035	2.89909	3.56458	0.00161868	0.029235
4316	MMP7	1.48499	10.3892	3.5639	0.0016214	0.0292577
25816	TNFAIP8	0.715773	9.29556	3.56235	0.00162758	0.0293169
286367	LOC286367	-0.632133	7.55503	-3.56088	0.00163348	0.029392
2162	F13A1	0.834789	8.91378	3.56058	0.00163467	0.029392
24137	KIF4A	1.19508	5.48838	3.55975	0.00163802	0.029426
1356	CP	1.4451	7.82638	3.55755	0.00164689	0.029559
124460	SNX20	0.858511	7.31495	3.55533	0.00165592	0.029625
4057	LTF	1.97589	9.2982	3.55527	0.00165616	0.029625
100216479	FAR2P2	-0.684595	8.37376	-3.55474	0.00165832	0.029625
124222	PAQR4	0.616929	6.22125	3.55455	0.0016591	0.029625
22996	TTC39A	0.890746	7.3501	3.5543	0.0016601	0.029625
2571	GAD1	-1.11452	4.92245	-3.55221	0.00166865	0.0297114
4237	MFAP2	1.08414	7.24967	3.55087	0.00167415	0.0297831
29760	BLNK	1.06232	8.66441	3.54779	0.00168688	0.0299058
100616668	TPTE2P5	-0.787939	6.98017	-3.54779	0.00168688	0.0299058
1894	ECT2	0.65592	8.27178	3.54746	0.00168824	0.0299058
912	CD1D	0.853373	6.37726	3.54741	0.00168847	0.0299058
4091	SMAD6	-0.63885	10.4231	-3.54127	0.00171412	0.0302538
3576	CXCL8	1.50298	8.025	3.53909	0.00172332	0.030363
100507073	LOC100507073	1.19507	5.78151	3.53761	0.00172956	0.0304397
100132891	LOC100132891	1.25837	7.3448	3.53717	0.00173144	0.0304397
677779	LINC00488	0.96429	3.4514	3.53683	0.00173288	0.0304397
6662	SOX9	1.18529	8.91385	3.53353	0.00174698	0.0306351
283270	LOC283270	-0.650507	5.85216	-3.53242	0.00175177	0.0306765
144501	KRT80	1.08826	6.34125	3.52958	0.00176402	0.0308642
54769	DIRAS2	1.64444	5.65423	3.52845	0.00176891	0.0308961
387597	ILDR2	-0.615435	10.3412	-3.52711	0.00177472	0.0309708
6943	TCF21	-0.765618	11.8398	-3.52609	0.00177919	0.0310219
4635	MYL4	-0.640391	7.21809	-3.52568	0.001781	0.0310266
3553	IL1B	0.992936	6.62305	3.52531	0.0017826	0.0310277
84059	GPR98	-1.27021	7.14664	-3.52394	0.00178859	0.03103
101927813	HMMR-AS1	0.613455	2.72705	3.52244	0.00179521	0.0310862
128239	IQGAP3	1.63575	6.19146	3.51953	0.00180804	0.031242
3856	KRT8	0.991565	8.92973	3.51935	0.00180886	0.031242
1821	DRP2	0.88061	3.16627	3.51791	0.00181525	0.0312987
2177	FANCD2	0.802627	7.06375	3.51694	0.00181958	0.0313466
56971	CEACAM19	-0.752924	7.59907	-3.51654	0.00182136	0.0313504
64098	PARVG	1.02557	7.52229	3.51359	0.0018346	0.0314922
4035	LRP1	0.617329	9.30854	3.51319	0.0018364	0.0314922
7088	TLE1	0.652006	9.75214	3.5127	0.00183858	0.0314922
72	ACTG2	1.08299	4.38894	3.51262	0.00183897	0.0314922
9023	CH25H	1.70415	5.92788	3.51196	0.00184194	0.0315162
6579	SLCO1A2	1.62987	3.63576	3.51025	0.00184968	0.0316219
5996	RGS1	1.10543	6.17097	3.50812	0.00185937	0.0317605
9865	TRIL	0.734291	8.38053	3.50531	0.00187222	0.031899
7252	TSHB	-0.985661	6.5705	-3.50467	0.00187514	0.0319217
3116	HLA-DPB2	1.2396	3.508	3.50281	0.0018837	0.0319715
3310	HSPA6	1.07437	7.15203	3.50195	0.00188768	0.0319908
9388	LIPG	1.43989	5.67647	3.50053	0.0018943	0.0320229
3732	CD82	0.677876	7.92719	3.49995	0.00189697	0.0320229
91947	ARRDC4	-0.591198	11.3714	-3.49686	0.00191136	0.0321859
27306	HPGDS	1.70172	5.5649	3.49638	0.00191364	0.0321859
7262	PHLDA2	0.687414	5.79353	3.49617	0.00191461	0.0321859
5294	PIK3CG	0.974234	6.62061	3.49397	0.00192496	0.0323329
9700	ESPL1	-0.785841	6.14811	-3.49276	0.00193068	0.0324019
11245	GPR176	0.801738	9.13617	3.49094	0.00193932	0.0325199
213	ALB	-2.90348	9.10904	-3.48797	0.00195347	0.0326432
148229	ATP8B3	0.614986	8.37896	3.48632	0.00196137	0.0326432
4862	NPAS2	0.662498	7.75351	3.48632	0.00196139	0.0326432
84913	ATOH8	-0.789063	9.13779	-3.48617	0.00196211	0.0326432
81706	PPP1R14C	1.0955	8.26816	3.4861	0.00196243	0.0326432
11309	SLCO2B1	0.993526	8.16576	3.48601	0.00196287	0.0326432
81624	DIAPH3	0.911869	7.36516	3.48399	0.00197259	0.0327488
891	CCNB1	0.711751	7.62661	3.48351	0.0019749	0.0327488
1474	CST6	1.32088	7.0839	3.48014	0.00199129	0.0329343
153218	SPINK13	0.801946	3.00316	3.48003	0.00199181	0.0329343
6003	RGS13	1.18424	3.22971	3.47724	0.00200548	0.0330118
259307	IL4I1	0.874776	5.99569	3.47634	0.00200989	0.0330166
153328	SLC25A48	-1.21986	5.59274	-3.47506	0.0020162	0.0330933
79864	C11orf63	-0.592512	7.52094	-3.4739	0.00202192	0.0331601
220965	FAM13C	1.0159	7.88978	3.47342	0.00202426	0.0331716
89932	PAPLN	0.589992	10.7885	3.47131	0.00203477	0.0333167
55536	CDCA7L	0.952699	9.04212	3.46565	0.00206314	0.0336499
340075	ARSI	0.950654	4.72596	3.46486	0.00206712	0.033655
8309	ACOX2	-0.74532	9.15461	-3.46311	0.00207598	0.0336948
8526	DGKE	-0.668734	8.61906	-3.46306	0.00207625	0.0336948
6355	CCL8	1.35442	8.44398	3.46165	0.00208341	0.0337565
2306	FOXD2	-0.775041	6.71845	-3.45737	0.00210534	0.0340571
11151	CORO1A	0.85213	8.47827	3.45479	0.00211862	0.0342171
5493	PPL	0.972541	8.31825	3.45199	0.00213321	0.0343976
79192	IRX1	0.943352	6.6296	3.4494	0.00214671	0.03456
8714	ABCC3	1.26316	8.29822	3.44379	0.00217637	0.0349258
5778	PTPN7	-0.747903	8.79502	-3.4433	0.00217896	0.0349396
1999	ELF3	1.09025	8.55659	3.44232	0.00218416	0.0349605
57513	CASKIN2	-0.604033	9.55431	-3.44208	0.00218547	0.0349605
285	ANGPT2	0.972722	7.11637	3.44063	0.00219322	0.0350568
22795	NID2	0.661022	10.1069	3.4374	0.00221055	0.0352778
80164	PRR36	0.709242	4.77245	3.4362	0.00221704	0.0353534
401190	RGS7BP	0.842198	5.31107	3.43526	0.00222215	0.0354068
8842	PROM1	0.954234	11.1814	3.43402	0.00222889	0.035476
10871	CD300C	0.637547	4.8644	3.43226	0.00223848	0.0355315
503693	LOH12CR2	-0.623444	6.54966	-3.43169	0.00224162	0.0355315
10855	HPSE	1.09952	5.71315	3.43157	0.00224226	0.0355315
10024	TROAP	0.711533	5.33899	3.43156	0.00224231	0.0355315
3934	LCN2	2.46767	6.14368	3.42992	0.00225133	0.0355823
10516	FBLN5	0.860338	8.99727	3.42985	0.0022517	0.0355823
8416	ANXA9	-0.720672	8.30279	-3.42969	0.00225258	0.0355823
54551	MAGEL2	-0.774115	6.78988	-3.42482	0.00227947	0.0359225
2118	ETV4	0.848191	5.66023	3.42037	0.00230437	0.0362866
7301	TYRO3	-0.868759	9.70988	-3.41845	0.00231518	0.0364
728040	LOC728040	-1.13982	3.24879	-3.41727	0.00232186	0.0364655
23649	POLA2	-0.861226	8.79415	-3.41707	0.00232297	0.0364655
400793	C1orf226	-0.68418	8.4508	-3.41476	0.00233611	0.0365864
4868	NPHS1	-0.976179	11.358	-3.40919	0.00236807	0.0370006
7018	TF	-0.724552	5.61406	-3.4075	0.00237781	0.0370953
7409	VAV1	0.793631	6.29981	3.40269	0.00240582	0.0373871
5967	REG1A	2.85559	7.16805	3.40259	0.0024064	0.0373871
79852	EPHX3	0.672377	4.69248	3.40238	0.00240764	0.0373871
8483	CILP	0.91673	5.95872	3.40163	0.00241208	0.0374272
127733	UBXN10	0.661039	6.45183	3.40072	0.00241742	0.0374524
1004	CDH6	1.06949	10.7558	3.40006	0.00242129	0.0374835
170692	ADAMTS18	1.40237	4.81162	3.3985	0.00243054	0.0375259
143187	VTI1A	-0.659177	10.7818	-3.39812	0.00243276	0.0375259
100505576	LINC00672	0.826167	6.97936	3.39796	0.00243374	0.0375259
2700	GJA3	-0.849782	10.2427	-3.39584	0.0024463	0.0375747
3908	LAMA2	0.856401	8.09242	3.39194	0.00246966	0.0378543
9229	DLGAP1	1.37865	6.21729	3.38586	0.00250647	0.0380539
2151	F2RL2	1.23469	8.35125	3.38575	0.00250714	0.0380539
91683	SYT12	1.13478	6.47645	3.38481	0.00251289	0.0380539
113130	CDCA5	0.784591	6.48631	3.38285	0.00252493	0.038119
4312	MMP1	1.2055	5.79531	3.38278	0.00252534	0.038119
7100	TLR5	0.858122	6.43274	3.38192	0.00253061	0.0381309
11226	GALNT6	1.03113	6.29307	3.37921	0.00254733	0.0383165
84152	PPP1R1B	1.62847	6.67067	3.37835	0.00255267	0.0383396
257169	C9orf43	-0.765345	3.47255	-3.37635	0.00256514	0.0384408
53354	PANK1	-0.617152	9.80412	-3.36961	0.00260755	0.0389021
55423	SIRPG	1.10195	4.41767	3.36931	0.00260943	0.0389021
125488	TTC39C	0.925787	7.83512	3.36832	0.00261571	0.0389382
5570	PKIB	0.939273	6.40553	3.36646	0.00262754	0.0390566
11035	RIPK3	0.719906	6.14774	3.36586	0.00263143	0.0390855
146330	FBXL16	0.924042	6.45253	3.36176	0.00265774	0.0393892
26050	SLITRK5	1.77261	4.14421	3.35602	0.00269504	0.0397958
84793	FOXD2-AS1	-0.733061	6.84406	-3.35452	0.00270492	0.0399124
55143	CDCA8	0.921131	4.73632	3.35302	0.00271476	0.0400283
79153	GDPD3	-0.861388	8.06727	-3.3495	0.00273804	0.0402935
8858	PROZ	-1.51175	7.32966	-3.34681	0.00275601	0.0404339
361	AQP4	1.32027	3.80406	3.34672	0.00275659	0.0404339
101669762	BLACAT1	0.778085	4.00611	3.34642	0.00275865	0.0404339
378832	COL18A1-AS1	-0.835472	5.53571	-3.34635	0.00275908	0.0404339
81671	VMP1	0.816674	10.2672	3.34606	0.00276105	0.0404339
460	ASTN1	1.83599	4.06217	3.34443	0.00277197	0.0405456
7482	WNT2B	1.54255	5.39666	3.34367	0.00277712	0.0405739
94015	TTYH2	0.804817	6.19754	3.34355	0.00277793	0.0405739
10878	CFHR3	1.17039	3.20273	3.34146	0.00279204	0.040678
3240	HP	1.61026	5.9589	3.34115	0.00279412	0.040678
339977	LRRC66	-0.931585	4.87565	-3.341	0.00279515	0.040678
5021	OXTR	1.62339	7.34467	3.33956	0.00280493	0.0407909
2898	GRIK2	-0.620759	9.91214	-3.33512	0.00283527	0.0411053
1950	EGF	-1.5129	7.98403	-3.33448	0.0028397	0.0411053
27346	TMEM97	0.659868	9.7705	3.33432	0.00284083	0.0411053
11069	RAPGEF4	-0.622977	9.67409	-3.33372	0.00284493	0.0411222
10984	KCNQ1OT1	-0.81007	7.7009	-3.33326	0.00284812	0.0411222
100130958	SYCE1L	0.760412	7.55416	3.33223	0.00285525	0.0411231
467	ATF3	0.657355	8.2564	3.33208	0.00285625	0.0411231
6261	RYR1	0.713187	4.23022	3.33207	0.00285634	0.0411231
103344931	LOC103344931	-0.89735	9.94479	-3.32658	0.00289461	0.0415554
112399	EGLN3	0.664774	6.29883	3.32528	0.00290376	0.0416571
221935	SDK1	1.02188	6.99917	3.32325	0.00291804	0.0418024
51473	DCDC2	0.612552	10.8644	3.31921	0.00294679	0.0421445
3604	TNFRSF9	0.819511	4.64283	3.31888	0.00294916	0.0421445
3053	SERPIND1	-1.29608	5.06739	-3.31863	0.00295092	0.0421445
11191	PTENP1	0.899888	6.4378	3.31826	0.00295357	0.0421445
119587	CPXM2	0.918216	7.83564	3.31813	0.00295446	0.0421445
57863	CADM3	1.35293	6.23349	3.31716	0.00296145	0.0421845
5588	PRKCQ	1.14782	6.61868	3.31677	0.00296421	0.0421939
2252	FGF7	1.13947	5.02927	3.31588	0.00297067	0.042253
57452	GALNT16	1.35054	7.07726	3.31427	0.00298223	0.0423607
143458	LDLRAD3	0.996766	8.29754	3.31262	0.00299416	0.0425002
9963	SLC23A1	-1.38764	8.93893	-3.31046	0.00300986	0.0426697
57491	AHRR	-0.655956	4.96311	-3.30925	0.00301871	0.0426984
100133190	ADIRF-AS1	-0.668622	6.49582	-3.30561	0.00304545	0.0430096
143903	LAYN	0.639544	8.41871	3.30516	0.00304871	0.0430096
53827	FXYD5	0.589751	9.23469	3.30482	0.00305121	0.0430096
113691	TUBA3FP	-0.768299	5.00633	-3.3048	0.00305139	0.0430096
6374	CXCL5	0.791307	3.47723	3.30342	0.00306157	0.0430939
9378	NRXN1	-1.40226	5.88854	-3.30341	0.00306164	0.0430939
6387	CXCL12	0.827206	10.2475	3.30249	0.00306853	0.0431607
55329	MNS1	0.604977	6.29988	3.30171	0.00307427	0.0432054
3080	CFHR2	0.597233	4.95657	3.30148	0.003076	0.0432054
55872	PBK	1.26701	5.21339	3.29844	0.00309875	0.0434342
4747	NEFL	1.8688	7.61317	3.29667	0.00311198	0.0435894
642976	GRIK1-AS1	-0.734371	4.35107	-3.28921	0.00316865	0.0441304
1949	EFNB3	1.00075	7.06322	3.28798	0.00317808	0.0441737
27330	RPS6KA6	-0.777461	7.35729	-3.28773	0.00318	0.0441737
23359	FAM189A1	1.02872	7.24942	3.2866	0.00318867	0.0442559
3990	LIPC	0.839988	7.31425	3.28599	0.00319343	0.0442688
441549	CDNF	-0.811511	3.48013	-3.2843	0.00320646	0.0443883
57159	TRIM54	-0.834252	7.29448	-3.2838	0.00321031	0.0443889
2304	FOXE1	1.56652	5.3374	3.27817	0.00325431	0.0448681
6555	SLC10A2	-1.6372	7.54208	-3.27602	0.00327127	0.0449154
50619	DEF6	0.739742	6.92452	3.2724	0.00330001	0.0452791
5874	RAB27B	1.20274	5.01271	3.27191	0.00330385	0.045301
4060	LUM	0.703962	11.0534	3.271	0.00331113	0.0453699
3741	KCNA5	0.850153	7.24455	3.2688	0.0033288	0.0455538
100506870	LOC100506870	0.670814	5.88589	3.26876	0.00332907	0.0455538
100506585	LOC100506585	0.855091	4.04433	3.26798	0.00333533	0.0455877
5764	PTN	0.922954	9.56113	3.26693	0.00334384	0.0456556
56952	PRTFDC1	0.801625	7.82724	3.26671	0.00334557	0.0456556
2328	FMO3	1.53766	7.56747	3.26526	0.00335737	0.0457761
2206	MS4A2	1.22213	3.64266	3.26048	0.00339628	0.0461913
100507421	TMEM178B	1.16856	7.98879	3.25972	0.00340254	0.0462451
221150	SKA3	0.92538	3.68202	3.25373	0.00345197	0.0466653
54829	ASPN	0.913858	8.50615	3.25338	0.0034549	0.0466735
55073	LRRC37A4P	0.618845	7.9399	3.2529	0.00345893	0.0466967
146909	KIF18B	1.3195	5.39894	3.25177	0.00346838	0.0467617
3788	KCNS2	0.585009	3.27438	3.24718	0.00350697	0.0470995
49861	CLDN20	-1.47693	7.04392	-3.23971	0.00357064	0.0478133
51176	LEF1	1.08878	7.94126	3.23811	0.00358442	0.0479096
644150	WIPF3	-0.794254	10.8874	-3.23754	0.0035893	0.0479429
3779	KCNMB1	0.995135	6.77447	3.23634	0.00359967	0.0480007
23231	SEL1L3	0.755338	8.68187	3.23622	0.00360076	0.0480007
151354	FAM84A	1.0255	6.55173	3.234	0.00362008	0.0481944
7851	MALL	0.82922	8.38635	3.22957	0.00365882	0.0485819
9495	AKAP5	0.860882	7.89971	3.22694	0.00368212	0.0487948
55843	ARHGAP15	0.893972	8.65058	3.22646	0.00368637	0.048819
581	BAX	0.611193	9.10535	3.22073	0.00373752	0.0493989
56776	FMN2	-0.897292	10.0598	-3.21918	0.00375149	0.0494976
23109	DDN	-0.851384	10.6227	-3.21853	0.00375734	0.0495218
2596	GAP43	0.833702	4.90721	3.21444	0.00379447	0.04989
